# Supplementary material for: Pericentromeric heterochromatin is hierarchically organized and spatially contacts H3K9me2 islands in euchromatin
Source: PLoS Genet. 2020 Mar 23;16(3):e1008673. doi: 10.1371/journal.pgen.1008673 (PMC7147806; doi:10.1371/journal.pgen.1008673)
Supplement: S1 File — Spreadsheet containing all raw data used to generate graphs in the main and supplementary figures. (XLSX) [file pgen.1008673.s028.xlsx]

## Sheet: EU H3K9me2 peaks
Chr	distance to PCH	PCH interaction p-value (rep 1)	prop. EU-PCH reads (rep1)	prop. EU-uniq PCH reads (rep 1)	prop. EU-repeat PCH reads (rep 1)	prop. EU-multi PCH reads (rep 1)	PCH interaction p-value (rep 2)	prop. EU-PCH reads (rep2)	prop. EU-uniq PCH reads (rep 2)	prop. EU-repeat PCH reads (rep 2)	prop. EU-multi PCH reads (rep 2)	no. EU-2L PCH reads (rep 1)	no. EU-2R PCH reads (rep 1)	no. EU-3L PCH reads (rep 1)	no. EU-3R PCH reads (rep 1)	no. EU-X PCH reads (rep 1)	no. EU-2L PCH reads (rep 2)	no. EU-2R PCH reads (rep 2)	no. EU-3L PCH reads (rep 2)	no. EU-3R PCH reads (rep 2)	no. EU-X PCH reads (rep 2)
2L	18531532	0.802598	0.0591281	0.0122246	0.0180398	0.0288637	0.76335	0.0593134	0.0121553	0.0186081	0.02855	30	71	51	44	12	30	80	51	77	18
2L	9203810	0.51453	0.0679494	0.0171826	0.0212298	0.0295371	0.389227	0.0721913	0.0182352	0.0207332	0.033223	31	53	54	33	7	33	82	53	42	13
2L	9161925	0.366966	0.075025	0.0191675	0.0202403	0.0356172	0.32969	0.0762021	0.0194181	0.0224196	0.0343645	42	71	42	30	9	40	80	56	49	7
2L	9059515	0.084698	0.0917321	0.0186353	0.0299514	0.0431454	0.0844499	0.0910984	0.0209473	0.0283381	0.041813	31	87	70	75	12	46	128	106	70	10
2L	8999017	0.555819	0.0742398	0.0155275	0.0181513	0.0405609	0.51634	0.0732926	0.0177712	0.0202686	0.0352528	37	80	76	74	14	45	124	99	87	10
2L	8943057	0.55285	0.0743889	0.0149337	0.020415	0.0390402	0.57546	0.0709484	0.0145425	0.0204549	0.035951	31	77	46	39	5	34	68	60	50	6
2L	8925217	0.106591	0.094541	0.0204551	0.0306507	0.0434352	0.0710042	0.095381	0.0222729	0.0300049	0.0431032	37	150	115	117	14	78	175	138	142	27
2L	8920042	0.110421	0.0918789	0.0217223	0.029852	0.0403045	0.0598651	0.0955039	0.0211404	0.0310406	0.0433229	44	108	96	84	29	49	143	95	106	17
2L	8832955	0.37094	0.0744589	0.0165746	0.0238735	0.0340108	0.32146	0.0762153	0.0182345	0.0243267	0.033654	37	90	63	58	9	48	100	74	88	12
2L	8554812	0.452137	0.0712111	0.0158478	0.0206228	0.0347405	0.377063	0.0729223	0.0176763	0.0233687	0.0318773	17	68	46	39	4	31	63	40	62	9
2L	8482767	0.299068	0.0823321	0.0166321	0.024741	0.0409589	0.366217	0.0775118	0.0197011	0.0244066	0.033404	28	73	56	50	7	35	63	81	86	17
2L	8243248	0.23135	0.0908268	0.0201241	0.0265973	0.0441053	0.267559	0.0875956	0.0175134	0.0257868	0.0442953	59	169	113	88	21	83	142	113	93	22
2L	8200093	0.119458	0.0910364	0.0209692	0.0279059	0.0421612	0.0949972	0.0920966	0.0219993	0.0289681	0.0411292	70	142	141	107	23	71	210	185	132	22
2L	7737922	0.550625	0.0666225	0.0152385	0.0157538	0.0356302	0.523272	0.0662966	0.0162779	0.0192092	0.0308095	34	38	55	18	4	27	48	67	49	12
2L	7623572	0.502564	0.0687824	0.0148185	0.0209928	0.0329711	0.458732	0.0678324	0.0153204	0.0204448	0.0320672	27	45	30	53	5	39	77	45	52	11
2L	7378695	0.637108	0.0677006	0.0112424	0.0164943	0.0399639	0.519674	0.0708324	0.0130634	0.0148051	0.0429639	21	39	23	16	7	24	36	29	26	3
2L	7287760	0.901158	0.0513243	0.0112787	0.0133063	0.0267393	0.931703	0.0446876	0.00934793	0.0103739	0.0249658	9	19	19	20	7	8	26	18	9	3
2L	6887206	0.208547	0.082056	0.0192749	0.0221202	0.0406609	0.451781	0.0682226	0.013465	0.019259	0.0354986	26	46	47	40	10	15	35	33	33	8
2L	6288520	0.183789	0.0896482	0.0207268	0.0267318	0.0421897	0.254011	0.0844018	0.0182075	0.025484	0.0407103	70	121	102	92	17	95	127	100	98	17
2L	6108243	0.351646	0.0757649	0.0149768	0.0195419	0.0412462	0.326693	0.0764359	0.0173255	0.0208197	0.0382907	37	55	15	31	6	33	57	53	33	11
2L	6080448	0.34323	0.0828832	0.0218548	0.0264319	0.0345965	0.313131	0.0817693	0.019494	0.0263878	0.0358875	71	129	108	79	19	85	135	102	90	24
2L	5584531	0.0587886	0.0988375	0.0216693	0.0293298	0.0478384	0.083779	0.094101	0.0234522	0.0277878	0.042861	117	195	169	113	23	140	236	206	144	59
2L	4778009	0.451567	0.0758621	0.0181122	0.0189481	0.0388018	0.665823	0.0639574	0.0130363	0.0198299	0.0310913	22	50	66	43	19	24	63	38	39	5
2L	3426862	0.981687	0.0201689	0.00281426	0.00140713	0.0159475	0.990656	0.0115496	0.00240616	0.00240616	0.00673725	0	0	1	0	4	1	2	0	0	0
2L	3418534	0.499294	0.0738657	0.0131689	0.0120915	0.0486053	0.531197	0.07029	0.0133938	0.0148329	0.0420633	20	29	15	21	6	18	34	15	21	5
2L	3406375	0.486881	0.0694811	0.0150493	0.0163198	0.038112	0.626763	0.0610624	0.0133025	0.0177367	0.0300231	8	44	30	25	2	28	41	23	22	4
2L	3157290	0.391618	0.0739333	0.0139318	0.0178105	0.0421911	0.431594	0.0708955	0.0140116	0.0156869	0.0411971	46	44	28	23	3	29	42	27	29	2
2L	3008771	0.561461	0.0741059	0.0166781	0.0191713	0.0382565	0.57546	0.0709654	0.0169492	0.0173176	0.0366986	35	44	26	25	5	42	65	28	33	5
2L	17905931	0.863884	0.0480043	0.00957389	0.0062028	0.0322276	0.892102	0.0436221	0.00845485	0.00833231	0.0268349	5	19	11	18	0	6	15	11	13	3
2L	2481407	0.0965812	0.0903187	0.0193826	0.0304726	0.0404636	0.10252	0.0894098	0.0238594	0.0267895	0.038761	39	42	38	21	9	27	77	57	45	9
2L	2456011	0.26642	0.0798152	0.0123536	0.0149318	0.0525298	0.262518	0.0796607	0.0128705	0.0153081	0.0514821	16	35	18	16	10	21	34	20	25	5
2L	17843352	0.00493045	0.1093	0.0245575	0.0347289	0.050014	0.0037024	0.109074	0.0261798	0.0343639	0.0485307	28	115	74	72	17	54	116	126	90	14
2L	2281871	0.743089	0.0567244	0.0111851	0.0159787	0.0295606	0.675599	0.0584504	0.0135555	0.0130581	0.0318368	15	17	19	11	1	19	25	17	20	6
2L	2227028	0.633437	0.0678777	0.0167985	0.0177752	0.033304	0.743395	0.0604126	0.0148166	0.0172724	0.0283235	16	34	34	25	5	24	37	30	24	6
2L	2209973	0.411748	0.077264	0.0201634	0.0206849	0.0364158	0.496908	0.0717693	0.0133558	0.0220885	0.0363249	29	78	31	46	9	27	53	30	18	7
2L	2067642	0.221368	0.0811876	0.0197057	0.0245665	0.0369154	0.214596	0.0821229	0.0203352	0.0246927	0.037095	19	27	33	24	8	27	44	27	36	7
2L	2056667	0.00461023	0.114453	0.0287093	0.0347719	0.050972	0.0192308	0.105679	0.0251233	0.0323216	0.0482344	200	426	304	326	75	220	379	323	299	66
2L	1123796	0.12555	0.0883388	0.0215635	0.0267101	0.0400651	0.0809238	0.091411	0.0234504	0.0268655	0.0410951	61	72	68	44	14	56	109	81	65	7
2L	17712661	0.831404	0.0570984	0.0108331	0.0134666	0.0327987	0.826869	0.0551713	0.00964057	0.0147228	0.0308079	20	39	30	42	6	20	43	27	32	9
2L	954105	0.0714915	0.093113	0.0227868	0.0273005	0.0430256	0.0791608	0.0916755	0.0216074	0.0266034	0.0434647	39	60	58	82	10	41	95	47	65	4
2L	844061	0.517169	0.0681758	0.011803	0.0155025	0.0408703	0.564528	0.0641278	0.013455	0.0126682	0.0380046	25	39	11	15	1	37	48	31	22	4
2L	724518	0.0869952	0.0959817	0.0256075	0.0287785	0.0415956	0.0531788	0.097284	0.0254879	0.0303945	0.0414016	126	231	149	156	28	152	293	198	175	44
2L	17588000	0.409402	0.0729284	0.0171233	0.0240849	0.0317202	0.256299	0.0794893	0.0201059	0.0237534	0.0356301	26	75	68	62	6	47	109	87	73	17
2L	16785485	0.0868111	0.091557	0.0199196	0.028326	0.0433114	0.0922073	0.0904261	0.0210025	0.0298246	0.039599	15	95	81	52	17	31	105	85	64	9
2L	16614698	0.774359	0.0535643	0.0124772	0.017325	0.0237622	0.7298	0.0535534	0.0115864	0.0177838	0.0241832	10	48	30	32	5	19	46	16	36	6
2L	16602392	0.185772	0.0846787	0.0167097	0.0253471	0.0426219	0.373413	0.0739511	0.0182229	0.0227433	0.0329849	19	46	38	48	6	19	60	74	42	6
2L	16488697	0.382051	0.0740609	0.018284	0.0211298	0.0346471	0.393571	0.071696	0.0164108	0.0227131	0.0325721	14	57	47	57	11	22	55	57	43	12
2L	16258553	0.517368	0.0728226	0.0144344	0.0195576	0.0388306	0.532603	0.0702512	0.014907	0.0178884	0.0374559	20	77	87	82	9	21	116	82	92	20
2L	15934214	0.305983	0.0774528	0.0137728	0.0196534	0.0440266	0.314509	0.0764524	0.0135653	0.0229283	0.0399587	21	33	31	32	7	15	47	37	30	7
2L	15582577	0.748533	0.0730054	0.0138536	0.0178402	0.0413116	0.812709	0.0652756	0.0116846	0.0163848	0.0372062	39	53	60	25	19	30	88	33	38	9
2L	15445189	0.230404	0.0872082	0.0209751	0.0271398	0.0390933	0.278669	0.0833571	0.0182284	0.0265515	0.0385772	37	122	112	104	42	51	141	116	93	14
2L	15264028	0.788599	0.0634664	0.0116561	0.0121319	0.0396784	0.723708	0.0645428	0.011859	0.0154539	0.0372299	24	53	49	45	9	22	53	58	58	18
2L	15254771	0.898926	0.0444887	0.0101275	0.00967538	0.0246858	0.893336	0.0434545	0.00937866	0.0107855	0.0232903	8	36	25	13	4	14	28	21	28	4
2L	14876994	0.358076	0.0823025	0.0174141	0.0251192	0.0397692	0.449198	0.0761927	0.0168662	0.0234711	0.0358554	65	105	89	77	18	64	116	117	112	24
2L	14630808	0.505507	0.0735245	0.0140365	0.02179	0.037698	0.526981	0.070505	0.0163554	0.0187314	0.0354183	33	52	36	27	5	17	80	48	55	12
2L	14627365	0.815108	0.0519992	0.0113256	0.0128028	0.0278708	0.868653	0.0464998	0.00921542	0.0128509	0.0244335	12	15	11	25	18	15	28	15	12	4
2L	14551381	0.403185	0.0847936	0.0192478	0.0248303	0.0407156	0.47408	0.0800859	0.0177103	0.0238388	0.0385368	82	189	179	174	27	89	264	191	186	32
2L	14499845	0.402994	0.0777304	0.0149776	0.0231406	0.0396123	0.398539	0.0761025	0.015799	0.0224544	0.0378491	54	89	82	58	17	74	91	97	81	30
2L	14490595	0.52906	0.0672843	0.015016	0.0215335	0.0307348	0.370113	0.0732616	0.017357	0.0235864	0.0323182	22	61	45	36	14	30	84	58	48	12
2L	14395187	0.922883	0.0620887	0.0155823	0.0179667	0.0285397	0.835702	0.0641452	0.0157097	0.0183871	0.0300484	87	196	140	140	26	114	205	162	158	33
2L	14392042	0.990315	0	0	0	0	0.993653	0	0	0	0	0	0	0	0	0	0	0	0	0	0
2L	14383307	0.817267	0.0698878	0.017245	0.0213596	0.0312831	0.718227	0.0702617	0.0166692	0.0214575	0.032135	51	134	143	108	18	60	170	103	80	20
2L	14208219	0.364627	0.0861351	0.0211849	0.026668	0.0382823	0.477425	0.0800184	0.0176751	0.0244443	0.037899	80	232	169	124	35	110	191	188	135	27
2L	14196783	0.173397	0.0877397	0.0184541	0.0240345	0.0452511	0.301574	0.0805014	0.0152087	0.0224984	0.0427942	43	70	64	63	5	19	79	46	51	17
2L	13888631	0.978029	0.0414592	0.00816127	0.0108545	0.0224435	0.979501	0.0396295	0.00861512	0.0101946	0.0208199	9	24	8	19	2	12	33	26	26	4
2L	13822317	0.0538462	0.0952221	0.0225467	0.028589	0.0440864	0.068636	0.0938575	0.0244555	0.0280378	0.0413642	38	87	99	68	18	38	104	114	108	32
2L	13740642	0.990598	0.00657895	0	0.00219298	0.00438597	0.989574	0.010296	0	0.002574	0.00772201	0	0	0	0	0	0	0	0	0	0
2L	18960433	0.696131	0.0649446	0.015709	0.0178528	0.0313829	0.697021	0.0626959	0.0140451	0.0189624	0.0296884	70	72	72	79	20	47	98	97	70	22
2L	13414097	0.986588	0.049966	0.00943549	0.0131967	0.0273337	0.98913	0.044186	0.00865333	0.0109248	0.0246079	40	80	57	54	7	30	63	57	45	15
2L	18942086	0.944709	0.0378027	0.00813475	0.0135898	0.0160781	0.895628	0.0432384	0.0112989	0.0129004	0.0190391	11	19	18	6	1	8	26	27	27	0
2L	13250141	0.665549	0.0763515	0.00883454	0.0133396	0.0541774	0.797241	0.066093	0.00935735	0.0109707	0.045765	12	32	38	25	2	22	44	29	28	5
2L	13162325	0.883606	0.0461156	0.00851512	0.00908917	0.0285113	0.867595	0.0466142	0.00778345	0.00985903	0.0289717	7	21	16	14	5	8	24	9	12	4
2L	13146275	0.166387	0.0940669	0.0225191	0.0276869	0.0438608	0.246237	0.0883618	0.0191686	0.0271429	0.0420503	127	340	289	261	49	120	321	267	270	39
2L	13031332	0.301462	0.0782091	0.0180995	0.0237676	0.036342	0.225317	0.0816293	0.0187715	0.0256012	0.0372567	31	90	76	56	19	37	114	93	70	20
2L	12963562	0.744062	0.066045	0.00897766	0.0137797	0.0432876	0.802139	0.0604558	0.0107351	0.0128068	0.0369138	7	30	19	29	6	24	29	36	34	7
2L	12903408	0.267221	0.0857698	0.0207975	0.0266896	0.0382827	0.226976	0.0857907	0.0184962	0.0267342	0.0405604	74	137	127	115	16	61	166	131	135	20
2L	12864391	0.337607	0.0761578	0.0165524	0.0225715	0.0370339	0.406603	0.0710073	0.0138385	0.0233666	0.0338022	24	65	23	32	12	22	41	29	31	8
2L	12618664	0.00598291	0.106498	0.0239553	0.0327896	0.0497534	0.0112945	0.106364	0.0251629	0.0308753	0.0503257	36	71	100	123	17	42	80	111	128	14
2L	12533429	0.00512821	0.107341	0.0257831	0.0357447	0.0458129	0.00608167	0.108395	0.0242179	0.0330858	0.0510916	22	86	130	93	17	38	120	114	111	20
2L	12381717	0.00880437	0.106748	0.0234971	0.0328337	0.0504176	0.0312059	0.098538	0.0237632	0.0324085	0.0423664	30	96	69	85	16	52	123	108	89	6
2L	12157824	0.0507132	0.0959937	0.0241381	0.0301168	0.0417388	0.0342031	0.0978513	0.0237158	0.0315894	0.0425461	59	97	71	75	16	52	100	102	91	22
2L	11917982	0.437972	0.0836327	0.0177719	0.0248217	0.041039	0.463629	0.0804402	0.0173815	0.0229059	0.0401527	78	168	118	116	35	73	203	153	117	36
2L	11319227	0.0282067	0.103495	0.0220358	0.0329902	0.0484687	0.0490196	0.0977051	0.0212383	0.0307054	0.0457615	58	184	190	179	35	103	223	167	164	41
2L	10917648	0.666138	0.0607772	0.0132174	0.0175102	0.0300497	0.610014	0.0618315	0.0167011	0.0163258	0.0288047	8	32	21	20	4	16	54	30	29	8
2L	10891286	0.258314	0.0861443	0.0200372	0.0234767	0.0426304	0.267677	0.0838631	0.0189639	0.0261058	0.0387935	68	163	134	75	20	82	161	144	109	31
2L	18668718	0.482914	0.0744555	0.0194391	0.0235583	0.0314581	0.486509	0.0722067	0.0149908	0.0223658	0.0348501	54	137	159	127	38	45	128	121	106	31
2L	10554985	0.460604	0.0753876	0.0163157	0.0231428	0.0359292	0.512366	0.0711912	0.0147073	0.0215479	0.034936	25	83	76	37	7	21	78	63	48	16
2L	10549879	0.760169	0.0557313	0.0103093	0.0134735	0.0319486	0.737659	0.0550323	0.00889587	0.0140415	0.0320949	5	27	23	19	3	10	25	25	19	6
2L	10274684	0.482482	0.0771551	0.0166499	0.0201056	0.0403996	0.510398	0.0735581	0.0157147	0.0216773	0.0361661	36	71	42	40	11	25	77	54	39	7
2L	10030313	0.0389774	0.103826	0.0234251	0.0311831	0.0492179	0.069398	0.0978459	0.020998	0.0307479	0.0461001	101	174	212	182	32	81	218	192	167	33
2L	18593203	0.928861	0.0407324	0.00355008	0.00878176	0.0284006	0.942172	0.0370681	0.00587051	0.00670916	0.0244884	2	7	3	3	0	0	13	7	4	1
2L	9781844	0.0373305	0.0979841	0.0233277	0.0324765	0.0421799	0.0292666	0.0988571	0.0244034	0.030958	0.0434958	59	147	117	102	49	65	139	173	145	38
2L	9760672	0.163937	0.0858646	0.0229816	0.0263789	0.0365041	0.151975	0.0858399	0.0186835	0.028864	0.0382925	31	109	62	63	11	37	80	59	71	12
2R	1179977	0.874808	0.0562646	0.0138603	0.0148552	0.0275491	0.898134	0.0526237	0.0126858	0.0134022	0.0265357	36	113	67	52	5	43	110	60	91	21
2R	1398200	0.00326323	0.103898	0.0244233	0.0336172	0.0458571	0.055758	0.0915783	0.0193918	0.026245	0.0459414	22	123	111	54	18	32	107	71	57	10
2R	1435941	0.0711619	0.0917497	0.0212085	0.0250762	0.045465	0.0403952	0.092947	0.0204373	0.0252485	0.0472612	69	215	155	152	31	70	260	187	162	30
2R	1493515	0.194161	0.0799348	0.0186682	0.0199211	0.0413456	0.347349	0.0725521	0.0163381	0.0202149	0.0359991	19	84	42	66	16	22	78	50	53	11
2R	1507377	0.470631	0.0716602	0.0112983	0.0118213	0.0485406	0.594023	0.0641812	0.0125593	0.0141416	0.0374802	11	28	17	17	11	15	39	18	19	6
2R	1518061	0.386322	0.0824833	0.0169432	0.0232914	0.0422486	0.393395	0.0799482	0.0182503	0.0229208	0.038777	32	100	89	63	16	51	119	105	60	10
2R	1691549	0.00217865	0.106166	0.0275673	0.0309343	0.0476641	0.00657414	0.101487	0.0252598	0.0309029	0.0453243	12	84	46	45	7	10	78	47	46	9
2R	1818606	0.795867	0.0572207	0.00720125	0.0096341	0.0403854	0.647595	0.0618635	0.0116152	0.0116994	0.0385489	3	12	23	14	4	9	40	21	31	5
2R	1845254	0.0332717	0.0985636	0.0234681	0.0288217	0.0462737	0.0832232	0.092947	0.0225717	0.0272185	0.0431567	138	462	396	288	56	166	532	384	356	76
2R	1895214	0.150231	0.0872604	0.017413	0.0239332	0.0459142	0.153238	0.0854585	0.0196926	0.0244891	0.0412768	40	107	99	70	14	47	160	132	93	15
2R	2068549	0.427484	0.0732256	0.013844	0.0179902	0.0413914	0.501822	0.0682455	0.0138196	0.0147936	0.0396323	26	44	46	43	4	25	60	31	34	11
2R	2106483	0.789015	0.0684552	0.0127017	0.0125341	0.0432195	0.743725	0.0666961	0.0118023	0.0138981	0.0409957	35	115	51	39	15	29	99	41	56	16
2R	2484300	0.454677	0.0723746	0.0162779	0.0221311	0.0339657	0.383382	0.0735754	0.0183757	0.0215778	0.033622	36	93	80	68	6	37	128	98	86	21
2R	2558771	0.198332	0.0824436	0.0202161	0.0215427	0.0406848	0.208455	0.0813506	0.0207277	0.0216192	0.0390037	55	92	49	37	15	31	89	79	58	19
2R	2585561	0.0160334	0.0988685	0.0241974	0.0318656	0.0428055	0.0665203	0.0906702	0.0215625	0.0273265	0.0417811	51	208	140	99	25	65	179	136	104	40
2R	2625129	0.0246914	0.0946789	0.0193447	0.0315072	0.043827	0.036523	0.0913066	0.0217685	0.028792	0.0407461	34	96	61	78	12	36	116	88	99	16
2R	2917086	0.205519	0.0781404	0.0173393	0.0231695	0.0376316	0.292184	0.0727987	0.0167843	0.0223791	0.0336353	17	75	52	39	5	13	67	36	51	13
2R	3275792	0.460575	0.075505	0.0178343	0.0235038	0.0341669	0.348408	0.0774311	0.0182572	0.0228862	0.0362877	31	126	81	89	23	55	134	106	84	29
2R	3393648	0.303756	0.0809452	0.0161398	0.0242976	0.0405078	0.392755	0.0759197	0.0164403	0.022271	0.0372085	48	125	72	80	20	61	141	92	101	22
2R	3518779	0.0145985	0.0977353	0.025246	0.031047	0.0414424	0.0500914	0.0902076	0.0194716	0.0263392	0.0443969	46	138	108	80	35	40	123	104	91	17
2R	4747512	0.32506	0.0802514	0.0146998	0.0153231	0.0502285	0.437102	0.0741648	0.0136173	0.017481	0.0430665	37	73	50	45	8	33	68	46	41	13
2R	4783402	0.853942	0.0577305	0.0119785	0.0112189	0.0345331	0.796048	0.0589403	0.0105027	0.0142126	0.0342251	21	43	49	41	6	20	56	33	34	14
2R	4883850	0.155547	0.0847658	0.0159547	0.0202779	0.0485332	0.204082	0.0816281	0.0157716	0.0230542	0.0428023	22	62	96	52	8	37	84	52	55	17
2R	4902827	0.63907	0.0576048	0.0119291	0.012086	0.0335897	0.568298	0.059643	0.0108838	0.0165433	0.0322159	7	23	13	10	2	3	21	13	16	4
2R	4952202	0.129993	0.0828777	0.0202204	0.023605	0.0390523	0.213294	0.0765561	0.0190044	0.023467	0.0340848	23	49	37	34	8	24	54	52	31	7
2R	5047718	0.419753	0.0672394	0.0186658	0.0162265	0.032347	0.639153	0.055873	0.0152381	0.0146032	0.0260317	12	56	23	34	13	10	56	14	30	4
2R	5328404	0.986822	0.0273147	0.00461156	0.00792243	0.0147807	0.984413	0.0285532	0.00692521	0.00820371	0.0134242	3	6	17	3	0	7	18	13	8	3
2R	5334990	0.943431	0.0390348	0.00993613	0.00745209	0.0216466	0.951371	0.0342673	0.00705503	0.00645031	0.0207619	2	22	17	8	5	2	27	15	10	2
2R	5578555	0.727753	0.070751	0.0116944	0.0150403	0.0440164	0.743461	0.0667426	0.0134069	0.0153639	0.0379717	34	90	73	63	12	36	137	65	69	12
2R	5711562	0.0108932	0.100554	0.0281571	0.0279989	0.0443976	0.00949598	0.0992122	0.0249176	0.0277116	0.046583	27	128	106	109	12	43	133	102	89	35
2R	5769951	0.544494	0.0772411	0.0161142	0.021358	0.0397688	0.617173	0.0719271	0.0151425	0.0188294	0.0379551	48	99	70	86	16	39	118	98	62	12
2R	5893748	0.321247	0.0774817	0.0185796	0.0236589	0.0352433	0.168367	0.0831749	0.019377	0.0246051	0.0391927	40	100	77	70	15	39	134	103	98	24
2R	6218328	0.765514	0.0693752	0.0172617	0.0198871	0.0322263	0.819287	0.0631677	0.0132033	0.0185175	0.0314469	22	67	44	37	9	27	68	45	32	10
2R	6255886	0.336838	0.0769179	0.020086	0.0218998	0.0349322	0.338921	0.0756337	0.0189084	0.0202424	0.0364828	18	83	83	38	10	36	70	72	58	15
2R	6272230	0.309368	0.0725058	0.0152469	0.021296	0.0359629	0.233747	0.0753355	0.0147316	0.0230455	0.0375583	13	61	39	23	7	18	46	33	40	4
2R	6854047	0.796715	0.0525959	0.010709	0.0112512	0.0306358	0.848263	0.0470106	0.0077374	0.00832356	0.0309496	4	24	15	6	2	5	13	12	12	2
2R	7096506	0.0660153	0.0957167	0.0218476	0.0299789	0.0438903	0.115192	0.091051	0.0204412	0.0282323	0.0423775	147	544	437	390	60	209	656	443	395	91
2R	7724269	0.0711692	0.0872693	0.0212544	0.0275154	0.0384996	0.00584368	0.101797	0.0232589	0.0313973	0.0471404	37	118	84	46	6	52	121	98	100	22
2R	8079317	0.286077	0.0788465	0.0186866	0.024064	0.036096	0.225583	0.0806139	0.0191098	0.0251661	0.036338	37	82	27	40	12	27	77	63	48	20
2R	8493736	0.0508351	0.089265	0.0205194	0.0252724	0.0434732	0.143901	0.0805592	0.0203158	0.0243387	0.0359047	18	51	37	37	0	16	64	32	32	10
2R	8499454	0.306575	0.0846499	0.0177679	0.0254404	0.0414416	0.57041	0.0735861	0.0167714	0.0219285	0.0348862	38	88	72	42	24	34	95	65	72	18
2R	8513734	0.172263	0.0809923	0.019188	0.0255486	0.0362557	0.3883	0.0705274	0.0139784	0.0206045	0.0359444	14	57	39	24	1	14	32	22	29	3
2R	8615381	0.281387	0.0761642	0.0157853	0.0219679	0.0384109	0.334186	0.0731637	0.0144936	0.0210447	0.0376254	12	49	63	41	7	16	73	49	44	6
2R	8986599	0.0620438	0.0890183	0.0177825	0.0270971	0.0441387	0.0632541	0.0889594	0.0193468	0.0269872	0.0426254	32	64	85	61	12	48	83	103	78	6
2R	9159156	0.900066	0.0544975	0.0112694	0.0149688	0.0282592	0.925357	0.0500357	0.0103758	0.0136758	0.0259841	34	77	67	46	14	25	93	51	75	15
2R	9283820	0.040146	0.0918835	0.0182512	0.0218242	0.0518082	0.0095064	0.0993771	0.01633	0.0234369	0.0596103	33	95	59	50	10	34	91	83	59	13
2R	9721167	0.980392	0.0129964	0.000722022	0.00288809	0.00938628	0.978817	0.00949709	0.00194259	0.00215843	0.00539607	0	0	1	2	0	0	3	3	0	0
2R	10144637	0.336496	0.0734793	0.0151349	0.0189475	0.0393969	0.483364	0.0661288	0.0139269	0.0164241	0.0357777	34	65	51	40	4	27	73	54	57	8
2R	10378784	0	0.113412	0.0247251	0.037004	0.0516828	0.00218659	0.105007	0.0230533	0.0316689	0.0502852	68	186	212	181	31	71	253	195	175	34
2R	10604535	0.42992	0.0668071	0.0160999	0.0195606	0.0311466	0.4916	0.0634289	0.016388	0.0193073	0.0277335	17	61	40	40	10	26	56	58	37	9
2R	11537827	0.88579	0.0554957	0.0101228	0.0122048	0.0331682	0.879912	0.0540023	0.0113622	0.011809	0.0308311	12	35	25	24	5	11	32	32	29	3
2R	11613156	0.792445	0.0614347	0.012082	0.01548	0.0338727	0.809001	0.0582487	0.0105863	0.0139395	0.0337229	25	53	38	52	9	18	61	42	33	5
2R	11674768	0.134417	0.0880842	0.0194986	0.0236769	0.0449087	0.150165	0.0856277	0.0160049	0.0245034	0.0451194	37	174	132	124	25	47	131	112	134	12
2R	11806536	0.149791	0.0873107	0.0215178	0.025473	0.04032	0.0417124	0.0928897	0.0201893	0.0282936	0.0444068	44	168	166	141	18	85	207	174	146	22
2R	11916974	0.984156	0.0441601	0.00838776	0.012764	0.0230083	0.985205	0.0427334	0.00835724	0.0114216	0.0229546	25	66	62	40	4	19	71	73	56	6
2R	12067250	0.642336	0.0607355	0.0139976	0.0165283	0.0302096	0.746252	0.0533583	0.0101304	0.0148487	0.0283791	10	44	35	25	13	13	36	30	17	2
2R	12315410	0.233472	0.083465	0.0163703	0.0210763	0.0460184	0.234907	0.0821275	0.0167	0.0225622	0.0428653	44	116	110	70	29	51	134	117	102	18
2R	13238916	0.0149635	0.0974354	0.0217371	0.0307465	0.0449519	0.0095064	0.0993311	0.0229691	0.0325193	0.0438427	43	100	81	84	22	43	146	110	78	18
2R	14050141	0.540962	0.0721496	0.0142117	0.0238845	0.0340534	0.424808	0.0745766	0.0171515	0.022297	0.0351281	44	127	112	104	22	61	186	153	133	27
2R	14121789	0.53042	0.0726391	0.0157271	0.0178815	0.0390305	0.458617	0.0733873	0.0136018	0.0203871	0.0393984	45	127	56	76	20	23	105	96	75	8
2R	14386798	0.402592	0.0774215	0.0136094	0.0203417	0.0434704	0.505818	0.0715046	0.0140881	0.0178923	0.0395242	29	110	81	76	13	17	125	75	97	19
2R	14403306	0.513053	0.0699691	0.0118643	0.0174416	0.0406632	0.474125	0.0694716	0.014068	0.0157614	0.0396422	12	51	45	55	2	14	76	69	74	9
2R	14456952	0.687351	0.0722423	0.0145268	0.0209162	0.0367993	0.606605	0.0722791	0.0150603	0.0214961	0.0357227	44	125	81	112	18	38	142	118	99	24
2R	14479772	0.761784	0.0590324	0.0104305	0.0134635	0.0351383	0.786079	0.055227	0.00930418	0.0132917	0.0326311	18	52	20	20	5	11	46	32	18	7
2R	14812428	0.448376	0.0803174	0.016328	0.0219487	0.0420407	0.425363	0.0788472	0.0159098	0.022312	0.0406253	36	145	136	112	47	53	147	151	151	29
2R	14894307	0.68043	0.0666748	0.0134573	0.0202471	0.0329704	0.71921	0.062399	0.0131106	0.0175676	0.0317208	29	112	85	79	21	46	106	108	78	37
2R	14997300	0.479562	0.0676873	0.0147993	0.0218047	0.0310833	0.397441	0.0700878	0.0146393	0.0224312	0.0330172	17	70	80	55	12	31	82	77	60	19
2R	15136727	0.0739372	0.0951362	0.0224613	0.0300211	0.0426537	0.164333	0.0887521	0.0197939	0.0269216	0.0420366	155	569	466	384	56	201	615	472	399	89
2R	15215265	0.11381	0.0929454	0.0206228	0.0292209	0.0431017	0.128137	0.0902865	0.0202376	0.0265777	0.0434713	112	376	259	230	55	126	344	316	298	46
2R	15308601	0.191522	0.085266	0.0179858	0.0269663	0.0403138	0.253348	0.0811827	0.0184107	0.0246838	0.0380882	60	183	160	106	30	66	203	170	154	28
2R	15344853	0.864008	0.0645237	0.01115	0.0146491	0.0387247	0.91889	0.0568041	0.0100734	0.0133032	0.0334274	35	103	86	80	27	43	112	83	73	19
2R	15433066	0.292994	0.0813237	0.016124	0.0256071	0.0395925	0.272667	0.080483	0.018078	0.0230193	0.0393858	57	130	106	95	13	64	174	156	123	27
2R	15605963	0.567732	0.076432	0.0148666	0.0204854	0.04108	0.568824	0.0736626	0.0139357	0.020015	0.0397119	48	164	133	123	27	59	172	163	138	26
2R	368403	0.628377	0.068772	0.0176799	0.0209256	0.0301665	0.769265	0.0600435	0.0155703	0.0158855	0.0285876	59	119	77	75	8	45	146	74	75	25
2R	437433	0.189985	0.0853431	0.0198985	0.0264691	0.0389756	0.172338	0.084651	0.0208294	0.026005	0.0378167	51	186	95	53	18	60	174	129	98	18
2R	452485	0.526274	0.0777861	0.0176912	0.0213143	0.0387806	0.541876	0.0746787	0.0176798	0.0190984	0.0379004	80	199	124	94	26	80	291	139	98	42
2R	511099	0.439926	0.0806102	0.0194529	0.0198919	0.0412654	0.49432	0.0763506	0.0183663	0.0203815	0.0376028	47	221	134	89	20	71	255	151	138	27
2R	593908	0.383417	0.08254	0.0184998	0.0219432	0.0420971	0.379128	0.0804902	0.017663	0.0222082	0.0406191	42	166	85	77	29	56	196	102	83	18
2R	666874	0.00474453	0.103701	0.0241459	0.0341656	0.0453898	0.0146252	0.0970915	0.0242612	0.029741	0.0430893	31	116	91	86	25	44	158	89	60	21
2R	670635	0.312913	0.0844767	0.0205446	0.024555	0.0393771	0.248877	0.0853846	0.019578	0.0243589	0.0414477	55	263	172	149	56	84	262	216	157	37
2R	978084	0.215373	0.0817547	0.0211366	0.0253639	0.0352542	0.231414	0.0803213	0.0208698	0.0236158	0.0358357	32	166	107	76	22	51	182	80	99	27
2R	1106338	0.0193431	0.0958969	0.0225046	0.0266611	0.0467312	0.013894	0.0974132	0.0251293	0.0281843	0.0440995	29	99	87	54	12	39	155	103	62	12
3L	8271160	0.658322	0.0606866	0.0125412	0.0166862	0.0314592	0.609121	0.0606855	0.0134756	0.0167315	0.0304784	17	22	31	16	3	19	24	34	26	5
3L	7855530	0.442281	0.0713043	0.0143478	0.0192754	0.0376812	0.409027	0.0707472	0.0164282	0.0178855	0.0364335	3	16	34	11	6	5	21	35	19	4
3L	7726447	0.160621	0.0946303	0.020152	0.02519	0.0492884	0.2909	0.0873314	0.0181296	0.0245781	0.0446238	47	119	89	69	32	43	100	110	78	21
3L	7519284	0.39817	0.078138	0.0150241	0.0166934	0.0464205	0.431858	0.0747038	0.014455	0.0152844	0.0449645	17	51	53	43	7	25	48	65	45	5
3L	7451865	0.309662	0.0848569	0.019807	0.023743	0.0413069	0.336572	0.0821736	0.0181969	0.022836	0.0411407	41	91	81	74	17	32	89	143	80	22
3L	6978989	0.0352414	0.100257	0.0230191	0.0282032	0.0490345	0.083837	0.092379	0.0208479	0.0267985	0.0447326	35	108	117	92	13	48	106	94	89	25
3L	6925086	0.705146	0.0578361	0.0134878	0.0154669	0.0288814	0.80456	0.0490196	0.00927871	0.0148226	0.0249183	11	51	52	23	9	7	29	49	20	9
3L	6861622	0.00350467	0.111769	0.0258847	0.034672	0.0512127	0.00506921	0.107451	0.0251749	0.0346683	0.0476073	51	128	129	141	33	61	144	156	151	36
3L	6825280	0.982282	0.0286013	0.0082316	0.00774329	0.0126264	0.983623	0.0276796	0.0057715	0.00742049	0.0144876	3	15	29	21	18	2	18	26	18	4
3L	6820221	0.969821	0.0412371	0.0206186	0	0.0206186	0.640281	0.0657895	0.00657895	0.0197368	0.0394737	0	1	2	1	0	0	0	1	0	0
3L	6672195	0.956776	0.0444341	0.00795136	0.0109136	0.0255691	0.961396	0.0394845	0.00836304	0.00740335	0.0237181	2	11	4	17	5	5	15	11	10	0
3L	6666952	0.972837	0.044415	0.0100662	0.0142163	0.0201324	0.969297	0.0443218	0.00985804	0.0132098	0.0212539	13	48	62	42	5	15	64	60	45	6
3L	17239340	0.468496	0.0831681	0.0174322	0.0245825	0.0411534	0.544543	0.0781079	0.0170641	0.0239807	0.0370632	47	175	141	131	20	60	151	153	168	20
3L	6467266	0.981456	0.0181818	0	0	0.0181818	0.885993	0.0416667	0	0.0208333	0.0208333	0	0	0	0	0	0	0	0	0	0
3L	6418434	0.473092	0.0719613	0.0153126	0.0180895	0.0385592	0.675248	0.0606689	0.0141489	0.0162927	0.0302272	22	34	44	27	6	7	46	46	52	4
3L	6202769	0.820764	0.0695115	0.0127229	0.0147195	0.0420691	0.806066	0.0673081	0.0133629	0.0151721	0.0387731	10	56	74	67	5	24	65	68	81	9
3L	5654508	0.0725537	0.100143	0.0260821	0.0292211	0.0448397	0.206592	0.0905813	0.0224266	0.0276332	0.0405215	62	265	223	193	31	77	223	269	195	26
3L	5549430	0.295305	0.0853507	0.0197221	0.0226017	0.043027	0.168675	0.0894554	0.0197747	0.0276845	0.0419962	35	109	172	120	20	50	163	160	114	20
3L	5429345	0.186613	0.0853535	0.0207514	0.0265262	0.0380759	0.0863502	0.092194	0.0201759	0.0299401	0.042078	17	67	75	71	7	30	78	85	68	8
3L	5320789	0.20589	0.0842052	0.0199205	0.0275963	0.0366884	0.201931	0.0838037	0.0205088	0.0247234	0.0385715	34	83	98	80	12	56	115	126	99	22
3L	4904492	0.00834492	0.105809	0.0232089	0.0322906	0.0503099	0.0130293	0.101374	0.0213686	0.0333249	0.0466802	14	39	33	45	4	10	41	42	32	3
3L	4899584	0.288363	0.0784877	0.0182401	0.0203405	0.0399071	0.383434	0.0719117	0.0169087	0.0236722	0.0313308	20	34	57	16	5	13	35	46	27	3
3L	4863887	0.919809	0.0630604	0.0136835	0.0112961	0.0380808	0.921662	0.0594064	0.0122293	0.0122776	0.0348995	13	43	65	43	12	24	35	68	49	11
3L	4855934	0.906737	0.052166	0.00816512	0.0104332	0.0335677	0.950478	0.042144	0.00675123	0.00675123	0.0286416	1	7	14	10	1	2	11	5	4	2
3L	4636273	0.823829	0.0541352	0.0132037	0.0134438	0.0274877	0.835345	0.0515251	0.0114386	0.0124691	0.0276175	6	8	43	27	7	9	17	29	25	7
3L	4583057	0.157757	0.0948223	0.0211474	0.0273325	0.0463424	0.339861	0.085509	0.0190215	0.0244339	0.0420536	68	179	243	180	49	52	247	210	186	33
3L	4551045	0.187695	0.087471	0.0204555	0.0236071	0.0434085	0.333983	0.078745	0.0183704	0.022963	0.0374116	14	59	101	65	24	22	57	99	71	16
3L	4386398	0.344311	0.0774607	0.0175699	0.0200594	0.0398315	0.240815	0.0815152	0.0187006	0.0232558	0.0395589	20	73	85	72	8	31	75	135	85	18
3L	4340037	0.0170741	0.105841	0.0262457	0.0295893	0.0500059	0.0633502	0.0962869	0.0214675	0.0276264	0.047193	40	168	270	149	51	62	183	184	142	44
3L	4191933	0.84739	0.0520844	0.0112278	0.0143466	0.02651	0.710914	0.0590221	0.0133187	0.0188834	0.0268199	6	11	37	24	4	6	33	33	34	5
3L	4035869	0.037751	0.0981242	0.0216757	0.0291788	0.0472697	0.0589971	0.0951265	0.0223075	0.0280619	0.044757	11	58	59	54	11	20	75	74	54	4
3L	3925445	0.0818616	0.0994419	0.0226654	0.0298462	0.0469303	0.0644853	0.0984776	0.0249469	0.0268681	0.0466626	45	173	141	97	32	71	160	185	165	24
3L	3817711	0.00543267	0.110904	0.0262476	0.0358004	0.0488559	0.00194326	0.113491	0.0265089	0.0370809	0.0499014	31	114	137	108	21	44	151	147	112	22
3L	2815577	0.153427	0.0893049	0.0233364	0.0261812	0.0397873	0.0770131	0.0930549	0.0232637	0.0297353	0.0400559	42	101	134	108	19	36	139	159	150	27
3L	2359276	0.169478	0.0866776	0.0202851	0.0248904	0.0415022	0.229284	0.0820964	0.0200516	0.0239698	0.038075	44	68	84	69	17	21	83	126	82	13
3L	2338644	0.252666	0.0807405	0.0224351	0.0216637	0.0366418	0.196836	0.0818432	0.021638	0.0223107	0.0378945	30	69	81	71	9	15	77	100	83	17
3L	2260712	0.36981	0.082426	0.0181685	0.0187696	0.0454879	0.591916	0.0721215	0.015071	0.0174962	0.0395542	10	54	82	45	20	16	41	72	49	11
3L	2123218	0.37274	0.0741611	0.0189597	0.0205537	0.0346477	0.496045	0.0664431	0.0163488	0.0169776	0.0331167	20	59	57	40	10	19	44	48	46	8
3L	16802727	0.755841	0.0625661	0.0130805	0.0184143	0.0310714	0.777734	0.0585971	0.0128983	0.0169897	0.0287091	23	56	74	64	21	26	95	70	59	12
3L	2070880	0.0465343	0.0983549	0.0227413	0.0283716	0.047242	0.0906609	0.0917971	0.0222587	0.0254214	0.0441171	39	104	127	101	9	25	123	112	113	19
3L	1986176	0.0739857	0.0999705	0.024141	0.0286285	0.047201	0.192739	0.0911244	0.0204264	0.0271423	0.0435558	63	155	179	155	27	48	148	181	117	31
3L	1878112	0.525312	0.0731015	0.0172699	0.0195765	0.036255	0.566582	0.0691876	0.0186369	0.0184402	0.0321105	21	38	95	62	8	19	53	93	89	9
3L	1638608	0.00788132	0.106428	0.0232466	0.0297304	0.0534514	0.0134946	0.101233	0.0265656	0.0282658	0.0464012	40	38	59	72	16	34	60	79	77	20
3L	1575752	0.102998	0.0925678	0.0229228	0.0264718	0.0431733	0.170599	0.0864664	0.020424	0.024841	0.0412014	42	110	127	131	18	41	98	150	128	23
3L	1557483	0.0415211	0.100986	0.0254303	0.029366	0.0461898	0.100272	0.0933682	0.0216399	0.029074	0.0426542	34	93	173	109	16	52	102	149	94	22
3L	1531593	0.0140811	0.108513	0.0286981	0.0324624	0.0473519	0.0157631	0.106267	0.0260232	0.0319503	0.048293	111	326	364	316	52	113	307	415	301	49
3L	1368033	0.509346	0.0738417	0.0222476	0.0182544	0.0333397	0.425034	0.0749412	0.0193689	0.0193085	0.0362638	33	71	87	77	17	33	70	80	47	13
3L	1353546	0.916861	0.0512629	0.0115942	0.0150725	0.0245963	0.867616	0.0525302	0.0152507	0.013017	0.0242625	11	23	41	20	10	19	31	61	37	6
3L	1076577	0.0689252	0.0954161	0.0239841	0.0263967	0.0450352	0.108988	0.090462	0.0234781	0.0249851	0.0419988	28	95	128	118	11	43	121	144	108	23
3L	1052113	0.970016	0.0412169	0.0104605	0.0123359	0.0184205	0.943654	0.0436197	0.0108023	0.010897	0.0219204	12	49	78	35	11	35	52	81	65	11
3L	1039835	0.0449799	0.0969507	0.0263389	0.0309812	0.0396306	0.0667739	0.0942079	0.0225227	0.0289405	0.0427447	55	104	144	84	13	36	104	135	101	13
3L	595878	0.0315253	0.0982858	0.0222685	0.0275553	0.048462	0.00930665	0.10304	0.0240947	0.0289845	0.049961	23	37	58	51	15	21	58	80	61	17
3L	561271	0.500239	0.0821367	0.0206714	0.0228666	0.0385987	0.521853	0.0789144	0.0193437	0.0221345	0.0374362	20	48	76	35	14	12	31	67	24	7
3L	16374568	0.701205	0.0616195	0.0124658	0.0188507	0.030303	0.62376	0.0633003	0.0135257	0.018936	0.0308386	18	24	28	19	2	19	36	25	28	4
3L	16351406	0.607876	0.0783965	0.0171656	0.0231317	0.0380992	0.637927	0.0745489	0.0152611	0.0210781	0.0382097	36	154	154	123	22	62	149	132	131	20
3L	16331717	0.0801909	0.099515	0.0224647	0.0312059	0.0458444	0.118462	0.0947452	0.0211032	0.0282684	0.0453736	139	463	481	341	58	187	480	508	426	79
3L	16300410	0.167826	0.0859981	0.0188569	0.0257622	0.0413789	0.0898092	0.0898323	0.0187654	0.02773	0.0433369	15	75	88	63	7	27	67	96	93	8
3L	16204534	0.532936	0.0809356	0.0146532	0.0215147	0.0447677	0.559828	0.077579	0.0150381	0.0205088	0.0420321	87	224	217	166	23	72	286	232	232	50
3L	16084692	0.586059	0.0708046	0.0146541	0.0180358	0.0381147	0.683174	0.0637547	0.0107677	0.017277	0.0357099	13	41	43	39	26	9	40	45	33	10
3L	15972386	0.566978	0.0715781	0.0131992	0.0211071	0.0372718	0.672841	0.0642521	0.01485	0.0182807	0.0311213	15	58	51	39	9	29	64	66	54	5
3L	15880122	0.298563	0.0778344	0.0186713	0.0213707	0.0377924	0.367148	0.0728624	0.0144835	0.0243298	0.034049	19	46	63	39	17	10	56	59	36	12
3L	15817366	0.95537	0.0589166	0.00751285	0.00850138	0.0429023	0.96513	0.0531679	0.0073992	0.0101462	0.0356225	13	31	32	33	13	14	42	30	26	4
3L	15635740	0.89817	0.052953	0.0082027	0.014218	0.0305323	0.843634	0.0542744	0.0102492	0.0141315	0.0298936	3	8	37	13	4	6	16	39	22	4
3L	15605821	0.90148	0.0526503	0.00837416	0.0114922	0.032784	0.735426	0.0609989	0.0109035	0.0160884	0.0340069	5	23	25	10	1	8	24	32	32	7
3L	15567350	0.512072	0.0737509	0.0133239	0.0196575	0.0407694	0.602847	0.0675362	0.0144608	0.018007	0.0350684	16	46	79	53	16	29	87	57	85	12
3L	14970846	0.141638	0.0924816	0.0221326	0.028543	0.041806	0.11232	0.0924493	0.0200894	0.0280637	0.0442962	37	175	147	149	38	64	183	188	203	23
3L	14961783	0.979601	0.0213904	0.0035036	0.00387239	0.0140144	0.975803	0.0218188	0.00314191	0.00349101	0.0151859	1	1	4	4	2	1	2	3	5	2
3L	14943500	0.594272	0.0788726	0.0148241	0.0189668	0.0450816	0.546692	0.0779907	0.0157813	0.0205368	0.0416725	22	83	85	72	11	35	86	93	88	24
3L	14627444	0.290218	0.0783909	0.0155566	0.0226057	0.0402285	0.0586319	0.0926429	0.0208508	0.0282623	0.0435298	18	51	46	42	8	27	81	117	74	21
3L	14454461	0.917478	0.041252	0.00898876	0.012199	0.0200642	0.926477	0.0376153	0.0079489	0.00979418	0.0198722	2	3	19	14	1	4	11	4	13	4
3L	14362617	0.0704682	0.0931692	0.0203906	0.0287036	0.044075	0.242438	0.0793062	0.0178457	0.0222714	0.0391891	28	56	52	42	5	14	49	52	39	18
3L	14246054	0.53473	0.0758098	0.0178376	0.0194997	0.0384725	0.46988	0.0769257	0.0167568	0.0216554	0.0385135	21	98	97	85	20	41	98	104	95	32
3L	14219840	0.0577566	0.101519	0.0223935	0.0317151	0.0474104	0.0680678	0.0982913	0.0216144	0.0309736	0.0457033	195	541	568	460	101	207	576	580	494	132
3L	13956490	0.897724	0.0477566	0.00981475	0.0099847	0.0279572	0.905068	0.0448402	0.00987881	0.0109438	0.0240176	16	65	45	37	9	20	53	55	47	11
3L	13950936	0.842035	0.052643	0.0113999	0.0160471	0.0251961	0.810405	0.0533118	0.00981732	0.0158444	0.0276501	8	25	31	40	4	15	29	37	24	4
3L	13855590	0.878535	0.0454277	0.00973451	0.0168142	0.0188791	0.900884	0.0404755	0.0107557	0.0101896	0.0195301	7	6	6	7	0	0	3	15	7	1
3L	13848502	0.975656	0.0538406	0.0103623	0.0116667	0.0318116	0.959876	0.0544775	0.0102268	0.0114068	0.0328438	11	33	28	33	8	14	22	40	31	6
3L	13549606	0.516922	0.0673126	0.0157155	0.0182653	0.0333318	0.640763	0.0590131	0.0124804	0.0171089	0.0294239	24	117	67	47	15	20	70	67	52	8
3L	17929211	0.624632	0.0653825	0.0158085	0.0167293	0.0328448	0.673907	0.0607353	0.0125804	0.0190103	0.0291445	10	55	37	33	7	14	34	31	32	8
3L	12894550	0.19759	0.0846643	0.0197292	0.0258635	0.0390716	0.145347	0.0872799	0.0197098	0.0291997	0.0383703	30	83	69	74	10	28	97	94	86	14
3L	12807371	0.303662	0.0774849	0.0168307	0.0292156	0.0314386	0.171242	0.0834753	0.0192126	0.0278251	0.0364376	11	25	37	27	11	14	46	48	40	9
3L	12739463	0.406347	0.0778453	0.0170051	0.022639	0.0382012	0.317216	0.0793956	0.0172316	0.0244185	0.0377455	38	116	93	122	18	51	124	134	110	27
3L	12719930	0.883198	0.0591135	0.0105139	0.0155309	0.0330687	0.883405	0.0562395	0.0106379	0.0130928	0.0325088	15	45	65	46	7	12	57	72	54	15
3L	12702400	0.866123	0.0603076	0.0115958	0.0157198	0.0329921	0.833269	0.0597982	0.0122773	0.0143808	0.0331402	11	48	45	61	12	18	54	73	46	11
3L	12653939	0.0964302	0.0907793	0.0226725	0.0273587	0.040748	0.14751	0.0851258	0.0173292	0.0265258	0.0412708	43	120	122	83	7	35	98	96	81	22
3L	12494336	0.912888	0.0637468	0.0125348	0.0155099	0.0357021	0.854789	0.0645323	0.0130482	0.0175921	0.0338919	19	64	63	49	7	24	61	80	49	15
3L	11470131	0.107671	0.0922413	0.0181922	0.0286022	0.0454469	0.0549815	0.0952479	0.0222509	0.0274691	0.0455278	39	115	121	85	17	61	157	167	140	28
3L	11417641	0.758567	0.0624362	0.00991977	0.0107221	0.0417943	0.784948	0.0581816	0.0107793	0.0119845	0.0354178	5	40	38	16	4	16	36	36	29	7
3L	11129387	0.887818	0.0487152	0.00776231	0.00963597	0.0313169	0.906946	0.044251	0.00604522	0.00858421	0.0296216	3	17	9	10	0	4	9	9	8	1
3L	10776052	0.215513	0.0919792	0.0203338	0.0285714	0.0430739	0.320516	0.0861199	0.0189855	0.0268245	0.0403099	89	202	198	179	34	94	224	231	190	36
3L	10706468	0.108653	0.0945178	0.0198985	0.0273604	0.0472589	0.190439	0.0882514	0.0204099	0.0267629	0.0410786	44	113	139	108	28	41	153	187	114	33
3L	10619642	0.233467	0.0827555	0.0182394	0.0272837	0.0372324	0.15527	0.0866324	0.0191343	0.0256004	0.0418976	13	53	57	42	4	18	47	60	57	14
3L	10522198	0.357441	0.0750469	0.0183114	0.0225891	0.0341463	0.278734	0.0773161	0.0190642	0.0218678	0.036384	7	69	47	41	4	12	44	86	58	8
3L	10331044	0.142026	0.0924631	0.0212653	0.0289182	0.0422796	0.145744	0.0905511	0.0202569	0.0275669	0.0427273	62	113	138	136	27	58	165	161	155	37
3L	10328515	0.699583	0.0580471	0.0151081	0.016937	0.0260019	0.562587	0.06322	0.0153133	0.0175611	0.0303456	21	28	43	29	1	21	43	50	35	4
3L	10173977	0.829451	0.0536985	0.00951514	0.0140659	0.0301175	0.829445	0.052002	0.0102108	0.0132011	0.0285902	11	21	31	15	6	7	26	33	25	4
3L	9759822	0.79045	0.05235	0.0133344	0.0144868	0.0245288	0.697068	0.0559955	0.013666	0.0169598	0.0253697	13	32	34	26	12	9	37	39	49	8
3L	9347155	0.207876	0.0923777	0.0204255	0.0284002	0.0435521	0.241701	0.0892318	0.0209199	0.0273685	0.0409435	44	162	201	155	20	70	221	203	142	33
3L	9258674	0.899523	0.0647541	0.0119029	0.0165319	0.0363192	0.87509	0.0628673	0.0125822	0.0167182	0.033567	10	48	68	37	12	19	68	60	49	9
3L	9091595	0.0311526	0.101148	0.0251851	0.0351542	0.0408092	0.0830571	0.0924937	0.0189924	0.0302771	0.0432242	42	105	107	61	16	35	80	65	79	18
3L	8991965	0.709318	0.0575986	0.0135135	0.0146212	0.0294639	0.666822	0.0576757	0.0130732	0.0141305	0.030472	12	20	40	16	1	9	25	36	26	6
3L	17447218	0.612851	0.0658989	0.0140284	0.0183149	0.0335556	0.662912	0.0613382	0.0131284	0.0172152	0.0309946	24	95	60	56	21	31	50	80	86	18
3L	8510700	0.723159	0.0605238	0.0075994	0.010992	0.0419324	0.77742	0.0555697	0.00837351	0.00900787	0.0381883	1	15	7	20	1	2	15	14	20	0
3R	1360026	0.0637755	0.0873763	0.0255692	0.0252712	0.0365359	0.176923	0.079191	0.0222418	0.0236901	0.0332592	31	65	94	125	6	26	77	97	107	16
3R	1891499	0.266266	0.0854438	0.0214491	0.0264337	0.037561	0.378134	0.0793522	0.0195258	0.0240846	0.0357418	80	138	147	232	34	60	169	188	287	25
3R	1906339	0.315606	0.0752302	0.0204496	0.0250542	0.0297264	0.342679	0.0733119	0.019546	0.0228706	0.0308953	16	53	63	98	6	20	65	63	110	10
3R	1948232	0.790373	0.0537916	0.0144191	0.014195	0.0251774	0.637461	0.0585629	0.0148334	0.0156681	0.0280614	11	48	33	65	7	12	33	40	74	9
3R	2075312	0.0244565	0.0954865	0.0242671	0.0279021	0.0433173	0.0303738	0.0928276	0.022731	0.0279448	0.0421517	41	136	164	207	12	60	166	133	216	26
3R	2275530	0.720188	0.0527152	0.0146927	0.0153877	0.0226348	0.705711	0.0536113	0.0159547	0.01544	0.0222165	8	20	20	48	11	12	26	30	65	5
3R	2812776	0.506988	0.0673939	0.0165507	0.0183688	0.0324745	0.52648	0.0644337	0.014442	0.017386	0.0326057	18	47	59	52	19	14	46	51	70	12
3R	3736519	0.800895	0.057894	0.010237	0.0145605	0.0330965	0.687605	0.0600696	0.0137451	0.0157025	0.030622	22	47	32	54	12	23	66	51	74	19
3R	4214130	0.326531	0.0709704	0.0168586	0.0168586	0.0372533	0.310256	0.0719285	0.0167535	0.0215934	0.0335815	10	45	39	45	7	10	39	46	53	13
3R	4613075	0.0162192	0.0968661	0.0240171	0.0297436	0.0431054	0.0426248	0.093004	0.0224214	0.0283436	0.0422389	42	194	189	188	35	68	181	179	235	37
3R	5333116	0.979646	0.047168	0.00845464	0.0120781	0.0266353	0.98763	0.0424858	0.00966579	0.0103757	0.0224443	9	22	25	31	7	6	31	34	52	5
3R	5894135	0.0764752	0.0881691	0.0220423	0.0293897	0.0367371	0.250779	0.077421	0.0172898	0.0247849	0.0353462	45	81	85	90	26	22	70	89	105	10
3R	5921778	0.396063	0.0810504	0.019973	0.0237487	0.0373286	0.374457	0.0794773	0.0179643	0.0249791	0.0365339	67	179	233	212	38	59	214	216	235	24
3R	7656547	0.0797464	0.0947253	0.0240124	0.0306589	0.040054	0.158475	0.0878843	0.0205492	0.0268385	0.0404965	76	188	182	230	38	52	192	208	252	46
3R	7736443	0.556677	0.0649992	0.0101991	0.019265	0.035535	0.553738	0.062836	0.0129304	0.0143106	0.0355949	5	19	33	28	4	15	38	43	35	3
3R	7982101	0.462528	0.0726432	0.0143885	0.0181258	0.0401289	0.442513	0.0714489	0.0134702	0.0200024	0.0379762	17	50	69	80	9	20	65	76	68	24
3R	8380240	0.117117	0.0922155	0.0227638	0.0275463	0.0419055	0.209963	0.0853614	0.0193394	0.025438	0.040584	131	400	408	397	86	140	400	409	477	86
3R	8632958	0.293222	0.0740348	0.018185	0.0191855	0.0366643	0.356857	0.0699114	0.0153488	0.0193593	0.0352032	20	59	56	83	10	25	61	60	62	20
3R	8855802	0.395963	0.0720834	0.016786	0.0223952	0.0329022	0.455997	0.0679245	0.0146401	0.019427	0.0338574	23	76	87	108	10	36	76	77	103	14
3R	9168782	0.150054	0.081695	0.0188278	0.0259981	0.0368691	0.0858494	0.0860427	0.0194303	0.026165	0.0404474	27	108	87	77	13	28	115	109	123	13
3R	9215232	0.242117	0.0762383	0.0168879	0.0180749	0.0412755	0.289196	0.0733791	0.0162661	0.0215366	0.0355764	20	70	52	70	2	26	75	62	85	17
3R	9262435	0.469469	0.0785723	0.0158012	0.0197257	0.0430454	0.407556	0.0780885	0.0155963	0.0199147	0.0425775	62	150	170	149	46	56	197	186	203	25
3R	9414275	0.113447	0.0846379	0.0171145	0.0276285	0.0398949	0.0665697	0.0881018	0.0221981	0.0257498	0.0401539	31	65	66	56	7	35	71	119	72	20
3R	9477748	0.295397	0.0738064	0.0169368	0.0250402	0.0318295	0.242997	0.0758123	0.0153583	0.0225173	0.0379367	10	40	46	63	5	7	53	59	61	7
3R	9660394	0.262034	0.0775685	0.0186463	0.0247063	0.0342159	0.208333	0.0796307	0.0184247	0.0242389	0.0369672	28	70	84	104	18	30	95	85	116	15
3R	9691848	0.766693	0.054973	0.0122656	0.0165237	0.0261837	0.619159	0.0596512	0.0114087	0.0169501	0.0312924	15	48	32	31	11	12	42	39	46	11
3R	9730013	0.125045	0.0833757	0.0191546	0.0271314	0.0370897	0.163696	0.0801594	0.017156	0.0262584	0.036745	29	63	108	66	10	40	76	86	82	13
3R	10111206	0.403061	0.0670658	0.0156628	0.0189889	0.0324141	0.307692	0.0720936	0.0143829	0.0219026	0.0358081	29	53	57	49	2	21	75	44	51	3
3R	10152552	0.221939	0.0755231	0.0177552	0.0233989	0.0343691	0.158974	0.08039	0.02	0.0240111	0.0363788	8	68	42	78	15	32	71	74	80	12
3R	10299212	0.19898	0.0781886	0.016778	0.0231308	0.0382798	0.202564	0.0773823	0.0179579	0.0226223	0.0368021	30	58	61	72	12	33	76	85	72	14
3R	10809346	0.0242842	0.0946952	0.0199012	0.0311038	0.0436903	0.0414696	0.0911516	0.0210001	0.0283785	0.0417731	7	51	78	86	15	23	84	91	69	17
3R	10973387	0.614615	0.0731501	0.0106178	0.0155039	0.0470284	0.681043	0.067065	0.011911	0.0133646	0.0417895	22	40	41	55	13	27	46	55	71	8
3R	11282873	0.756089	0.0670581	0.0142532	0.0182238	0.0345811	0.800736	0.0613712	0.0150763	0.0154722	0.0308226	31	79	73	105	11	56	106	95	86	18
3R	11495419	0.215658	0.0775803	0.0169586	0.0265327	0.034089	0.282284	0.0737514	0.0164054	0.0218374	0.0355086	18	79	74	80	23	21	100	92	90	12
3R	12682619	0.632653	0.055842	0.0123971	0.0156884	0.0277564	0.630769	0.0544475	0.0117213	0.0170148	0.0257113	3	28	23	25	1	14	21	29	25	6
3R	13006978	0.894527	0.0418576	0.0030553	0.00387005	0.0349323	0.956348	0.0344634	0.00393332	0.00524443	0.0252856	7	6	3	9	0	0	8	10	12	3
3R	14181060	0.211671	0.0778405	0.0179427	0.0216164	0.0382813	0.157876	0.0805797	0.0182685	0.0235555	0.0387557	41	71	64	76	7	37	84	75	85	18
3R	14483535	0.35986	0.073654	0.0176626	0.020173	0.0358184	0.397586	0.0708545	0.0134332	0.021664	0.0357573	25	103	87	83	9	17	74	74	80	17
3R	14999864	0.853468	0.0555914	0.0122102	0.0149105	0.0284708	0.800897	0.0540191	0.0112913	0.0160167	0.0267111	17	46	47	34	5	16	46	36	65	14
3R	15627777	0.00510204	0.0991279	0.0207912	0.0148731	0.0634636	0.0153846	0.0974326	0.0204111	0.0167129	0.0603087	8	21	25	28	13	12	37	38	26	12
3R	15774946	0.00510204	0.0990398	0.0231001	0.0333608	0.0425789	0.0435897	0.0896756	0.0201819	0.0287896	0.0407042	44	103	94	77	13	36	88	96	73	11
3R	15899309	0.981648	0.0465021	0.0100149	0.0139389	0.0225482	0.987295	0.0431792	0.0101371	0.0130575	0.0199846	23	81	68	60	15	32	93	79	71	17
3R	16536657	0.532998	0.0699001	0.0141497	0.0223619	0.0333886	0.573752	0.0655495	0.0134323	0.0189731	0.0331442	14	102	100	57	7	34	92	64	78	17
3R	17378882	0.701531	0.052514	0.0115223	0.0161313	0.0248603	0.45641	0.0642288	0.0140961	0.0211147	0.029018	9	31	36	34	6	19	52	60	42	6
3R	17996022	0.760761	0.0667194	0.0125771	0.0166342	0.0375081	0.780675	0.0623517	0.0122056	0.016744	0.0334021	54	148	125	111	11	39	174	144	131	25
3R	18374023	0.818323	0.0520259	0.00659314	0.00869096	0.0367418	0.846963	0.0475793	0.00642398	0.0100277	0.0311276	6	21	28	19	2	5	30	21	27	4
3R	18849421	0.919643	0.0445515	0.00481638	0.00361228	0.0361228	0.918224	0.0424058	0.00388027	0.0036031	0.0349224	0	0	4	2	5	1	2	1	4	0
3R	18994052	0.584452	0.0675916	0.0144248	0.0191106	0.0340561	0.571509	0.0657582	0.0144453	0.0218597	0.0294531	36	120	95	91	14	35	128	139	89	18
3R	19374883	0.507841	0.0770926	0.0168065	0.023959	0.0363271	0.445002	0.0765415	0.0174236	0.0231116	0.0360063	112	341	343	307	48	129	429	416	384	85
3R	19679493	0.78979	0.065518	0.0137319	0.0174564	0.0343298	0.820796	0.06052	0.010996	0.0163966	0.0331273	18	85	98	93	14	27	67	81	97	15
3R	19705910	0.300109	0.0735342	0.0199957	0.0222174	0.0313211	0.244453	0.0756817	0.015767	0.0252272	0.0346874	27	70	95	70	20	27	81	78	65	8
3R	19755596	0.375498	0.0697931	0.0136276	0.0226759	0.0334897	0.273554	0.074081	0.0169088	0.022981	0.0341912	27	69	44	61	11	19	81	73	83	10
3R	19906251	0.631211	0.0615357	0.0100231	0.0136678	0.0378447	0.748442	0.053061	0.00928427	0.0131668	0.0306099	15	26	29	35	4	10	36	35	29	5
3R	19986663	0.655612	0.0548278	0.00965564	0.0141796	0.0309926	0.620513	0.054857	0.0112385	0.0139646	0.0296539	9	29	26	27	10	16	44	42	39	7
3R	20134930	0.602041	0.0576824	0.0130188	0.0184326	0.026231	0.487179	0.0621648	0.0134617	0.0187151	0.029988	20	27	47	48	3	14	58	47	45	12
3R	20593239	0.566327	0.0595987	0.00404313	0.00643905	0.0491165	0.64359	0.0537697	0.00526008	0.0087668	0.0397428	2	11	3	9	1	3	5	14	3	0
3R	20754156	0.923523	0.0381003	0.00711028	0.00999463	0.0209954	0.848308	0.0446307	0.0098651	0.0117668	0.0229988	7	30	18	23	0	10	38	31	35	4
3R	20760929	0.252237	0.0809344	0.015681	0.0230847	0.0421687	0.162086	0.0832833	0.0167367	0.0243443	0.0422022	23	68	85	75	9	26	79	99	82	9
3R	20894103	0.169463	0.084458	0.019141	0.0247857	0.0405314	0.053281	0.0916993	0.0190135	0.0267275	0.0459583	41	100	76	70	20	25	114	107	107	20
3R	20906410	0.634968	0.0723829	0.0146671	0.0210618	0.0366541	0.722166	0.0650014	0.0139289	0.0177361	0.0333364	40	123	91	119	23	37	129	128	108	25
3R	21172256	0.738405	0.0677137	0.0124162	0.0193233	0.0359742	0.812103	0.0608223	0.0131393	0.0165301	0.0311529	20	72	87	41	11	25	86	75	48	12
3R	22241351	0.639262	0.0655914	0.0153674	0.0198925	0.0303315	0.604599	0.0642906	0.0148947	0.0186564	0.0307394	30	89	68	70	11	24	94	65	95	12
3R	157683	0.0630631	0.0960673	0.0253607	0.0288235	0.0418831	0.107656	0.0906778	0.0238525	0.0260271	0.0407982	74	278	299	471	56	111	351	315	494	73
X	8924105	0.112635	0.100732	0.0222768	0.0349772	0.0434783	0.35	0.0887941	0.0209297	0.0291938	0.0386706	18	92	111	81	51	31	112	70	88	34
X	8885660	0.187929	0.0967691	0.022851	0.028549	0.0453691	0.311738	0.0903138	0.0194911	0.0270908	0.043732	101	284	230	184	103	93	291	211	173	78
X	8808946	0.775475	0.0539857	0.0084771	0.0261749	0.0193337	0.655351	0.0606371	0.00964348	0.0242548	0.0267387	3	9	13	5	6	5	19	12	14	3
X	8763767	0.337557	0.0844034	0.0132321	0.0189477	0.0522236	0.391773	0.0810632	0.0143917	0.0183567	0.0483149	16	35	32	29	15	27	40	32	29	26
X	8667547	0.625792	0.0646051	0.00450058	0.0360046	0.0240999	0.43901	0.0737638	0.00540394	0.0380978	0.0302621	1	8	5	0	4	0	12	6	6	1
X	8589573	0.781415	0.0613136	0.0103947	0.015818	0.0351009	0.799435	0.0585275	0.00834052	0.0174001	0.0327869	4	11	7	15	11	4	18	12	11	4
X	8562516	0.760507	0.0552231	0.0151504	0.0161351	0.0239376	0.696778	0.057777	0.0125225	0.0186597	0.0265948	28	39	41	14	14	12	40	38	36	14
X	8176413	0.5845	0.0766104	0.0186599	0.0240177	0.0339327	0.688083	0.0694466	0.0160699	0.0221671	0.0312096	16	85	71	44	29	33	71	52	55	21
X	8081682	0.523316	0.0697782	0.0150185	0.0227203	0.0320394	0.5	0.0705153	0.0168376	0.0212685	0.0324092	16	50	35	24	5	28	62	47	50	11
X	7880879	0.469797	0.0748252	0.0172494	0.0236014	0.0339744	0.430045	0.0769153	0.0163521	0.0237206	0.0368426	16	59	53	62	13	24	49	71	65	37
X	7730377	0	0.320197	0.047619	0.0311987	0.241379	0	0.270169	0.0600375	0.0562852	0.153846	0	1	8	4	4	1	3	6	8	4
X	7704302	0.670864	0.0641541	0.0153434	0.0198744	0.0289363	0.675048	0.063253	0.0135112	0.0184165	0.0313253	3	34	23	21	16	15	35	29	23	16
X	7696215	0.69113	0.0667988	0.0164166	0.0198132	0.0305689	0.834569	0.0555826	0.0118235	0.0137738	0.0299854	11	11	34	29	10	7	16	17	13	13
X	7691510	0.906371	0.0506199	0.0109642	0.0131161	0.0265396	0.930085	0.0459759	0.0102683	0.0120259	0.0236818	8	20	26	10	8	14	27	10	22	10
X	7551160	0.617036	0.0707145	0.0147016	0.0216113	0.0344016	0.499647	0.0757014	0.0151535	0.0238221	0.0367258	10	45	47	31	18	18	52	35	40	14
X	7541214	0.478335	0.0744171	0.0183115	0.0262962	0.0298094	0.409198	0.0780369	0.0178639	0.0251034	0.0350696	9	48	32	12	10	12	40	36	27	10
X	7364911	0.338965	0.0843669	0.0211258	0.0249875	0.0382536	0.224223	0.0886926	0.0212059	0.0278487	0.0396379	27	106	90	102	30	61	136	107	99	19
X	7356448	0.0115141	0.108703	0.0241935	0.0382224	0.046287	0.0575374	0.0988132	0.0236012	0.033842	0.04137	11	54	64	37	27	25	97	61	60	11
X	17761608	0.928238	0.0532352	0.0124432	0.0167713	0.0240208	0.83911	0.0606203	0.0127274	0.0187612	0.0291317	21	65	44	37	19	14	53	51	37	20
X	7156463	0.454849	0.0822632	0.0203762	0.0249254	0.0369616	0.559717	0.0759514	0.0184137	0.0244012	0.0331365	17	76	85	100	24	26	94	89	68	52
X	6985918	0.116292	0.0934066	0.0234765	0.0241425	0.0457875	0.108746	0.093387	0.0230757	0.027567	0.0427443	7	35	35	23	19	15	28	24	25	15
X	6934837	0.0489349	0.100708	0.0265408	0.030522	0.0436449	0.196203	0.0867615	0.0221169	0.0266667	0.0379779	30	79	81	71	14	30	71	76	58	18
X	6888185	0.708201	0.0658615	0.0150972	0.0201925	0.0305718	0.778425	0.0598326	0.0137238	0.0184937	0.0276151	5	31	41	52	5	15	31	33	28	21
X	6881830	0.0264824	0.103879	0.0081087	0.0661845	0.0295858	0.138665	0.0907937	0.00994709	0.0522751	0.0285714	3	5	9	2	2	1	5	9	14	3
X	6858911	0.173746	0.0904894	0.0204986	0.0285319	0.0414589	0.313131	0.0830489	0.0182838	0.0273038	0.0374614	15	48	32	51	26	20	43	38	43	24
X	6813215	0.500229	0.0844483	0.0193122	0.023051	0.0420851	0.434604	0.085355	0.0182961	0.0270815	0.0399774	72	129	116	89	53	35	160	147	107	79
X	6772639	0.502464	0.0765889	0.0171468	0.0219479	0.0374943	0.446857	0.0783447	0.0164725	0.0233025	0.0385697	5	4	17	18	13	3	15	9	16	11
X	6750889	0.17265	0.0926136	0.0202652	0.0332386	0.0391098	0.145127	0.093116	0.0234276	0.0279263	0.0417622	14	30	41	37	26	23	61	49	50	28
X	6743405	0.459534	0.0859846	0.0189248	0.0253017	0.0417581	0.45503	0.0844821	0.0184214	0.0266561	0.0394047	24	58	57	35	34	28	55	60	43	31
X	6546569	0.956822	0.0269231	0	0	0.0269231	0.613349	0.0628272	0.0104712	0.0157068	0.0366492	0	0	0	0	0	0	0	0	0	0
X	6520305	0.0215582	0.106703	0.0216311	0.0378354	0.0472369	0.0139695	0.107714	0.0225104	0.034068	0.0511356	20	84	52	31	19	22	60	67	66	31
X	6482284	0.256903	0.0905461	0.021737	0.0265181	0.042291	0.27446	0.0883422	0.018738	0.0290909	0.0405134	26	88	70	58	58	24	100	75	79	32
X	6407213	0.302654	0.0886094	0.0207058	0.025966	0.0419376	0.351906	0.084911	0.0188914	0.0261912	0.0398283	15	86	67	109	31	22	92	91	86	47
X	6374498	0.210351	0.0926089	0.0186978	0.0247837	0.0491274	0.225007	0.0907226	0.0221196	0.0272488	0.0413541	15	37	51	44	29	22	68	72	61	34
X	6361091	0.343088	0.0903145	0.0151684	0.0234484	0.0516977	0.439939	0.0851541	0.0185814	0.0201192	0.0464535	11	25	49	44	36	24	53	47	57	32
X	6307327	0.0781415	0.0994106	0.0198035	0.0281336	0.0514735	0.14601	0.0930297	0.0182045	0.0258185	0.0490067	29	58	39	37	15	23	62	53	50	9
X	6140760	0.157691	0.0935879	0.0196099	0.0289479	0.0450301	0.275247	0.0863535	0.018434	0.0251454	0.042774	23	30	53	28	11	14	40	50	36	17
X	5957118	0.800335	0.0704848	0.0155078	0.0192588	0.0357183	0.763567	0.0704776	0.0155246	0.0223102	0.0326428	19	64	44	47	25	9	59	64	47	50
X	5806433	0.458317	0.0820996	0.0148048	0.0231494	0.0441454	0.460411	0.0804196	0.0170163	0.0235431	0.0398601	5	38	46	44	21	22	56	48	52	36
X	5775119	0.162925	0.090121	0.0204449	0.0319758	0.0377004	0.0932106	0.0946112	0.0223056	0.0305593	0.0417462	12	41	71	56	12	38	76	50	51	24
X	5756609	0.557097	0.0703164	0.0154696	0.0170768	0.03777	0.545884	0.0706372	0.0118763	0.0190552	0.0397058	9	35	30	39	10	8	28	25	28	14
X	5581408	0.910243	0.0500217	0.0116934	0.00779558	0.0305327	0.89654	0.0502351	0.00662676	0.0130398	0.0305686	2	17	3	15	3	4	6	5	5	2
X	5405413	0.797135	0.0706127	0.0156856	0.0182544	0.0366727	0.74375	0.0716913	0.0172625	0.0186775	0.0357513	27	49	54	41	31	22	59	76	53	54
X	5385393	0.0685089	0.0983954	0.0234717	0.0295717	0.0453521	0.0316456	0.102558	0.0278612	0.0297826	0.0449141	19	36	28	35	18	25	51	32	40	29
X	5372493	0.233736	0.0850165	0.0205941	0.0223102	0.0421122	0.2687	0.0828033	0.0178807	0.024241	0.0406816	10	43	51	21	9	9	19	28	34	24
X	5331745	0.0674937	0.101253	0.0232725	0.0338704	0.0441103	0.0803786	0.0987918	0.0246818	0.0278478	0.0462622	20	79	58	63	24	20	75	66	63	32
X	5132382	0.765506	0.0671849	0.0142778	0.0183232	0.034584	0.782991	0.064214	0.0152105	0.0171587	0.0318447	5	34	25	40	16	14	35	43	34	30
X	5117726	0.0928371	0.0993063	0.0240964	0.0318091	0.0434009	0.128766	0.0957244	0.023802	0.0292061	0.0427164	52	140	81	69	70	48	121	108	96	53
X	5094376	0.108413	0.0969462	0.022694	0.031165	0.0430872	0.144244	0.0932142	0.0230299	0.0281375	0.0420467	19	91	86	98	42	28	94	95	91	54
X	5066505	0.641911	0.0639296	0.0114369	0.0187683	0.0337243	0.696778	0.0576923	0.0131119	0.0174825	0.0270979	2	14	1	12	8	7	3	8	6	13
X	5057832	0.00333467	0.117085	0.0252184	0.0398991	0.0519679	0.0110637	0.108477	0.0248196	0.0317976	0.0518595	22	53	40	49	35	9	55	58	54	49
X	4978152	0.0438957	0.10585	0.0184237	0.032758	0.0546683	0.0394817	0.104697	0.0228675	0.0313512	0.0504782	28	80	87	50	51	53	132	115	84	61
X	4962011	0.460051	0.082014	0.0183997	0.0285266	0.0350877	0.494401	0.0789645	0.0200338	0.0232861	0.0356446	14	20	33	13	16	13	35	26	27	22
X	4916604	0.386374	0.0886447	0.0194139	0.0217949	0.0474359	0.498476	0.0828069	0.0157077	0.0203176	0.0467816	10	35	18	12	11	6	26	13	13	11
X	4883837	0.137018	0.0917031	0.00707008	0.00873362	0.0758994	0.342348	0.0790054	0.00741929	0.00782033	0.0637658	2	6	3	4	4	5	9	3	2	2
X	4843675	0.536255	0.0747776	0.00964873	0.0155284	0.0496005	0.696857	0.0653477	0.010042	0.00944245	0.0458633	3	9	13	14	19	4	22	9	10	5
X	4811499	0.45725	0.0821291	0.0153813	0.0196738	0.047074	0.459078	0.0804679	0.0159393	0.0244232	0.0401054	22	45	38	39	20	16	57	52	41	41
X	4762960	0.00554963	0.115198	0.0242372	0.0367836	0.0541774	0.00171932	0.124223	0.0286923	0.0400531	0.0554772	19	57	72	32	21	23	81	58	51	22
X	4746748	0.742583	0.0600451	0.0102935	0.0158014	0.0339503	0.753922	0.0579135	0.0120791	0.0144784	0.031356	4	24	17	21	13	11	19	35	21	24
X	4648235	0.979275	0	0	0	0	0.980437	0.00209644	0	0	0.00209644	0	0	0	0	0	0	0	0	0	0
X	4063862	0.0132337	0.109422	0.025938	0.0320304	0.0514537	0.0212766	0.10563	0.0244816	0.0344536	0.0466945	32	77	101	91	34	25	123	100	65	35
X	4001455	0.0876351	0.0996408	0.0261673	0.0311955	0.0422781	0.033591	0.104032	0.0256817	0.0331391	0.0452109	46	116	106	61	31	52	97	134	111	37
X	3924488	0.130011	0.0998224	0.0234826	0.031376	0.0449638	0.0464939	0.104067	0.0236159	0.0335375	0.0469133	69	175	150	150	78	61	192	181	133	135
X	3913666	0.00884012	0.111943	0.0251377	0.0350379	0.0517677	0.021189	0.107142	0.0265989	0.0320872	0.0484558	62	189	146	182	102	76	227	203	214	120
X	3784829	0.11578	0.0976835	0.0199915	0.030082	0.04761	0.150227	0.0944526	0.0226051	0.0296921	0.0421554	38	80	77	66	36	41	131	97	94	48
X	3737024	0.605042	0.0757101	0.0173913	0.0215652	0.0367536	0.880432	0.0570644	0.013315	0.0160626	0.0276868	12	13	24	41	31	14	15	27	20	22
X	3728873	0.552188	0.0705554	0.0139714	0.0265456	0.0300384	0.627337	0.0661509	0.0167351	0.0179981	0.0314177	14	12	20	7	6	4	20	22	13	26
X	3695896	0.592956	0.0682629	0.0148498	0.018073	0.0353402	0.591017	0.0683191	0.014372	0.0186419	0.0353051	4	23	39	16	19	2	32	24	24	28
X	3573011	0.634427	0.0643345	0.012628	0.0203072	0.0313993	0.535673	0.0683078	0.0140202	0.019074	0.0352136	13	13	20	15	6	7	11	8	14	6
X	3534919	0.0502868	0.103172	0.0231437	0.0313489	0.0486791	0.223674	0.0907879	0.0200559	0.0270121	0.0437199	49	115	155	97	49	55	136	114	101	62
X	3449238	0.547686	0.0782313	0.0172069	0.0262605	0.0347639	0.539723	0.0768789	0.0173541	0.0221673	0.0373576	14	65	52	71	30	30	80	57	71	54
X	3436324	0.514408	0.072522	0.0136763	0.0178168	0.0410289	0.498388	0.0733891	0.0163741	0.0200259	0.036989	3	14	26	12	15	10	32	20	20	16
X	3146684	0.0422836	0.104175	0.0253306	0.036604	0.0422408	0.034924	0.10378	0.0239561	0.0323917	0.0474318	70	109	145	175	53	81	149	150	144	47
X	3088994	0.516473	0.0796721	0.0195867	0.0239065	0.0361789	0.51093	0.0782656	0.0190437	0.0256795	0.0335424	33	81	65	65	37	36	94	54	62	48
X	2977319	0.00133387	0.127648	0.0224792	0.0563226	0.0488461	0.000399893	0.130537	0.0225108	0.0662082	0.0418179	46	86	84	44	44	28	95	80	101	51
X	2949610	0.183661	0.0969455	0.0216162	0.0291319	0.0461973	0.233689	0.0932405	0.0226843	0.0289736	0.0415827	33	145	113	128	53	63	137	144	147	56
X	2567958	0	0.273277	0.0575574	0.00266022	0.213059	0.000575374	0.234997	0.0541223	0.00196298	0.178912	1	9	211	10	0	1	20	151	14	0
X	2565817	0.0201497	0.106223	0.0261549	0.0154324	0.0646357	0.0224396	0.105196	0.0232353	0.0218627	0.060098	12	38	133	36	7	6	25	146	22	9
X	17289392	0.594861	0.0719066	0.0177637	0.022448	0.0316949	0.571151	0.0721798	0.0176325	0.0222211	0.0323263	17	63	55	62	16	27	72	69	48	21
X	2516053	0.106709	0.0982687	0.0230246	0.0300765	0.0451677	0.086377	0.0983903	0.0217691	0.0321018	0.0445194	38	112	123	113	77	50	144	136	111	65
X	2460101	0.0129553	0.110578	0.0252196	0.0359776	0.049381	0.00884146	0.111026	0.0262209	0.0353585	0.0494469	51	174	130	122	69	72	161	161	129	105
X	2437375	0.00213382	0.120773	0.0282855	0.038084	0.0544032	0.00228659	0.117767	0.0286776	0.0378023	0.051287	132	316	299	264	217	108	325	372	313	261
X	2422353	0.0019814	0.121951	0.0308919	0.0387158	0.0523435	0.00411585	0.114081	0.0275691	0.0342115	0.0523006	73	194	132	119	89	34	179	152	149	141
X	2414049	0.121515	0.0974021	0.0212221	0.0264179	0.0497622	0.130898	0.0955353	0.0215349	0.0235923	0.0504081	14	61	67	47	47	19	70	51	40	53
X	2403711	0.0784941	0.103015	0.0247178	0.0281469	0.05015	0.0650915	0.102295	0.0248981	0.0305245	0.0468722	27	89	100	82	90	28	138	101	89	71
X	17270311	0.581161	0.0810853	0.0183121	0.0258339	0.0369393	0.71875	0.0729649	0.0164375	0.0229036	0.0336237	49	78	88	84	40	35	103	70	88	44
X	1876629	0.584653	0.0724474	0.014546	0.0160994	0.041802	0.58404	0.0715279	0.017566	0.0189561	0.0350057	8	26	15	8	29	16	25	13	19	32
X	1841386	0.00944978	0.111726	0.0264372	0.0370288	0.0482598	0.0190549	0.10771	0.0267387	0.0328039	0.0481675	64	192	222	153	104	91	219	222	203	100
X	1826730	0.00575705	0.110217	0.0261934	0.0354916	0.0485316	0.0592635	0.0984519	0.0238794	0.0281291	0.0464434	10	56	52	18	13	20	38	35	48	29
X	1298012	0.436385	0.0743763	0.0181768	0.024483	0.0317166	0.320483	0.0799169	0.0197395	0.0249341	0.0352433	18	34	50	31	7	17	51	48	50	21
X	951153	0.745864	0.0635844	0.0140407	0.0204593	0.0290843	0.801201	0.0584138	0.0123514	0.0178306	0.0282318	16	30	17	27	22	12	26	25	15	29
X	891697	0.605949	0.071273	0.0128687	0.020788	0.0376163	0.67779	0.0663408	0.020426	0.0136173	0.0322975	4	18	8	10	9	1	13	20	18	27
X	877067	0.467663	0.074958	0.0136134	0.014958	0.0463866	0.650548	0.0646566	0.0106417	0.0148339	0.0391809	8	12	14	8	17	1	7	13	7	14
X	851864	0.0019814	0.12226	0.0291481	0.0384853	0.0546264	0.00838415	0.111586	0.0279347	0.0341564	0.0494948	115	360	351	353	227	163	413	339	328	241
X	803827	0.846365	0.0675257	0.0130789	0.0189886	0.0354582	0.649848	0.0764873	0.0161387	0.0227487	0.0375998	13	30	24	9	20	8	34	32	38	30
X	728410	0.560128	0.0819367	0.0181875	0.0263191	0.0374302	0.640396	0.0769728	0.0191893	0.0221539	0.0356296	15	39	50	67	57	14	58	55	44	88
X	600576	0.670325	0.0770332	0.0186113	0.020979	0.0374429	0.56814	0.080059	0.0201131	0.0210966	0.0388493	17	50	65	66	73	17	67	72	70	71
X	437844	0.00502972	0.114987	0.0252562	0.0371737	0.0525568	0.0109756	0.109882	0.0238963	0.0343407	0.0516449	49	213	210	160	147	83	237	206	216	153
X	319313	0.751901	0.0679473	0.0158429	0.0194259	0.0326786	0.68795	0.0694517	0.0166129	0.019763	0.0330758	16	81	52	54	67	24	81	88	69	83
X	33902	0.43095	0.0767798	0.0186294	0.0222222	0.0359281	0.324307	0.0825418	0.0186002	0.0252148	0.0387268	21	64	49	37	34	25	63	48	52	36
X	16652317	0.830309	0.0544643	0.0110577	0.0186813	0.0247253	0.75908	0.0575622	0.0139757	0.0178685	0.0257179	16	55	32	24	6	24	49	40	29	17
X	16473517	0.417962	0.0753594	0.0142217	0.0238058	0.0373319	0.465478	0.0724678	0.0174447	0.0232366	0.0317865	9	34	34	37	12	14	42	54	55	15
X	16451444	0.02271	0.10844	0.0266408	0.0366846	0.0451148	0.109756	0.0993524	0.0223885	0.0310145	0.0459494	49	211	156	183	23	53	183	154	132	44
X	16427746	0.545952	0.0783168	0.0164117	0.0239611	0.0379439	0.575047	0.0753189	0.0160774	0.0228928	0.0363488	19	85	41	31	5	23	61	51	43	29
X	16137024	0.476684	0.0723509	0.0168059	0.0201291	0.0354159	0.288838	0.0817753	0.0187745	0.0249018	0.038099	15	38	39	37	5	10	58	42	45	16
X	15636927	0.488154	0.0738989	0.0141925	0.0182708	0.0414356	0.378895	0.0797186	0.0161196	0.0209555	0.0426436	3	13	20	8	3	3	26	20	29	3
X	15395899	0.184474	0.0938484	0.0182248	0.0298498	0.0457738	0.243402	0.0897429	0.0195765	0.0294163	0.0407501	12	60	68	56	27	25	89	71	73	23
X	14706776	0.260504	0.0903793	0.0207586	0.027069	0.0425517	0.154759	0.0942273	0.023443	0.0273906	0.0433938	40	108	162	115	40	56	147	189	132	79
X	14683788	0.939381	0.0408307	0.00821307	0.00997301	0.0226446	0.910165	0.0437786	0.00904012	0.0101574	0.024581	3	16	18	11	4	10	22	14	15	8
X	14626824	0.545231	0.0743286	0.0165486	0.0225791	0.0352009	0.492938	0.0760084	0.0172692	0.0248581	0.0338811	20	42	41	47	10	21	67	49	47	15
X	14489507	0.352332	0.078824	0.0138475	0.0191734	0.0458032	0.367664	0.077588	0.0132743	0.0201688	0.0441449	10	26	21	33	6	8	29	31	19	10
X	14428005	0.858952	0.0473134	0.01165	0.0111745	0.0244888	0.855006	0.0469897	0.00923012	0.0138452	0.0239144	4	18	5	6	6	3	15	4	3	1
X	14205813	0.728282	0.0610922	0.00722482	0.00839354	0.0454739	0.776273	0.056395	0.00664036	0.0085651	0.0411895	3	15	17	15	9	3	9	15	13	13
X	14144591	0.615607	0.0794964	0.0159692	0.0249835	0.0385437	0.599238	0.0787338	0.0159846	0.0245191	0.0382302	40	77	84	63	26	26	101	101	79	41
X	14085982	0.734961	0.0688818	0.0109309	0.016483	0.0414679	0.78739	0.0639887	0.0123418	0.0138354	0.0378115	12	31	20	32	8	9	33	33	26	21
X	13998013	0.978123	0.00488486	0	0.000465224	0.00441963	0.978711	0.00830484	0.00219834	0.00024426	0.00586224	0	0	0	0	0	7	1	0	1	0
X	13751867	0.523583	0.0754791	0.0134869	0.0221626	0.0398296	0.620233	0.0694826	0.0159803	0.0187962	0.0347061	11	34	37	26	25	14	49	38	54	15
X	13742401	0.787193	0.0574218	0.00934285	0.0165862	0.0314928	0.74597	0.0584309	0.013259	0.0172824	0.0278895	5	21	15	16	5	16	26	22	28	8
X	13720770	0.903295	0.0565549	0.0138149	0.0161174	0.0266225	0.895761	0.055795	0.0140411	0.014657	0.0270969	10	21	14	18	2	8	21	23	17	8
X	13679341	0.197074	0.096455	0.0205488	0.0319247	0.0439816	0.298018	0.0908466	0.0217496	0.0275563	0.0415407	43	114	127	69	28	48	129	127	103	56
X	13612847	0.374283	0.0855625	0.0216545	0.0239837	0.0399243	0.434151	0.0816064	0.0209316	0.0230815	0.0375933	49	151	119	111	32	36	163	137	139	48
X	13565361	0.733894	0.068971	0.0150973	0.0170044	0.0368693	0.647827	0.0716598	0.0147535	0.0213775	0.0355288	12	48	34	20	22	11	33	37	36	18
X	13554409	0.951074	0.0419333	0.00803267	0.0130701	0.0208305	0.926554	0.0466139	0.00980023	0.011308	0.0255057	5	7	9	11	6	6	14	13	17	12
X	13541670	0.626124	0.0790053	0.0189994	0.0246479	0.035358	0.704726	0.0736722	0.0154712	0.0229054	0.0352957	24	35	56	42	23	13	44	42	38	20
X	13527023	0.217287	0.0921916	0.0217091	0.0306346	0.039848	0.255798	0.0892028	0.0213375	0.0275116	0.0403537	32	81	78	60	13	28	100	98	53	31
X	18366155	0.731359	0.0691565	0.0173287	0.0214433	0.0303846	0.849507	0.0597595	0.0134639	0.0180719	0.0282238	16	45	44	38	17	19	50	27	23	15
X	18358071	0.685566	0.0763896	0.0174591	0.0253994	0.033531	0.713567	0.0732147	0.0158646	0.0235714	0.0337788	36	60	70	60	46	29	79	64	71	42
X	13134209	0.414419	0.0876433	0.0180365	0.0274842	0.0421226	0.62622	0.0775406	0.0166438	0.0237256	0.0371712	24	91	97	83	42	37	118	105	80	33
X	12763113	0.819606	0.0587163	0.0138003	0.014972	0.029944	0.797846	0.0586234	0.0132668	0.0176891	0.0276675	3	27	21	11	11	5	22	25	20	12
X	12606810	0.707145	0.0659026	0.0153928	0.0183914	0.0321183	0.802613	0.0582372	0.0118792	0.0193545	0.0270035	16	62	28	31	35	14	62	29	32	11
X	12564460	0.689342	0.0715064	0.0165608	0.0227768	0.0321688	0.48747	0.0792485	0.0199526	0.024168	0.0351279	21	84	60	74	20	47	105	93	98	34
X	12454119	0.828757	0.0579633	0.00927412	0.0180132	0.0306759	0.889124	0.0510753	0.0110514	0.015233	0.0247909	4	8	11	11	5	6	21	16	11	11
X	12413267	0.533191	0.0715855	0.0135482	0.0208715	0.0371659	0.743606	0.0586011	0.00842069	0.0156384	0.034542	2	13	19	15	10	3	7	6	16	4
X	12367567	0.15013	0.098633	0.0203401	0.0332894	0.0450035	0.141616	0.0976929	0.0224108	0.0305996	0.0446824	72	173	226	171	67	109	240	288	211	82
X	12346912	0.202408	0.0961932	0.0213722	0.0298115	0.0450095	0.436738	0.0853035	0.019244	0.0271037	0.0389558	27	105	134	103	43	44	122	131	119	34
X	18255747	0.855676	0.0613316	0.0149776	0.0139937	0.0323603	0.92682	0.0522318	0.0112528	0.0158477	0.0251313	16	30	18	34	15	14	23	18	23	7
X	12174353	0.0435909	0.105885	0.0230288	0.031917	0.0509393	0.233689	0.0932408	0.0213495	0.0282046	0.0436866	52	172	126	118	40	56	153	141	144	42
X	12009671	0.942098	0.0448331	0.00763973	0.00703659	0.0301568	0.808969	0.057704	0.0074914	0.0095161	0.0406965	1	4	5	3	5	3	5	2	11	2
X	11977150	0.878618	0.0593185	0.0112202	0.0109727	0.0371257	0.901893	0.0551958	0.00955464	0.0112919	0.0343493	23	19	21	34	13	2	31	25	13	11
X	11072667	0.595279	0.0659932	0.0149567	0.0158751	0.0351614	0.705984	0.0572435	0.011779	0.0154117	0.0300528	7	31	15	19	9	7	27	20	21	5
X	18111011	0.508923	0.0706663	0.0199979	0.0194798	0.0311885	0.565017	0.0666179	0.017911	0.0205611	0.0281458	9	45	43	28	18	22	38	57	25	8
X	10644264	0.610172	0.0710615	0.014935	0.0215192	0.0346074	0.711864	0.0643228	0.0158955	0.0184549	0.0299724	23	38	28	24	22	27	52	44	58	18
X	10552932	0.905491	0.0507519	0.0101034	0.00916353	0.031485	0.938736	0.0445353	0.00828821	0.0135927	0.0226544	2	8	31	19	13	4	12	19	13	9
X	18073882	0.842263	0.0535131	0.0130623	0.0163278	0.024123	0.86138	0.0495012	0.0108225	0.0114813	0.0271974	8	35	15	15	9	4	28	24	15	10
X	18049839	0.883671	0.0492285	0.011861	0.0146951	0.0226724	0.876424	0.0477201	0.0119993	0.0121839	0.023537	6	30	16	27	12	7	22	20	30	11
X	10143761	0.943005	0.0330189	0.00516622	0.00628931	0.0215633	0.955121	0.0309173	0.00389025	0.00532351	0.0217035	0	6	6	4	0	0	3	8	2	1
X	10004724	0.439109	0.0829116	0.0155517	0.020981	0.0463789	0.476806	0.0797541	0.0194543	0.0213913	0.0389085	13	41	26	33	18	10	59	40	52	16
X	9968057	0.598506	0.0679556	0.0147853	0.0224623	0.030708	0.514937	0.0724723	0.0166156	0.0199152	0.0359416	12	10	21	18	9	13	29	20	30	11
X	9926418	0.0606909	0.101983	0.0254677	0.0286793	0.0478364	0.161824	0.0938638	0.019965	0.028812	0.0450868	32	69	87	109	43	42	74	68	80	26
X	9902123	0.205763	0.0887691	0.0181509	0.0258083	0.04481	0.301526	0.0835855	0.019289	0.0260968	0.0381997	6	28	26	27	9	10	36	30	23	10
X	9624825	0.103051	0.09462	0.0162652	0.0320613	0.0462934	0.10069	0.0941483	0.0212416	0.0259011	0.0470056	9	16	28	15	6	7	21	43	26	12
X	9491145	0.908483	0.050265	0.0102952	0.0102952	0.0296745	0.897246	0.0501253	0.0120037	0.01451	0.0236117	2	17	10	10	14	12	13	13	17	10
X	9363292	0.0666057	0.103763	0.0226866	0.0338059	0.0472702	0.0853659	0.100757	0.0224576	0.0317272	0.046572	68	204	177	152	39	67	202	206	215	50
X	9119768	0.697179	0.0603409	0.00588324	0.0337909	0.0206668	0.728423	0.0558879	0.00890121	0.0271414	0.0198453	5	9	1	7	6	2	14	11	6	8
X	9024365	0.644214	0.0637336	0.00542414	0.0378183	0.0204912	0.60702	0.0633152	0.00883152	0.03125	0.0232337	7	1	3	5	12	10	7	8	6	6

## Sheet: EU TEs
chr	distance to PCH	DPGP3 population frequency	H3K9me2 spread (compared to either wildtype)	extent of H3K9me2 spread (vs RAL315)	magnitude of H3K9me2 increase (vs RAL315)	extent of H3K9me2 spread (vs RAL360)	magnitude of H3K9me2 increase (vs RAL360)	PCH interaction p-value (rep 1)	prop. TE-PCH reads (rep 1)	prop. TE-unique PCH reads (rep 1)	prop. TE- repeat PCH reads (rep 1)	prop. TE-multi PCH reads (rep 1)	PCH interaction p-value (rep 2)	prop. TE-PCH reads (rep 2)	prop. TE-unique PCH reads (rep 2)	prop. TE- repeat PCH reads (rep 2)	prop. TE-multi PCH reads (rep 2)
2L	11938038	0	FALSE	0	0	0	0	0.627426	0.0639934	0.0142208	0.0163704	0.0334022	0.721467	0.0579148	0.011788	0.015156	0.0309709
2L	9165541	0.00534759	FALSE	0	0	0	0	0.703752	0.0607448	0.0101496	0.0125916	0.0380037	0.813859	0.0534734	0.0105711	0.0124245	0.0304778
2L	8897881	0	TRUE	0	0	3	0.0913821	0.486417	0.0697853	0.0095092	0.0131902	0.0470859	0.425272	0.0709942	0.0145665	0.014708	0.0417197
2L	8856637	0.0172414	TRUE	0	0	1	0.128037	0.433376	0.0721897	0.0110396	0.0125756	0.0485744	0.366848	0.0730573	0.0141286	0.0164535	0.0424752
2L	6868636	0.0160428	TRUE	1	0.122401	2	0.10634	0.468305	0.0704849	0.0114877	0.0196931	0.0393042	0.694293	0.0594645	0.0137115	0.0132785	0.0324746
2L	6383970	0	FALSE	0	0	0	0	0.575679	0.0659807	0.0160606	0.0221094	0.0278106	0.57337	0.0646649	0.0145998	0.0173779	0.0326871
2L	5926855	0	TRUE	0	0	3	0.10428	0.467012	0.0705726	0.012783	0.0157124	0.0420772	0.633152	0.0624679	0.0125964	0.0102828	0.0395887
2L	5400695	0	TRUE	3	0.782712	12	1.08817	0.00129366	0.110783	0.0243504	0.0280068	0.0584254	0.00543478	0.108798	0.0224734	0.0307357	0.0555886
2L	4210433	0	TRUE	3	0.702808	3	0.36605	0.084088	0.0897414	0.022872	0.0273787	0.0394907	0.286685	0.0766733	0.0173508	0.0229244	0.036398
2L	4121509	0.00546448	FALSE	0	0	0	0	0.135834	0.0862444	0.0148433	0.0182981	0.053103	0.33288	0.0744727	0.0116229	0.0143134	0.0485364
2L	4073927	0	TRUE	1	0.701357	1	0.497801	0.309185	0.0775702	0.0160603	0.0166066	0.0449033	0.577446	0.0644855	0.0125178	0.0141299	0.0378378
2L	3970095	0.0106952	TRUE	1	0.262909	1	0.0941525	0.80207	0.0549052	0.0105667	0.0149176	0.0294209	0.811141	0.0535635	0.0104102	0.0144141	0.0287392
2L	3732034	0.00534759	TRUE	2	0.153787	2	0.0286021	0.6326	0.0637392	0.0124038	0.0173834	0.033952	0.669837	0.0605108	0.0153242	0.0143026	0.0308841
2L	3485059	0	TRUE	3	0.243873	0	0	0.389392	0.0745327	0.0183154	0.0195395	0.0366778	0.464674	0.0692973	0.018517	0.017951	0.0328293
2L	3440339	0.00537634	TRUE	0	0	1	0.0146289	0.196636	0.0830266	0.0182541	0.023112	0.0416605	0.168478	0.0826665	0.0224853	0.0221546	0.0380266
2L	3261080	0.00552486	FALSE	0	0	0	0	0.463131	0.0708466	0.0181298	0.02304	0.0296768	0.341033	0.0742712	0.0184618	0.022936	0.0328734
2L	2635102	0	TRUE	7	0.41239	4	0.122451	0.646831	0.0629237	0.00816965	0.0119937	0.0427603	0.557065	0.0652539	0.0120445	0.0135691	0.0396402
2L	16298953	0	TRUE	4	0.29746	0	0	0.61837	0.0643134	0.0148416	0.0187859	0.0306859	0.80163	0.0542094	0.0135805	0.0138623	0.0267666
2L	15260184	NA	TRUE	3	0.00502706	3	0.170505	0.0789133	0.0900583	0.0172132	0.0201584	0.0526867	0.100543	0.0864754	0.0169789	0.0211944	0.0483021
2L	13099584	0.00537634	FALSE	0	0	0	0	0.733506	0.0587106	0.0135345	0.0151806	0.0299954	0.820652	0.0529595	0.0110297	0.0133872	0.0285426
2L	13050892	0.162162	TRUE	1	0.255573	0	0	0.252264	0.0802533	0.0121863	0.0139501	0.0541169	0.245924	0.0784102	0.0124779	0.0187938	0.0471386
2L	12627241	0	FALSE	0	0	0	0	0.206986	0.0827178	0.0169709	0.021122	0.0446249	0.20788	0.0806383	0.0181516	0.0220604	0.0404262
2R	5456099	0.0145985	TRUE	1	0.010431	1	0.0139401	0.133641	0.0825522	0.0160844	0.0172561	0.0492118	0.261981	0.0751932	0.0149594	0.0168417	0.0433921
2R	7844084	0.0126582	FALSE	0	0	0	0	0.849462	0.0519928	0.00728155	0.00804803	0.0366633	0.789137	0.0507795	0.00561669	0.00905548	0.0361073
2R	8005507	0.150289	FALSE	0	0	0	0	0.648233	0.0606132	0.012569	0.016093	0.0319511	0.654952	0.0566077	0.0116668	0.0147013	0.0302396
2R	8735821	0.00588235	FALSE	0	0	0	0	0.706605	0.0579806	0.011145	0.00756269	0.0392729	0.805112	0.0495473	0.00792253	0.0115694	0.0300553
2R	8963483	NA	TRUE	1	0.202754	5	0.104946	0.371736	0.0716994	0.0146568	0.0205987	0.0364439	0.292332	0.0735049	0.0149759	0.0212609	0.037268
2R	10506838	0	FALSE	0	0	0	0	0.863287	0.0514078	0.0110808	0.0129579	0.0273691	0.840256	0.047566	0.00975713	0.0123025	0.0255064
2R	11990884	0.00632911	TRUE	2	0.332065	1	0.181736	0.646697	0.060704	0.0112442	0.0140369	0.0354229	0.761981	0.0518926	0.00944678	0.0114526	0.0309932
2R	12043602	0	FALSE	0	0	0	0	0.628264	0.0623075	0.0151437	0.0168763	0.0302875	0.448882	0.0657363	0.0133865	0.0187981	0.0335517
2R	12502857	0	TRUE	0	0	1	0.0391798	0.327189	0.0736076	0.0101455	0.0191716	0.0442905	0.365815	0.0702521	0.0115292	0.0186874	0.0400355
2R	16187811	0	TRUE	9	1.42549	8	1.34801	0.491551	0.0673424	0.00994055	0.014521	0.0428808	0.444089	0.0660204	0.0110907	0.0161558	0.0387739
2R	16199769	0	FALSE	0	0	0	0	0.915515	0.0468275	0.00862984	0.00983235	0.0283653	0.859425	0.046726	0.0093452	0.0118078	0.025573
2R	16378740	0	TRUE	1	0.00154021	0	0	0.729647	0.0566179	0.00582611	0.00642366	0.0443681	0.594249	0.0599674	0.00611912	0.00530324	0.048545
2R	17117284	0.00534759	FALSE	0	0	0	0	0.734255	0.0564861	0.0117179	0.0160745	0.0286938	0.717252	0.0537839	0.0116378	0.0138734	0.0282727
2R	18093874	0	TRUE	5	0.084296	0	0	0.77573	0.0544413	0.00879589	0.0128607	0.0327847	0.761981	0.0519466	0.0100792	0.011796	0.0300714
2R	19071519	0	TRUE	3	1.02761	3	1.12295	0.525346	0.0662725	0.0116408	0.0163218	0.0383099	0.456869	0.0653108	0.0113854	0.0144905	0.0394349
2R	19075798	0	TRUE	5	0.528243	3	0.371361	0.245776	0.0770377	0.0162783	0.0240056	0.0367537	0.279553	0.0742441	0.0151685	0.0232969	0.0357787
2R	3463751	0	FALSE	0	0	0	0	0.71275	0.0577716	0.0140274	0.0165536	0.0271905	0.701278	0.0544478	0.0125373	0.0143284	0.0275821
3L	11814137	0	TRUE	1	0.264779	0	0	0.0270985	0.0981742	0.0216438	0.0274155	0.0491148	0.121526	0.0880193	0.0190007	0.0241873	0.0448313
3L	11526596	0	TRUE	0	0	4	0.0134786	0.0350297	0.0967778	0.0185981	0.0266252	0.0515546	0.0116354	0.103929	0.0226298	0.0291377	0.0521619
3L	11383235	0.0703125	TRUE	0	0	4	0.205928	0.0819564	0.0917431	0.0195603	0.0221568	0.050026	0.0614092	0.0920675	0.0198313	0.0271895	0.0450467
3L	11143170	0	TRUE	0	0	1	0.431467	0.0231328	0.0994593	0.023444	0.0331136	0.0429017	0.0310278	0.0961526	0.0242123	0.0292869	0.0426534
3L	21763025	0.010929	TRUE	8	1.65611	12	1.22223	0.331791	0.077842	0.0149806	0.0218546	0.0410069	0.424047	0.0734204	0.0169309	0.0207952	0.0356944
3L	10240585	0	FALSE	0	0	0	0	0.785195	0.0588495	0.00750331	0.0108872	0.040459	0.870718	0.0510742	0.00932306	0.00905283	0.0326983
3L	10098606	0.0162162	TRUE	1	0.0958803	5	0.0235986	0.288169	0.0797287	0.0183005	0.0189404	0.0424878	0.320621	0.0785158	0.0162848	0.0211702	0.0410608
3L	9749002	0	TRUE	1	0.0191682	0	0	0.65499	0.0645864	0.00881194	0.0164835	0.0392909	0.582418	0.0668127	0.0128448	0.0169272	0.0370407
3L	9601985	0.0387597	FALSE	0	0	0	0	0.67614	0.0637117	0.0133634	0.0123283	0.03802	0.795087	0.0556263	0.0110403	0.0131635	0.0314225
3L	9465666	0	FALSE	0	0	0	0	0.239921	0.0823816	0.0192152	0.0250609	0.0381055	0.202327	0.083928	0.0207522	0.0232477	0.0399282
3L	9275078	0	FALSE	0	0	0	0	0.789822	0.058596	0.0118933	0.0154709	0.0312319	0.797673	0.0553851	0.0109066	0.0137185	0.0307601
3L	9066411	0.0591398	FALSE	0	0	0	0	0.589557	0.0674494	0.0127854	0.0138291	0.040835	0.707822	0.0606134	0.00943682	0.0132478	0.0379287
3L	8257182	0	TRUE	0	0	2	0.15892	0.544613	0.0693698	0.0170119	0.0149846	0.0373733	0.369101	0.0762332	0.0190773	0.0191533	0.0380026
3L	8221403	0	FALSE	0	0	0	0	0.510905	0.0707186	0.0130241	0.0159945	0.0417	0.349063	0.0772874	0.0164248	0.018944	0.0419186
3L	8214107	0.00534759	TRUE	1	0.151276	0	0	0.0118969	0.101917	0.0232842	0.0295082	0.0491248	0.0284421	0.0966562	0.0228935	0.0280232	0.0457395
3L	7927169	0.0374332	FALSE	0	0	0	0	0.979511	0.036926	0.00562324	0.00524836	0.0260544	0.989657	0.0316988	0.00595447	0.00402802	0.0217163
3L	7416310	0.00534759	TRUE	1	0.266242	0	0	0.157964	0.0862561	0.0240162	0.0248484	0.0373915	0.143504	0.0865788	0.0200535	0.0258625	0.0406627
3L	7305321	0	TRUE	3	0.0478694	0	0	0.486451	0.0714408	0.0184327	0.0191196	0.0338886	0.622495	0.0644786	0.0145646	0.0204309	0.0294832
3L	7075855	0	TRUE	2	0.0966522	1	0.0871508	0.189028	0.0846432	0.0198598	0.0177358	0.0470476	0.324499	0.0784135	0.0187351	0.0173643	0.042314
3L	6708209	0	TRUE	2	0.362935	2	0.685635	0.974223	0.0388199	0.00857413	0.0122198	0.0180259	0.970265	0.0379909	0.00966534	0.0105592	0.0177664
3L	6165365	0.00543478	FALSE	0	0	0	0	0.00462657	0.109863	0.0260681	0.0334265	0.0503679	0.0116354	0.103187	0.0251809	0.0317652	0.0462405
3L	5826265	0.108696	TRUE	2	0.385061	2	1.05835	0.892267	0.0517784	0.0121341	0.00879956	0.0308448	0.895281	0.049223	0.0106582	0.0100887	0.0284761
3L	5389785	0	TRUE	1	0.235525	2	0.288115	0.836748	0.0564542	0.012779	0.0072792	0.036396	0.788623	0.0561725	0.0122324	0.01014	0.0338001
3L	4920470	0	FALSE	0	0	0	0	0.0918705	0.0909003	0.0204914	0.024376	0.0460328	0.151907	0.0861143	0.0198116	0.024038	0.0422647
3L	21045932	0	TRUE	2	0.167452	2	0.133491	0.681428	0.0635218	0.0118358	0.0138794	0.0378065	0.743374	0.0587578	0.0121348	0.0134919	0.0331311
3L	20986122	0.00534759	TRUE	5	0.774659	10	1.31577	0.522141	0.0701628	0.0130354	0.0179011	0.0392263	0.648998	0.0634182	0.0128422	0.0157489	0.0348272
3L	20927259	0	TRUE	1	0.358397	4	0.573503	0.934567	0.0466585	0.00806876	0.00868269	0.029907	0.896574	0.0489148	0.00817867	0.0117175	0.0290186
3L	20737063	0	TRUE	8	2.34305	7	2.26654	0.842697	0.0560545	0.00619387	0.00598741	0.0438732	0.865546	0.0514685	0.00481632	0.00793276	0.0387194
3L	20634800	0	FALSE	0	0	0	0	0.619299	0.066161	0.00868135	0.0102349	0.0472448	0.674855	0.0624398	0.0076244	0.0111557	0.0436597
3L	20338306	NA	FALSE	0	0	0	0	0.938533	0.0460575	0.0042987	0.00810612	0.0336527	0.979315	0.0364171	0.00407148	0.00497625	0.0273694
3L	19968859	0	TRUE	3	0.477872	3	0.496201	0.578982	0.0677887	0.0110644	0.0160511	0.0406732	0.586942	0.0666389	0.012356	0.0163126	0.0379703
3L	19854359	0.00534759	FALSE	0	0	0	0	0.55651	0.0688334	0.0108792	0.0160794	0.0418748	0.539108	0.0684323	0.0105936	0.0177778	0.0400609
3L	19707330	0	FALSE	0	0	0	0	0.354263	0.0767361	0.0123843	0.0199074	0.0444444	0.27214	0.0806356	0.0159384	0.0243297	0.0403674
3L	22590742	0	FALSE	0	0	0	0	0.441507	0.0733446	0.0186869	0.0194725	0.0351852	0.471881	0.0712062	0.0151702	0.0224836	0.0335524
3L	19075214	0	TRUE	6	0.387477	7	0.642997	0.511566	0.0706408	0.0100348	0.0133135	0.0472926	0.669037	0.0627084	0.010992	0.0136048	0.0381115
3L	18756643	0	TRUE	15	1.49799	18	2.63058	0.233972	0.0827165	0.0204403	0.0249773	0.0372988	0.418229	0.0736686	0.016568	0.0232882	0.0338123
3L	17523538	0.0162162	TRUE	0	0	2	0.332618	0.69002	0.0631961	0.011914	0.019166	0.032116	0.797673	0.0553911	0.0114426	0.015086	0.0288626
3L	22344771	NA	FALSE	0	0	0	0	0.224058	0.083229	0.0180051	0.0265307	0.0386931	0.12605	0.0876792	0.0182983	0.0282098	0.0411711
3L	22296890	0	TRUE	5	0.44863	0	0.262469	0.645737	0.0649768	0.0143678	0.0178847	0.0327243	0.679379	0.0622013	0.0126435	0.0179116	0.0316463
3L	16301155	0	FALSE	0	0	0	0	0.532056	0.0699149	0.0112378	0.017258	0.0414192	0.590175	0.0663105	0.0128205	0.0183048	0.0351852
3L	14964442	0.0108108	FALSE	0	0	0	0	0.572373	0.068051	0.0139991	0.0157878	0.0382641	0.647705	0.0634795	0.0156713	0.0163934	0.0314147
3L	14153682	0	TRUE	0	0	2	0.324384	0.765367	0.0597722	0.0119904	0.016307	0.0314748	0.809308	0.0547004	0.00971074	0.0166839	0.0283058
3L	13453617	0	TRUE	0	0	1	0.0528519	0.611368	0.0664422	0.0154597	0.0177271	0.0332555	0.590175	0.0664218	0.0154763	0.0204745	0.0304709
3L	13366964	0	FALSE	0	0	0	0	0.934567	0.0465132	0.0113414	0.00877607	0.0263957	0.970265	0.0380987	0.00745147	0.00739138	0.0232558
3R	5842271	0	TRUE	0	0	6	0.607659	0.0452261	0.0889471	0.0231316	0.0269779	0.0388375	0.0782178	0.084658	0.0238215	0.0243712	0.0364653
3R	7981410	0.0160428	TRUE	6	0.519938	8	0.712464	0.727638	0.0540706	0.011443	0.0139762	0.0286513	0.722772	0.0537181	0.0127389	0.0117412	0.029238
3R	10536549	NA	TRUE	0	0	8	0.0493175	0.159799	0.0793457	0.0189616	0.0193685	0.0410156	0.0564356	0.0873235	0.0211392	0.0244733	0.041711
3R	11254082	0.00534759	TRUE	0	0	2	0.505827	0.690452	0.0555164	0.014251	0.0157388	0.0255266	0.626733	0.0578263	0.0140713	0.0180247	0.0257304
3R	11451128	0.138462	TRUE	2	0.368845	3	0.315268	0.470352	0.0655626	0.0166232	0.0194765	0.0294628	0.447525	0.0652743	0.0149472	0.019074	0.0312531
3R	11555471	0	TRUE	1	0.15235	0	0	0.370854	0.0697642	0.0160853	0.020773	0.0329059	0.389109	0.0676231	0.0158201	0.0205118	0.0312912
3R	11952601	0.00534759	TRUE	0	0	3	0.389195	0.976884	0.036375	0.00501725	0.00909376	0.022264	0.971287	0.0345593	0.00793583	0.00802116	0.0186023
3R	14030524	0	TRUE	0	0	4	0.233644	0.0924623	0.0835523	0.0171139	0.0204144	0.0460241	0.0495049	0.088357	0.0195288	0.0227128	0.0461155
3R	14297900	0.0171429	FALSE	0	0	0	0	0.38593	0.0689327	0.0119642	0.014975	0.0419935	0.307921	0.0712772	0.0138457	0.0178016	0.0396298
3R	14310470	0	TRUE	2	0.0328061	2	0.0901671	0.663317	0.0571186	0.00779661	0.0127966	0.0365254	0.682178	0.0550863	0.009343	0.0106136	0.0351297
3R	16292003	1	FALSE	0	0	0	0	0.105528	0.0824833	0.0166173	0.0245146	0.0413513	0.234653	0.0746651	0.0164902	0.0213743	0.0368006
3R	17182349	0	FALSE	0	0	0	0	0.903518	0.0440653	0.00745465	0.0102709	0.0263398	0.782178	0.050559	0.00867679	0.0109294	0.0309528
3R	17338986	0	FALSE	0	0	0	0	0.351759	0.0706678	0.0138381	0.0164814	0.0403483	0.179208	0.0776302	0.013347	0.0209057	0.0433776
3R	18898565	0	TRUE	1	0.176032	2	0.233124	0.718593	0.0543172	0.0127253	0.0123836	0.0292083	0.728713	0.0535757	0.0112209	0.0145397	0.0278151
3R	23548550	0	FALSE	0	0	0	0	0.705528	0.0547975	0.00802627	0.0123313	0.03444	0.8	0.0496992	0.00802206	0.0119077	0.0297694
3R	23587277	0	FALSE	0	0	0	0	0.443216	0.0666364	0.00959357	0.0140662	0.0429766	0.580198	0.0596653	0.0092963	0.0156065	0.0347625
3R	24324772	0.0106952	TRUE	13	1.32827	7	1.063	0.0733668	0.0852942	0.01949	0.0273335	0.0384707	0.141584	0.0799852	0.018668	0.0242087	0.0371086
3R	24773450	0	TRUE	0	0	1	0.0622128	0.658291	0.0573136	0.00486833	0.00619606	0.0462492	0.592079	0.0592071	0.00746661	0.00788726	0.0438532
3R	24804099	0	FALSE	0	0	0	0	0.938693	0.0408619	0.00726257	0.00901836	0.024581	0.958416	0.0368017	0.00803073	0.0105447	0.0182263
3R	5330656	0	TRUE	5	1.13943	5	0.789424	0.20201	0.0774414	0.0167979	0.0168929	0.0437506	0.39802	0.0672535	0.0162852	0.0171655	0.0338028
3R	5399141	0.00534759	TRUE	0	0	3	0.0653421	0.513568	0.0636257	0.0159833	0.0156759	0.0319666	0.608911	0.0585654	0.0151154	0.0152779	0.0281721
X	12444664	0.00540541	TRUE	7	0.776893	7	1.80008	0.304202	0.0794654	0.0157959	0.0238153	0.0398542	0.350937	0.0737317	0.0148816	0.0236753	0.0351747
X	12442048	NA	TRUE	6	2.14685	6	1.92216	0.934454	0.0429614	0.00834202	0.00959333	0.0250261	0.868825	0.0448932	0.00764556	0.0119584	0.0252892
X	12234038	0	TRUE	0	0	2	0.200078	0.932773	0.0430339	0.00860678	0.0112964	0.0231307	0.819421	0.0486648	0.00923384	0.0122286	0.0272024
X	12218387	0	FALSE	0	0	0	0	0.240336	0.0840097	0.0207282	0.0245668	0.0387146	0.402044	0.0714286	0.018705	0.0232271	0.0294964
X	11995157	0	FALSE	0	0	0	0	0.769748	0.0554149	0.0122552	0.0185161	0.0246437	0.752981	0.0523679	0.0124061	0.0150304	0.0249314
X	21515593	0.0106952	TRUE	4	0.137739	4	0.485389	0.769748	0.055454	0.0090392	0.0140158	0.0323989	0.809199	0.049465	0.00994932	0.0138915	0.0256242
X	11164680	0.00540541	FALSE	0	0	0	0	0.440336	0.0722522	0.0141754	0.0189358	0.039141	0.330494	0.0748139	0.0150759	0.0207293	0.0390088
X	21448892	NA	TRUE	0	0	1	0.266651	0.426891	0.0730451	0.0178004	0.020534	0.0347107	0.586031	0.0625606	0.0123753	0.0175078	0.0326775
X	10541932	0	TRUE	0	0	3	0.0384484	0.847059	0.0503704	0.00888889	0.017284	0.0241975	0.763203	0.0518265	0.0125571	0.0148402	0.0244292
X	9739223	0	TRUE	0	0	2	0.272748	0.183193	0.0881846	0.0174644	0.0296464	0.0410737	0.0545145	0.0950852	0.0210219	0.0316302	0.0424331
X	9637385	0	FALSE	0	0	0	0	0.191597	0.0874817	0.0183147	0.0247443	0.0444228	0.325383	0.0751919	0.0158758	0.020499	0.0388172
X	9596494	0.00689655	FALSE	0	0	0	0	0.295798	0.0798683	0.0184547	0.0276438	0.0337698	0.25724	0.0794081	0.0162469	0.0266373	0.0365239
X	9352312	0.0106952	FALSE	0	0	0	0	0.211765	0.0855572	0.0178674	0.0235941	0.0440958	0.120954	0.0893106	0.0198349	0.0280905	0.0413852
X	9077684	0.0169492	TRUE	6	0.575734	11	0.289276	0.32437	0.0781303	0.0151873	0.0197435	0.0431995	0.267462	0.0786654	0.0182124	0.0177533	0.0426997
X	8841266	0.00540541	TRUE	0	0	2	0.018505	0.49916	0.068925	0.0155258	0.0203482	0.033051	0.550256	0.0646336	0.0157161	0.0198793	0.0290383
X	8099476	0	TRUE	7	1.92503	7	1.34	0.633613	0.0623572	0.0122973	0.0156709	0.0343889	0.555366	0.0643962	0.0139949	0.0167352	0.0336661
X	8086489	0	FALSE	0	0	0	0	0.415126	0.0739967	0.013796	0.0221572	0.0380435	0.432709	0.0700672	0.0146395	0.0184145	0.0370132
X	7761718	0	TRUE	3	2.00628	7	2.31726	0.0302521	0.103624	0.0216527	0.0300486	0.0519222	0.0255537	0.101554	0.0241521	0.0320529	0.0453494
X	7615811	0.00534759	TRUE	3	1.00004	11	1.44349	0.0268908	0.104805	0.023348	0.0330183	0.0484384	0.0255537	0.102079	0.0248169	0.032066	0.0451957
X	7427745	0	TRUE	1	0.15385	1	0.723099	0.47395	0.0702836	0.0132552	0.025894	0.0311344	0.558773	0.0642026	0.0169747	0.0180698	0.0291581
X	7101550	0	TRUE	1	0.451258	1	0.325469	0.652101	0.0614248	0.0121306	0.0136745	0.0356198	0.645656	0.0586041	0.0110926	0.0151173	0.0323942
X	21017466	0	TRUE	0	0	3	0.190505	0.554622	0.0659058	0.0138417	0.0193783	0.0326858	0.609881	0.0611264	0.0127434	0.0183839	0.0299992
X	6517513	0	TRUE	1	0.269193	1	0.153836	0.423529	0.0735502	0.0189937	0.0188927	0.0356638	0.436116	0.0698822	0.0160775	0.0207363	0.0330684
X	6429038	0	TRUE	9	0.309506	12	1.03708	0.0151261	0.107985	0.0236627	0.03191	0.0524125	0.0459966	0.097377	0.0210831	0.0304611	0.0458327
X	4434584	0.0698925	TRUE	3	0.239117	3	0.139992	0.594958	0.0638428	0.0130333	0.0156807	0.0351288	0.497445	0.0670982	0.0132972	0.0194209	0.0343802
X	20519643	0	TRUE	0	0	2	0.129449	0.329412	0.0776288	0.0194393	0.0259832	0.0322063	0.364566	0.0732909	0.0156861	0.0224316	0.0351732
X	20277453	0.00543478	TRUE	0	0	7	0.102964	0.357983	0.0762536	0.0184122	0.0253389	0.0325025	0.286201	0.0775687	0.0179325	0.0261169	0.0335193
X	20115533	0.00537634	TRUE	3	0.384632	2	0.599655	0.415126	0.073966	0.0121767	0.0181141	0.0436752	0.546848	0.0648489	0.0130803	0.016857	0.0349116
X	20064512	0	TRUE	11	0.977096	4	0.27905	0.544538	0.0664218	0.0121721	0.0131165	0.0411333	0.534923	0.0652319	0.0136777	0.0167384	0.0348159
X	20010152	0	TRUE	10	0.217657	7	1.0429	0.248739	0.0828016	0.0182101	0.0274708	0.0371206	0.0936968	0.0912514	0.0199094	0.0288431	0.0424989
X	19864298	0	FALSE	0	0	0	0	0.660504	0.0611138	0.0105314	0.0126057	0.0379767	0.722317	0.0545721	0.00965618	0.0119971	0.0329188
X	19847096	0	FALSE	0	0	0	0	0.579832	0.0647362	0.0111969	0.015444	0.0380952	0.459966	0.0690041	0.0151227	0.0166909	0.0371905
X	19834509	0.00534759	TRUE	1	1.13637	1	1.92348	0.32605	0.0780727	0.0188905	0.0217599	0.0374223	0.158433	0.0870612	0.0209629	0.0254764	0.0406219
X	19826096	0.00714286	FALSE	0	0	0	0	0.428571	0.0730298	0.00735552	0.0127846	0.0528897	0.432709	0.0700183	0.0107848	0.0106189	0.0486146
X	19783822	0	TRUE	1	0.846219	1	0.62323	0.277311	0.0809023	0.0219549	0.0222556	0.0366917	0.316865	0.0756615	0.0179162	0.0201213	0.037624
X	22324881	NA	FALSE	0	0	0	0	0.0504202	0.0985393	0.0190123	0.0289821	0.0505449	0.00681431	0.107366	0.0210187	0.030676	0.0556713
X	19428201	0	TRUE	1	0.084402	2	0.0118653	0.415126	0.0739939	0.0139911	0.0183182	0.0416847	0.316865	0.0756066	0.012516	0.0181354	0.0449553
X	19394407	NA	FALSE	0	0	0	0	0.442017	0.0719278	0.0129586	0.0214036	0.0375655	0.407155	0.0710702	0.0143534	0.0199275	0.0367893
X	22302965	0.00537634	FALSE	0	0	0	0	0.0386555	0.101389	0.019246	0.0360119	0.046131	0.0936968	0.0912355	0.0192414	0.0260541	0.04594
X	19368528	0	TRUE	1	0.31036	7	0.962861	0.268908	0.081397	0.0187839	0.0236538	0.0389592	0.112436	0.0900771	0.0209178	0.0273238	0.0418355
X	22285515	0.00537634	FALSE	0	0	0	0	0.163025	0.0896137	0.0182567	0.0253813	0.0459757	0.126065	0.0890832	0.0188365	0.0287231	0.0415236
X	19194852	NA	TRUE	0	0	3	0.0773788	0.154622	0.089944	0.0169519	0.0243581	0.048634	0.127768	0.0889849	0.019377	0.0258608	0.0437472
X	19103232	0.00588235	FALSE	0	0	0	0	0.460504	0.0711971	0.0137208	0.017178	0.0402982	0.459966	0.0690368	0.014871	0.0172346	0.0369313
X	19065268	0.0106952	TRUE	5	1.26979	5	0.999959	0.559664	0.0656521	0.0124513	0.0155955	0.0376053	0.613288	0.0608874	0.0135037	0.0129009	0.0344828
X	18922511	0.012987	TRUE	1	0.489547	2	0.477269	0.394958	0.0748188	0.018055	0.0239365	0.0328272	0.253833	0.0797561	0.0184146	0.0246341	0.0367073
X	17805465	NA	TRUE	4	0.380365	4	0.303678	0.536134	0.0669451	0.0109323	0.0164599	0.0395529	0.570698	0.0636127	0.0123752	0.0162831	0.0349544
X	17746908	0	FALSE	0	0	0	0	0.578151	0.0648927	0.0139832	0.0203638	0.0305458	0.632027	0.0594337	0.0148889	0.0154991	0.0290456
X	17513928	0	FALSE	0	0	0	0	0.354622	0.0764344	0.0170737	0.0206472	0.0387135	0.473595	0.0683527	0.0141832	0.0176008	0.0365687
X	17174644	0	FALSE	0	0	0	0	0.564706	0.0655621	0.00799886	0.006999	0.0505642	0.548552	0.0646812	0.0106271	0.0123327	0.0417213
X	16909085	0.0160428	TRUE	0	0	3	0.0980998	0.470588	0.0708266	0.0177918	0.0185579	0.0344769	0.325383	0.0752826	0.0155991	0.0256971	0.0339864
X	16826760	0.0162162	TRUE	4	0.494507	4	0.743586	0.265546	0.0818257	0.0143914	0.0229441	0.0444901	0.286201	0.0775023	0.0159125	0.0223059	0.0392839
X	16767605	0	TRUE	6	0.250021	3	0.10298	0.541176	0.0664444	0.0120704	0.0201173	0.0342568	0.722317	0.0544376	0.00910824	0.0134505	0.0318788
X	16601721	0	TRUE	1	0.166689	2	0.250037	0.173109	0.0884936	0.0190765	0.0239213	0.0454958	0.153322	0.0876526	0.0179783	0.024152	0.0455224
X	16428571	0	TRUE	4	0.280323	0	0	0.347899	0.0767344	0.0159075	0.0252278	0.0355992	0.448041	0.0696091	0.0156999	0.0224464	0.0314628
X	21945664	0	TRUE	8	0.946116	8	0.807139	0.416807	0.0737292	0.013475	0.0218011	0.0384531	0.313458	0.0759632	0.0157473	0.0217886	0.0384273
X	15776444	0	TRUE	0	0	2	0.00982141	0.0504202	0.0983101	0.0236458	0.0315492	0.0431151	0.044293	0.0978593	0.0243575	0.0289179	0.0445839
X	15246151	0	TRUE	4	0.103046	4	0.181813	0.811765	0.0521004	0.0120022	0.0163666	0.0237316	0.609881	0.0612219	0.0140509	0.0175637	0.0296073
X	14269651	0.0107527	TRUE	0	0	2	0.0256841	0.685714	0.0600956	0.00546324	0.00409743	0.0505349	0.735945	0.0536748	0.00289532	0.00489978	0.0458797
X	13770796	0	FALSE	0	0	0	0	0.480672	0.0699961	0.0148477	0.018897	0.0362514	0.50937	0.0666907	0.0126172	0.0149603	0.0391132
X	13599580	0	TRUE	2	0.21456	3	0.153855	0.285714	0.0803073	0.0157123	0.0226955	0.0418994	0.29983	0.0770228	0.0167441	0.0229016	0.0373771
X	12793923	0	TRUE	1	0.0153744	0	0	0.205042	0.0865734	0.0167963	0.0240539	0.0457232	0.214651	0.0816765	0.0179115	0.0240014	0.0397636
X	12738547	0.0107527	FALSE	0	0	0	0	0.32437	0.0783025	0.0144798	0.0204945	0.0433281	0.332198	0.0746828	0.0175785	0.0202829	0.0368213

## Sheet: FISH
PCH-PCH interaction			EU-PCH interaction			TE-PCH interaction				1,6-hexandiol treatment
distance between foci (um)	oligo		distance between foci (um)	oligo		distance between foci (um)	genotype	oligo		distance between foci (um)	nulcear size (um)	relative distance	genotype	treatment
0.99	3R-4		0.79	CEU1		1.83	RAL315	TE1		2.1	4.18	0.502392	ORw1118	EPS
0.5	3R-4		3.27	CEU1		1.69	RAL315	TE1		0.23	6.68	0.0344311	ORw1118	EPS
0.38	3R-4		2.86	CEU1		1.11	RAL315	TE1		1.14	3.81	0.299213	ORw1118	EPS
0.74	3R-4		2.04	CEU1		2.43	RAL315	TE1		0.52	3.84	0.135417	ORw1118	EPS
0.48	3R-4		3.67	CEU1		2.42	RAL315	TE1		1.72	5.05	0.340594	ORw1118	EPS
3.03	3R-4		2.07	CEU1		1.5	RAL315	TE1		1.72	4.46	0.38565	ORw1118	EPS
0.57	3R-4		2.98	CEU1		1.89	RAL315	TE1		1.93	4.92	0.392276	ORw1118	EPS
0.75	3R-4		3.2	CEU1		0.71	RAL315	TE1		1.35	4.07	0.331695	ORw1118	EPS
0.29	3R-4		2.44	CEU1		1.93	RAL315	TE1		0.66	3.41	0.193548	ORw1118	EPS
1.19	3R-4		2.44	CEU1		0.95	RAL315	TE1		2.18	5.12	0.425781	ORw1118	EPS
0.19	3R-4		3.97	CEU1		2.59	RAL315	TE1		2.23	4.89	0.456033	ORw1118	EPS
0.34	3R-4		3.95	CEU1		2.17	RAL315	TE1		0	2.7	0	ORw1118	EPS
0.88	3R-4		1.95	CEU1		1.86	RAL315	TE1		1.86	3.02	0.615894	ORw1118	EPS
0.21	3R-4		3.17	CEU1		2.52	RAL315	TE1		0.59	3.83	0.154047	ORw1118	EPS
0.47	3R-4		1.93	CEU1		2.2	RAL315	TE1		2.35	3.94	0.596447	ORw1118	EPS
0.46	3R-4		1.3	CEU1		1.78	RAL315	TE1		0.96	5.46	0.175824	ORw1118	EPS
0.33	3R-4		1.43	CEU1		3.13	RAL315	TE1		1.35	6.23	0.216693	ORw1118	EPS
0.33	3R-4		1.26	CEU1		3.56	RAL315	TE1		0.42	2.93	0.143345	ORw1118	EPS
2.01	3R-4		0.72	CEU1		2.22	RAL315	TE1		0.61	3.22	0.189441	ORw1118	EPS
0.24	3R-4		0.75	CEU1		2.89	RAL315	TE1		1.33	5.29	0.251418	ORw1118	EPS
0	3R-4		2.38	CEU1		2.17	RAL315	TE1		0.52	4.87	0.106776	ORw1118	EPS
0.8	3R-4		3.18	CEU1		1.81	RAL315	TE1		2	3.72	0.537634	ORw1118	EPS
0.38	3R-4		3.54	CEU1		1.5	RAL315	TE1		1.66	4.41	0.376417	ORw1118	EPS
0	3R-4		3.86	CEU1		1.67	RAL315	TE1		1.23	4	0.3075	ORw1118	EPS
0	3R-4		1.23	CEU1		1.88	RAL315	TE1		0.66	5.19	0.127168	ORw1118	EPS
0.88	3R-4		3.49	CEU1		2.48	RAL315	TE1		1.66	6.81	0.243759	ORw1118	EPS
0	3R-4		1.17	CEU1		1.78	RAL315	TE1		1.91	4.77	0.400419	ORw1118	EPS
0.59	3R-4		1.48	CEU1		1.34	RAL315	TE1		1.31	5.21	0.25144	ORw1118	EPS
0.77	3R-4		0.75	CEU1		1.52	RAL315	TE1		3.22	4.17	0.772182	ORw1118	EPS
0	3R-4		2.15	CEU1		0.83	RAL315	TE1		1.41	5.39	0.261596	ORw1118	EPS
0.44	3R-4		2.52	CEU1		1.5	RAL315	TE1		0.66	3.85	0.171429	ORw1118	EPS
0.79	3R-4		1.49	CEU1		1.43	RAL315	TE1		0.33	3.18	0.103774	ORw1118	EPS
0.27	3R-4		0	CEU1		2.04	RAL315	TE1		0.1	2.94	0.0340136	ORw1118	EPS
0.75	3R-4		2.11	CEU1		1.81	RAL315	TE1		1.45	4.06	0.357143	ORw1118	EPS
1.32	3R-4		0.44	CEU1		1.53	RAL315	TE1		2.08	4.48	0.464286	ORw1118	EPS
0.56	3R-4		3.11	CEU1		1.15	RAL315	TE1		0	3.88	0	ORw1118	EPS
0	3R-4		0.42	CEU1		1.88	RAL315	TE1		0.81	3.72	0.217742	ORw1118	EPS
0	3R-4		1.92	CEU1		1.73	RAL315	TE1		1.77	4	0.4425	ORw1118	EPS
0.29	3R-4		4.69	CEU1		2.07	RAL315	TE1		2.42	4.45	0.54382	ORw1118	EPS
1.67	3R-4		2.7	CEU1		1.88	RAL315	TE1		2.11	4.3	0.490698	ORw1118	EPS
0	3R-4		0	CEU1		0.59	RAL315	TE1		2.09	5.55	0.376577	ORw1118	EPS
0	3R-4		2.1	CEU1		1.08	RAL315	TE1		0.15	4.03	0.0372208	ORw1118	EPS
0.71	3R-4		1.86	CEU1		1.3	RAL315	TE1		1.13	5.06	0.22332	ORw1118	EPS
0	3R-4		1.63	CEU1		2.57	RAL315	TE1		1	3.44	0.290698	ORw1118	EPS
0.53	3R-4		1.98	CEU1		1.45	RAL315	TE1		1.61	3.6	0.447222	ORw1118	EPS
0	3R-4		1.59	CEU1		1.73	RAL315	TE1		0.92	3.68	0.25	ORw1118	EPS
1	3R-4		1.68	CEU1		1.53	RAL315	TE1		1.48	4.05	0.365432	ORw1118	EPS
1.23	3R-4		2.27	CEU1		1.64	RAL315	TE1		3	3.97	0.755668	ORw1118	EPS
0.86	3R-4		0.86	CEU1		1.53	RAL315	TE1		1.62	3.91	0.414322	ORw1118	EPS
0.88	3R-4		2.65	CEU1		0	RAL315	TE1		3.07	4	0.7675	ORw1118	EPS
0	3R-4		2.93	CEU1		1.42	ORw1118	TE1		1.12	3.65	0.306849	ORw1118	EPS
0.84	3R-4		3.84	CEU1		2.81	ORw1118	TE1		1.72	3.53	0.487252	ORw1118	EPS
0	3R-4		2.65	CEU1		1.68	ORw1118	TE1		1.27	3.11	0.40836	ORw1118	EPS
0.86	3R-4		2.91	CEU1		1.5	ORw1118	TE1		0.3	3.18	0.0943396	ORw1118	EPS
0	3R-4		3.79	CEU1		1.23	ORw1118	TE1		0.2	3.22	0.0621118	ORw1118	EPS
0.69	3R-4		3.42	CEU1		1.36	ORw1118	TE1		2.4	4	0.6	ORw1118	EPS
0.46	3R-4		3.59	CEU1		2.09	ORw1118	TE1		2.44	3	0.813333	ORw1118	EPS
0.44	3R-4		2.83	CEU1		1.74	ORw1118	TE1		1.57	5.29	0.296786	ORw1118	EPS
0.48	3R-4		2.38	CEU1		1.36	ORw1118	TE1		1.8	4.6	0.391304	ORw1118	EPS
0.27	3R-4		1.96	CEU1		1.02	ORw1118	TE1		0.22	3.24	0.0679012	ORw1118	EPS
0.48	3R-4		2.55	CEU1		1.06	ORw1118	TE1		1.41	3.84	0.367188	ORw1118	EPS
0	3R-4		1.15	CEU1		2.45	ORw1118	TE1		0.9	3.49	0.25788	ORw1118	EPS
0	3R-4		1.8	CEU1		0.51	ORw1118	TE1		1.85	3.87	0.478036	ORw1118	EPS
0.79	3R-4		2.19	CEU1		0.36	ORw1118	TE1		1.25	3.38	0.369822	ORw1118	EPS
0	3R-4		2.06	CEU1		0.44	ORw1118	TE1		1.31	4.85	0.270103	ORw1118	EPS
0.8	3R-4		2.46	CEU1		1.65	ORw1118	TE1		0.72	3.81	0.188976	ORw1118	EPS
0.27	3R-4		3.36	CEU1		1.58	ORw1118	TE1		1.31	4.63	0.282937	ORw1118	EPS
0.95	3R-4		2.89	CEU1		1.58	ORw1118	TE1		2.12	4.41	0.480726	ORw1118	EPS
0.56	3R-4		1.5	CEU1		2.51	ORw1118	TE1		0	4.09	0	ORw1118	EPS
1.52	3R-4		2.6	CEU1		2.08	ORw1118	TE1		1.18	4.27	0.276347	ORw1118	EPS
0	3R-4		1.49	CEU1		1.5	ORw1118	TE1		0.42	3.76	0.111702	ORw1118	EPS
1.36	3R-4		2.61	CEU1		1.5	ORw1118	TE1		1.92	2.9	0.662069	ORw1118	EPS
0.89	3R-4		2.38	CEU1		2.05	ORw1118	TE1		1.19	4.61	0.258134	ORw1118	EPS
0.73	3R-4		1.97	CEU1		0	ORw1118	TE1		1.66	3.6	0.461111	ORw1118	EPS
1.12	3R-4		1.13	CEU1		1.4	ORw1118	TE1		2.45	3.86	0.634715	ORw1118	EPS
0.75	3R-4		1.17	CEU1		1.21	ORw1118	TE1		3.92	4.79	0.818372	ORw1118	EPS
0.57	3R-4		1.77	CEU1		2.18	ORw1118	TE1		2.1	5.22	0.402299	ORw1118	EPS
0.24	3R-4		1.73	CEU1		3.03	ORw1118	TE1		2.33	4.69	0.496802	ORw1118	EPS
0	3R-4		2.61	CEU1		1.44	ORw1118	TE1		1.66	4.2	0.395238	ORw1118	EPS
0.59	3R-4		1.8	CEU1		0	ORw1118	TE1		1.16	4.27	0.271663	ORw1118	EPS
0.62	3R-4		2.75	CEU1		1.51	ORw1118	TE1		0.33	3.44	0.0959302	ORw1118	EPS
1.34	3R-4		1.36	CEU1		1.69	ORw1118	TE1		0	4.32	0	ORw1118	EPS
0.84	3R-4		3.87	CEU1		1.77	ORw1118	TE1		0.83	3.88	0.213918	ORw1118	EPS
0	3R-4		2.37	CEU1		2.98	ORw1118	TE1		0.75	3.57	0.210084	ORw1118	EPS
1.22	3R-4		1.46	CEU1		2.18	ORw1118	TE1		1.56	3.84	0.40625	ORw1118	EPS
0.27	3R-4		1.62	CEU1		1.9	ORw1118	TE1		1.57	3.12	0.503205	ORw1118	EPS
0.73	3R-4		2.22	CEU1		1.9	ORw1118	TE1		2.32	4.74	0.489451	ORw1118	EPS
0	3R-4		2.73	CEU1		0	ORw1118	TE1		1.17	6.5	0.18	ORw1118	EPS
0.24	3R-4		3.59	CEU1		2.19	ORw1118	TE1		1.41	7.46	0.189008	ORw1118	EPS
0.73	3R-4		3.09	CEU1		1.4	ORw1118	TE1		2.3	5.52	0.416667	ORw1118	EPS
0	3R-4		0.94	CEU1		1.72	ORw1118	TE1		0	3.12	0	ORw1118	EPS
1.4	3R-4		0	CEU1		1.49	ORw1118	TE1		0.52	2.74	0.189781	ORw1118	EPS
0.35	3R-4		2.19	CEU1		1.42	ORw1118	TE1		0	6.17	0	ORw1118	EPS
0.52	3R-4		0.56	CEU1		0.92	ORw1118	TE1		0	8.1	0	ORw1118	EPS
1.27	3R-4		3.09	CEU1		0	ORw1118	TE1		2.97	6.97	0.426112	ORw1118	EPS
0.57	3R-4		2	CEU1		2.51	ORw1118	TE1		0.59	3.54	0.166667	ORw1118	EPS
0	3R-4		2.67	CEU1		3.32	ORw1118	TE1		1.25	4.61	0.27115	ORw1118	EPS
0	3R-4		0	CEU1		1.94	ORw1118	TE1		1.25	4.49	0.278396	ORw1118	EPS
0.61	3R-4		2.99	CEU1		0	ORw1118	TE1		1.88	5.01	0.37525	ORw1118	EPS
0.27	3R-4		3.12	CEU1		0.95	ORw1118	TE1		3.37	4.71	0.715499	ORw1118	EPS
0	3R-4		2.85	CEU1		1.93	ORw1118	TE1		2.57	5	0.514	ORw1118	EPS
0.56	3R-4		1.68	CEU1		1.33	ORw1118	TE1		0.37	4.27	0.0866511	ORw1118	EPS
0	3R-2R		3.63	CEU1		2.38	ORw1118	TE1		0.59	4.39	0.134396	ORw1118	EPS
1.21	3R-2R		2.83	CEU1		2.07	ORw1118	TE1		1.57	4.69	0.334755	ORw1118	EPS
1.59	3R-2R		1.85	CEU1		1.66	ORw1118	TE1		0	5.69	0	ORw1118	EPS
1.13	3R-2R		1.24	CEU1		1.4	ORw1118	TE1		1.45	5.04	0.287698	ORw1118	EPS
0.69	3R-2R		2.09	CEU1		2.36	ORw1118	TE1		0.89	6.22	0.143087	ORw1118	EPS
1.49	3R-2R		2.85	CEU1		1.11	ORw1118	TE1		1.42	5.19	0.273603	ORw1118	EPS
1.81	3R-2R		3.53	CEU1		2.36	ORw1118	TE1		2.08	3.66	0.568306	ORw1118	EPS
0	3R-2R		2.05	CEU1		1.09	ORw1118	TE1		1.94	4.78	0.405858	ORw1118	EPS
0.44	3R-2R		1.58	CEU1		0.71	ORw1118	TE1		2.78	4.73	0.587738	ORw1118	EPS
1.06	3R-2R		1.59	CEU1		1.88	ORw1118	TE1		0.61	3.73	0.163539	ORw1118	EPS
0.59	3R-2R		0	CEU1		2.05	ORw1118	TE1		2.61	6.31	0.413629	ORw1118	EPS
1.64	3R-2R		0.69	CEU1		0	ORw1118	TE1		0	5.56	0	ORw1118	EPS
1.87	3R-2R		4.25	CEU1		2.55	RAL315	TE1		0	3.85	0	ORw1118	EPS
0.92	3R-2R		1.45	CEU1		2.18	RAL315	TE1		1.18	3.23	0.365325	ORw1118	EPS
0.83	3R-2R		1.86	CEU2		0.66	RAL315	TE1		1.25	3.72	0.336022	ORw1118	EPS
1.24	3R-2R		2.79	CEU2		1.65	RAL315	TE1		0.44	3	0.146667	ORw1118	EPS
0.75	3R-2R		0	CEU2		3.03	RAL315	TE1		1.76	4.32	0.407407	ORw1118	EPS
0	3R-2R		0.39	CEU2		1.41	RAL315	TE1		0.98	4.94	0.198381	ORw1118	EPS
1.5	3R-2R		3.97	CEU2		1.14	RAL315	TE1		0.84	4.88	0.172131	ORw1118	EPS
0.68	3R-2R		0	CEU2		1.78	RAL315	TE1		2.89	4.88	0.592213	ORw1118	EPS
0.59	3R-2R		1.89	CEU2		0.45	RAL315	TE1		0.73	4.73	0.154334	ORw1118	EPS
0	3R-2R		2.73	CEU2		1.74	RAL315	TE1		1.64	2.81	0.58363	ORw1118	EPS
1.45	3R-2R		1.9	CEU2		1.45	RAL315	TE1		1.04	5.3	0.196226	ORw1118	EPS
1.38	3R-2R		3.73	CEU2		0.95	RAL315	TE1		0.86	4.73	0.181818	ORw1118	EPS
1.26	3R-2R		1.86	CEU2		1.62	RAL315	TE1		1.3	4.61	0.281996	ORw1118	EPS
1.24	3R-2R		4.8	CEU2		1.8	RAL315	TE1		2.41	6.02	0.400332	ORw1118	EPS
1.14	3R-2R		3.58	CEU2		1.93	RAL315	TE1		2.1	4.37	0.480549	ORw1118	EPS
0.28	3R-2R		1.79	CEU2		2.6	RAL315	TE1		1.04	4.27	0.24356	ORw1118	EPS
0.4	3R-2R		2.99	CEU2		1.85	RAL315	TE1		0.73	8.59	0.0849825	ORw1118	EPS
0.87	3R-2R		4.05	CEU2		2.02	RAL315	TE1		0.7	3.64	0.192308	ORw1118	EPS
0.94	3R-2R		1.73	CEU2		1.42	RAL315	TE1		0	4.86	0	ORw1118	EPS
0	3R-2R		2.58	CEU2		1.3	RAL315	TE1		0.83	3.61	0.229917	ORw1118	EPS
1.62	3R-2R		3.34	CEU2		1.63	RAL315	TE1		0.5	3.14	0.159236	ORw1118	EPS
0.42	3R-2R		3.43	CEU2		1.69	RAL315	TE1		0.35	3	0.116667	ORw1118	EPS
2.09	3R-2R		2.45	CEU2		1.74	RAL315	TE1		0	4	0	ORw1118	EPS
0.86	3R-2R		3.12	CEU2		2.32	RAL315	TE1		1.25	2.5	0.5	ORw1118	EPS
0.92	3R-2R		2.04	CEU2		1.2	RAL315	TE1		1.28	2.7	0.474074	ORw1118	EPS
1.13	3R-2R		1.41	CEU2		1.95	RAL315	TE1		1.58	3.91	0.404092	ORw1118	EPS
1.15	3R-2R		1.49	CEU2		2.88	RAL315	TE1		0.07	3.81	0.0183727	ORw1118	EPS
1.35	3R-2R		2.25	CEU2		2.13	RAL315	TE1		1.96	4.17	0.470024	ORw1118	EPS
0.86	3R-2R		2.33	CEU2		1.39	RAL315	TE1		1.71	3.82	0.447644	ORw1118	EPS
0.51	3R-2R		2.9	CEU2		0	RAL315	TE1		2	3.45	0.57971	ORw1118	EPS
0.69	3R-2R		1.11	CEU2		2.11	RAL315	TE1		0.94	4.5	0.208889	ORw1118	EPS
0	3R-2R		3.08	CEU2		1.67	RAL315	TE1		0.46	4.04	0.113861	ORw1118	EPS
0.4	3R-2R		1.26	CEU2		1.55	RAL315	TE1		2.39	4.86	0.49177	ORw1118	EPS
0.74	3R-2R		3.69	CEU2		1.37	RAL315	TE1		2.83	5.19	0.545279	ORw1118	EPS
0	3R-2R		3.2	CEU2		1.83	RAL315	TE1		1.51	4.65	0.324731	ORw1118	EPS
0.84	3R-2R		2.48	CEU2		2.15	RAL315	TE1		2.68	5	0.536	ORw1118	EPS
0.96	3R-2R		2.94	CEU2		2.35	RAL315	TE1		1.58	4.7	0.33617	ORw1118	EPS
0.46	3R-2R		3.44	CEU2		0	RAL315	TE1		0.93	4.76	0.195378	ORw1118	EPS
0	3R-2R		2.67	CEU2		1.77	RAL315	TE1		0.23	4.49	0.0512249	ORw1118	EPS
0.97	3R-2R		1.37	CEU2		1.5	RAL315	TE1		0.66	3.6	0.183333	ORw1118	EPS
0.53	3R-2R		3.44	CEU2		1.85	RAL315	TE1		2.49	3.34	0.745509	ORw1118	EPS
0.56	3R-2R		2.05	CEU2		2.3	RAL315	TE1		0	3.7	0	ORw1118	EPS
1.13	3R-2R		3.23	CEU2		0.8	RAL315	TE1		1.35	4.81	0.280665	ORw1118	EPS
2.18	3R-2R		4.26	CEU2		2.17	RAL315	TE1		2.45	3.68	0.665761	ORw1118	EPS
0.89	3R-2R		1.34	CEU2		1.22	RAL315	TE1		0.84	4.16	0.201923	ORw1118	EPS
0	3R-2R		0	CEU2		2.3	RAL315	TE1		0.66	3.77	0.175066	ORw1118	EPS
2.27	3R-2R		3.95	CEU2		2.71	RAL315	TE1		2.41	3.22	0.748447	ORw1118	EPS
1.85	3R-2R		3.88	CEU2		1.62	RAL315	TE1		1.69	4.4	0.384091	ORw1118	EPS
0.73	3R-2R		3.62	CEU2		2.75	RAL315	TE1		1.35	5.42	0.249077	ORw1118	EPS
0	3R-2R		3.45	CEU2		1.42	RAL315	TE1		1.71	3.89	0.439589	ORw1118	EPS
0	3R-2R		1.87	CEU2		1.49	ORw1118	TE1		1.88	5.42	0.346863	ORw1118	EPS
0.96	3R-2R		1.8	CEU2		2.02	ORw1118	TE1		1.67	3.42	0.488304	ORw1118	EPS
0.9	3R-2R		2.67	CEU2		1.28	ORw1118	TE1		0	2.91	0	ORw1118	EPS
1.41	3R-2R		2.36	CEU2		2.46	ORw1118	TE1		0.84	3.84	0.21875	ORw1118	EPS
0	3R-2R		2.74	CEU2		1.44	ORw1118	TE1		1.04	2.88	0.361111	ORw1118	EPS
0.51	3R-2R		2.29	CEU2		1.55	ORw1118	TE1		1.8	2.72	0.661765	ORw1118	EPS
0	3R-2R		2.95	CEU2		0	ORw1118	TE1		0	3.48	0	ORw1118	EPS
1.21	3R-2R		1.47	CEU2		0	ORw1118	TE1		2.13	4.64	0.459052	ORw1118	EPS
0	3R-2R		3	CEU2		1.34	ORw1118	TE1		0	2.94	0	ORw1118	EPS
0.84	3R-2R		3.87	CEU2		1.62	ORw1118	TE1		0.59	2.58	0.228682	ORw1118	EPS
1.45	3R-2R		3.34	CEU2		0	ORw1118	TE1		1.98	5.39	0.367347	ORw1118	EPS
0.77	3R-2R		3.07	CEU2		0	ORw1118	TE1		1.53	3.06	0.5	ORw1118	EPS
1.19	3R-2R		3.71	CEU2		2.47	ORw1118	TE1		4.05	4.15	0.975904	ORw1118	EPS
1.07	3R-2R		1.55	CEU2		3.14	ORw1118	TE1		2.23	5.62	0.396797	ORw1118	EPS
0.8	3R-2R		2.73	CEU2		0	ORw1118	TE1		1.83	5.32	0.343985	ORw1118	EPS
1.46	3R-2R		1.45	CEU2		1.55	ORw1118	TE1		0.56	3.79	0.147757	ORw1118	EPS
0	3R-2R		2.87	CEU2		0.92	ORw1118	TE1		2.11	5.42	0.389299	ORw1118	EPS
0.53	3R-2R		3.59	CEU2		2.55	ORw1118	TE1		1.66	4.5	0.368889	ORw1118	EPS
0.77	3R-2R		2.98	CEU2		0	ORw1118	TE1		1.43	5.68	0.251761	ORw1118	EPS
0	3R-2R		3.74	CEU2		1.5	ORw1118	TE1		0.2	5.09	0.0392927	ORw1118	EPS
0.15	3R-2R		2.95	CEU2		3.5	ORw1118	TE1		1.46	3.15	0.463492	ORw1118	EPS
1.39	3R-2R		3.38	CEU2		2.42	ORw1118	TE1		2.46	5.21	0.472169	ORw1118	EPS
0.98	3R-2R		1.93	CEU2		0	ORw1118	TE1		0.93	4.55	0.204396	ORw1118	EPS
0.87	3R-2R		0.93	CEU2		1.86	ORw1118	TE1		1.47	3.06	0.480392	ORw1118	EPS
1.12	3R-2R		5.19	CEU2		0	ORw1118	TE1		3.03	6.68	0.453593	ORw1118	EPS
1.26	3R-2R		2.22	CEU2		0	ORw1118	TE1		1.24	3.64	0.340659	ORw1118	EPS
0.98	3R-2R		1.13	CEU2		3.79	ORw1118	TE1		0.69	4.73	0.145877	ORw1118	EPS
0.68	3R-2R		3.1	CEU2		0	ORw1118	TE1		0.69	5.78	0.119377	ORw1118	EPS
0.61	3R-2R		3.54	CEU2		1.33	ORw1118	TE1		2	5.26	0.380228	ORw1118	EPS
1.29	3R-2R		2.3	CEU2		4.52	ORw1118	TE1		1.66	5.65	0.293805	ORw1118	EPS
0.53	3R-2R		3.35	CEU2		0	ORw1118	TE1		2.66	5.41	0.491682	ORw1118	EPS
1.24	2R-4		2.32	CEU2		1.1	ORw1118	TE1		1.49	4.91	0.303462	ORw1118	EPS
1.32	2R-4		2.05	CEU2		1.52	ORw1118	TE1		0.93	4.5	0.206667	ORw1118	EPS
0.86	2R-4		3.8	CEU2		0	ORw1118	TE1		1.8	5.05	0.356436	ORw1118	EPS
1.22	2R-4		2.73	CEU2		1.47	ORw1118	TE1		0	2.9	0	ORw1118	EPS
2.37	2R-4		2.86	CEU2		1.6	ORw1118	TE1		0.98	2.66	0.368421	ORw1118	EPS
0.26	2R-4		1.62	CEU2		1.26	ORw1118	TE1		1.54	4.08	0.377451	ORw1118	EPS
0.92	2R-4		1.76	CEU2		1.96	ORw1118	TE1		1.94	4.08	0.47549	ORw1118	EPS
0.74	2R-4		3.71	CEU2		1.51	ORw1118	TE1		0.25	3.02	0.0827815	ORw1118	EPS
0.21	2R-4		2.41	CEU2		0	ORw1118	TE1		1.48	3.39	0.436578	ORw1118	EPS
0.81	2R-4		1.45	CEU2		1.24	ORw1118	TE1		1.98	4.12	0.480583	ORw1118	EPS
0.28	2R-4		2.06	CEU2		2.25	ORw1118	TE1		0.62	5.05	0.122772	ORw1118	EPS
0	2R-4		2.9	CEU2		2.2	ORw1118	TE1		1.82	5.1	0.356863	ORw1118	EPS
0.88	2R-4		2.32	CEU2		1.54	ORw1118	TE1		1.03	3.15	0.326984	ORw1118	EPS
1.24	2R-4		3.34	CEU2		1.51	ORw1118	TE1		0.9	5.17	0.174081	ORw1118	EPS
0.51	2R-4		2.2	CEU2		2.3	ORw1118	TE1		2.91	4.36	0.667431	ORw1118	EPS
0	2R-4		2.14	CEU2		0	ORw1118	TE1		1.31	5.43	0.241252	ORw1118	EPS
0.48	2R-4		2.81	CEU2		1.68	ORw1118	TE1		1.31	4.56	0.287281	ORw1118	EPS
0.88	2R-4		6.09	CEU2		0.56	ORw1118	TE1		2.18	3.23	0.674923	ORw1118	EPS
1.86	2R-4		2.33	CEU2		1.71	ORw1118	TE1		1.18	5.33	0.221388	ORw1118	EPS
0.29	2R-4		3.5	CEU2		1.56	ORw1118	TE1		3	5.04	0.595238	ORw1118	EPS
1.32	2R-4		3.12	CEU2		1.64	ORw1118	TE1		0.97	4.15	0.233735	ORw1118	EPS
1.08	2R-4		2.59	CEU2		2.31	RAL315	TE2		1.84	4	0.46	ORw1118	EPS
0.77	2R-4		3.92	CEU2		2.77	RAL315	TE2		1.65	4.63	0.356371	ORw1118	EPS
0.92	2R-4		3.43	CEU2		3.42	RAL315	TE2		1.5	4.28	0.350467	ORw1118	EPS
0.37	2R-4		0.9	CEU2		3.4	RAL315	TE2		0	5.6	0	ORw1118	EPS
0	2R-4		3.24	CEU2		1.6	RAL315	TE2		2.37	5.93	0.399663	ORw1118	EPS
0.62	2R-4		2.87	CEU2		1.28	RAL315	TE2		2.53	4.19	0.603819	ORw1118	EPS
1.96	2R-4		3.65	CEU2		2.7	RAL315	TE2		0.64	2.46	0.260163	ORw1118	EPS
0.6	2R-4		2.88	CEU2		1.31	RAL315	TE2		1.95	4.05	0.481481	ORw1118	EPS
1.6	2R-4		2.24	CEU2		2.78	RAL315	TE2		0.9	5.2	0.173077	ORw1118	EPS
1.94	2R-4		1.16	CEU2		2.68	RAL315	TE2		0.65	4.22	0.154028	ORw1118	EPS
0.92	2R-4		3.27	CEU2		1.53	RAL315	TE2		1.67	3.84	0.434896	ORw1118	EPS
0.56	2R-4		4.56	CEU2		2.76	RAL315	TE2		1.03	5.41	0.190388	ORw1118	EPS
1.12	2R-4		2.92	CEU2		2.37	RAL315	TE2		0.71	5.05	0.140594	ORw1118	EPS
0.48	2R-4		2.29	CEU2		3.18	RAL315	TE2		4.55	7.03	0.647226	ORw1118	EPS
0.99	2R-4		2.36	CEU2		2.54	RAL315	TE2		0.61	7.47	0.08166	ORw1118	EPS
0	2R-4		2.88	CEU2		3.69	RAL315	TE2		1.16	8	0.145	ORw1118	EPS
1.8	2R-4		2.66	CEU2		3.13	RAL315	TE2		1.87	4.84	0.386364	ORw1118	EPS
1.1	2R-4		2.93	CEU2		2.51	RAL315	TE2		0.1	5.54	0.0180505	RAL315	EPS
1.12	2R-4		2.97	CEU2		1.31	RAL315	TE2		3.4	5.82	0.584192	RAL315	EPS
0	2R-4		2.36	CEU3		1.58	RAL315	TE2		0.53	7.48	0.0708556	RAL315	EPS
0.21	2R-4		0.8	CEU3		2.91	RAL315	TE2		1.73	4.46	0.387892	RAL315	EPS
0.51	2R-4		3.59	CEU3		1.67	RAL315	TE2		0.62	4.33	0.143187	RAL315	EPS
1	2R-4		3.96	CEU3		2.85	RAL315	TE2		2.54	3.82	0.664921	RAL315	EPS
0.42	2R-4		1.6	CEU3		3.7	RAL315	TE2		0.52	4.3	0.12093	RAL315	EPS
1.27	2R-4		2.05	CEU3		2.62	RAL315	TE2		1.47	4.03	0.364764	RAL315	EPS
0.86	2R-4		2.51	CEU3		3.12	RAL315	TE2		1.84	3.76	0.489362	RAL315	EPS
1.31	2R-4		1.67	CEU3		2.15	RAL315	TE2		1.98	4.51	0.439024	RAL315	EPS
0.44	2R-4		3.64	CEU3		1.66	RAL315	TE2		2.14	3.58	0.597765	RAL315	EPS
0.37	2R-4		3.12	CEU3		1.42	RAL315	TE2		0.46	3.8	0.121053	RAL315	EPS
0.26	2R-4		3.53	CEU3		2.3	RAL315	TE2		1.79	4.3	0.416279	RAL315	EPS
0.53	2R-4		2.4	CEU3		2.82	RAL315	TE2		0.43	4.37	0.0983982	RAL315	EPS
1.23	2R-4		3.24	CEU3		4.58	RAL315	TE2		1.08	2.79	0.387097	RAL315	EPS
2.26	2R-4		2.18	CEU3		0.9	RAL315	TE2		1.66	4.15	0.4	RAL315	EPS
0.8	2R-4		1.97	CEU3		2.01	RAL315	TE2		1.27	4.48	0.283482	RAL315	EPS
0.47	2R-4		2.44	CEU3		3.1	RAL315	TE2		2.55	4.86	0.524691	RAL315	EPS
1.24	2R-4		3.74	CEU3		2.75	RAL315	TE2		1.86	3.81	0.488189	RAL315	EPS
1.06	2R-4		1.49	CEU3		3.2	RAL315	TE2		1.71	4.33	0.394919	RAL315	EPS
0.34	2R-4		3.46	CEU3		0	RAL315	TE2		2.52	3.49	0.722063	RAL315	EPS
1.43	2R-4		2.65	CEU3		2.11	RAL315	TE2		1.98	4.33	0.457275	RAL315	EPS
1.39	2R-4		1.2	CEU3		1.34	RAL315	TE2		1.66	4	0.415	RAL315	EPS
2.03	2R-4		2.92	CEU3		1.06	RAL315	TE2		1.8	3.54	0.508475	RAL315	EPS
1.15	2R-4		2.63	CEU3		3.05	RAL315	TE2		0.1	3.37	0.0296736	RAL315	EPS
0.34	2R-4		3.01	CEU3		0.95	RAL315	TE2		1.08	4.12	0.262136	RAL315	EPS
1.28	2R-4		2.35	CEU3		2.48	RAL315	TE2		0.77	3.52	0.21875	RAL315	EPS
0.92	2R-4		2.59	CEU3		3	RAL315	TE2		4.03	4.52	0.891593	RAL315	EPS
0.61	2R-4		2.22	CEU3		1.86	RAL315	TE2		1.95	4.33	0.450346	RAL315	EPS
1.1	2R-4		2.57	CEU3		0.98	RAL315	TE2		2.06	4.75	0.433684	RAL315	EPS
1.54	2R-4		2.18	CEU3		3.48	RAL315	TE2		0.84	4.75	0.176842	RAL315	EPS
0.59	2R-4		1.85	CEU3		1.85	RAL315	TE2		1.34	4.5	0.297778	RAL315	EPS
0.94	2R-4		2.51	CEU3		2.42	RAL315	TE2		0.15	4.47	0.033557	RAL315	EPS
0.79	2R-4		2.17	CEU3		1.59	RAL315	TE2		0.79	2.71	0.291513	RAL315	EPS
0	2R-4		2.38	CEU3		1.57	RAL315	TE2		1.57	3.68	0.42663	RAL315	EPS
0.59	2R-4		1.61	CEU3		1.45	RAL315	TE2		1.42	3.26	0.435583	RAL315	EPS
0.28	2R-4		1.13	CEU3		2.17	RAL315	TE2		2.77	4.24	0.653302	RAL315	EPS
0.8	2R-4		0.72	CEU3		2.1	RAL315	TE2		2.24	4.39	0.510251	RAL315	EPS
1.62	2R-4		2.05	CEU3		2.78	RAL315	TE2		1.25	3.21	0.389408	RAL315	EPS
1.33	2R-4		1.97	CEU3		1.98	RAL315	TE2		0.49	1.93	0.253886	RAL315	EPS
2.42	2R-4		1.76	CEU3		2.89	RAL315	TE2		2.48	4.15	0.59759	RAL315	EPS
1.27	2R-4		2.13	CEU3		1.66	RAL315	TE2		0.5	5.38	0.0929368	RAL315	EPS
1.41	2R-4		1.81	CEU3		2.7	RAL315	TE2		2.1	6.09	0.344828	RAL315	EPS
0	2R-4		3.05	CEU3		2.55	RAL315	TE2		0.25	5.47	0.0457038	RAL315	EPS
0.77	2R-4		2.2	CEU3		4.15	RAL315	TE2		1.21	4.05	0.298765	RAL315	EPS
0.75	2R-4		3.36	CEU3		3.44	RAL315	TE2		0.56	3.16	0.177215	RAL315	EPS
1.24	2R-4		3.19	CEU3		2.53	RAL315	TE2		1.25	5	0.25	RAL315	EPS
0.42	2R-4		1.94	CEU3		1.59	RAL315	TE2		1	5.08	0.19685	RAL315	EPS
1	2R-4		3.29	CEU3		3.34	RAL315	TE2		0.65	3.62	0.179558	RAL315	EPS
0.79	2R-4		3.79	CEU3		3.37	RAL315	TE2		1.47	4.81	0.305613	RAL315	EPS
0.74	2R-4		2.75	CEU3		1.59	RAL315	TE2		2.34	4.39	0.53303	RAL315	EPS
0	2R-4		3.28	CEU3		3.12	RAL315	TE2		1.44	5.47	0.263254	RAL315	EPS
1.79	2R-4		3.61	CEU3		3.1	RAL315	TE2		1.13	4.49	0.25167	RAL315	EPS
1	2R-4		4.03	CEU3		3.59	RAL315	TE2		2.51	4.46	0.56278	RAL315	EPS
1	2R-4		2.95	CEU3		2.57	RAL315	TE2		1.9	3.88	0.489691	RAL315	EPS
1.22	2R-4		1.81	CEU3		2.34	ORw1118	TE2		2.85	3.79	0.751979	RAL315	EPS
0.84	2R-4		2.07	CEU3		2.49	ORw1118	TE2		3.09	4.28	0.721963	RAL315	EPS
1.03	2R-4		2.42	CEU3		2.11	ORw1118	TE2		0	3.75	0	RAL315	EPS
1.22	2R-4		0.93	CEU3		0.88	ORw1118	TE2		1.67	3.76	0.444149	RAL315	EPS
1.33	2R-4		3.41	CEU3		2.76	ORw1118	TE2		4.93	7.1	0.694366	RAL315	EPS
1.39	2R-4		2.33	CEU3		2.68	ORw1118	TE2		1.84	4.57	0.402626	RAL315	EPS
0.73	2R-4		0.51	CEU3		3.17	ORw1118	TE2		1.27	2.67	0.475655	RAL315	EPS
0.33	2R-4		0.63	CEU3		0	ORw1118	TE2		2.1	3.2	0.65625	RAL315	EPS
0.9	2R-4		2.38	CEU3		0.83	ORw1118	TE2		1.67	4.93	0.338742	RAL315	EPS
0.42	2R-4		1.36	CEU3		3.17	ORw1118	TE2		0.89	4.88	0.182377	RAL315	EPS
1.3	2R-4		2.83	CEU3		4.94	ORw1118	TE2		1.27	3.09	0.411003	RAL315	EPS
1.33	2R-4		2.39	CEU3		3	ORw1118	TE2		1.81	5.23	0.34608	RAL315	EPS
			1.99	CEU3		2.77	ORw1118	TE2		3.07	4.34	0.707373	RAL315	EPS
			2.24	CEU3		3.22	ORw1118	TE2		0.43	5.34	0.0805243	RAL315	EPS
			1.88	CEU3		4.3	ORw1118	TE2		0	5.92	0	RAL315	EPS
			3.95	CEU3		3.39	ORw1118	TE2		3.34	6.44	0.518634	RAL315	EPS
			2.95	CEU3		2.03	ORw1118	TE2		1.57	4.68	0.33547	RAL315	EPS
			0.56	CEU3		3.95	ORw1118	TE2		2.22	3.75	0.592	RAL315	EPS
			3.53	CEU3		3.89	ORw1118	TE2		1.46	4.01	0.36409	RAL315	EPS
			1.88	CEU3		3.07	ORw1118	TE2		1.04	4.32	0.240741	RAL315	EPS
			3.29	CEU3		0.75	ORw1118	TE2		1.61	4.48	0.359375	RAL315	EPS
			4.28	CEU3		3.12	ORw1118	TE2		1.04	4.88	0.213115	RAL315	EPS
			3.54	CEU3		2.05	ORw1118	TE2		0.93	3.63	0.256198	RAL315	EPS
			0.88	CEU3		1.64	ORw1118	TE2		1	4.17	0.239808	RAL315	EPS
			3.43	CEU3		3.55	ORw1118	TE2		1.71	4.44	0.385135	RAL315	EPS
			1.93	CEU3		0	ORw1118	TE2		1.96	3.6	0.544444	RAL315	EPS
			3.47	CEU3		1.65	ORw1118	TE2		0.2	3.07	0.0651466	RAL315	EPS
			3.26	CEU3		1.05	ORw1118	TE2		1.64	4.52	0.362832	RAL315	EPS
			4.44	CEU3		3.33	ORw1118	TE2		2.17	4.55	0.476923	RAL315	EPS
			3.43	CEU3		2.73	ORw1118	TE2		1.21	5.58	0.216846	RAL315	EPS
			2.32	CEU3		3.58	ORw1118	TE2		2.54	5.12	0.496094	RAL315	EPS
			0	CEU3		1.99	ORw1118	TE2		1.21	5.26	0.230038	RAL315	EPS
			2.64	CEU3		2.92	ORw1118	TE2		2.47	5.29	0.466919	RAL315	EPS
			2.96	CEU3		2.57	ORw1118	TE2		1.38	5.03	0.274354	RAL315	EPS
			1.53	CEU3		1.32	ORw1118	TE2		2.02	4.02	0.502488	RAL315	EPS
			2.18	CEU3		1.7	ORw1118	TE2		0	5.19	0	RAL315	EPS
			2.53	CEU3		2.18	ORw1118	TE2		1.54	4.57	0.33698	RAL315	EPS
			2.99	CEU3		1.92	ORw1118	TE2		2.01	5.41	0.371534	RAL315	EPS
			2.42	CEU3		2.68	ORw1118	TE2		1.57	4.05	0.387654	RAL315	EPS
			1.8	CEU3		2.65	ORw1118	TE2		1.46	5.02	0.290837	RAL315	EPS
			1.85	CEU3		2.7	ORw1118	TE2		0.98	5.41	0.181146	RAL315	EPS
			3.69	CEU3		2.27	ORw1118	TE2		0.59	4.17	0.141487	RAL315	EPS
			2.13	CEU3		2.66	ORw1118	TE2		0.63	3.32	0.189759	RAL315	EPS
			1.95	CEU3		1.94	ORw1118	TE2		2.07	4.08	0.507353	RAL315	EPS
			1.93	CEU3		0.47	ORw1118	TE2		0.94	4.11	0.22871	RAL315	EPS
			1.33	CEU3		2.03	ORw1118	TE2		2.19	3.85	0.568831	RAL315	EPS
			2.43	CEU3		1.65	ORw1118	TE2		4.64	5.96	0.778523	RAL315	EPS
			1.89	CEU3		2.1	ORw1118	TE2		1.38	4.58	0.30131	RAL315	EPS
			0.88	CEU3		1.54	ORw1118	TE2		2.08	4.54	0.45815	RAL315	EPS
			1.88	CEU3		3.27	ORw1118	TE2		2.39	4.03	0.593052	RAL315	EPS
			1.81	CEU3		2.8	ORw1118	TE2		0.97	4.85	0.2	RAL315	EPS
			2.3	CEU3		1.74	ORw1118	TE2		0.2	5.87	0.0340716	RAL315	EPS
			2.4	CEU3		2.46	ORw1118	TE2		3.2	3.81	0.839895	RAL315	EPS
			3.86	CEU3		1.79	ORw1118	TE2		2.09	5.44	0.384191	RAL315	EPS
			2.32	CEU3		1.97	ORw1118	TE2		2.05	4.98	0.411647	RAL315	EPS
			0.92	CEU3		1.69	ORw1118	TE2		1.59	3.89	0.40874	RAL315	EPS
			3.73	CEU3		0	ORw1118	TE2		1.97	3.86	0.510363	RAL315	EPS
			2.05	CEU3		2	ORw1118	TE2		2.22	4.17	0.532374	RAL315	EPS
			2.06	CEU3		3.03	ORw1118	TE2		0.56	4.7	0.119149	RAL315	EPS
			2.26	CEU3		2.2	ORw1118	TE2		2	5.46	0.3663	RAL315	EPS
			3.32	CEU3		0	ORw1118	TE2		2.51	5.23	0.479924	RAL315	EPS
			0.28	CEU3		1.5	ORw1118	TE2		2.66	5.07	0.524655	RAL315	EPS
			2.75	CEU3		0	ORw1118	TE2		1.81	6.75	0.268148	RAL315	EPS
			3.62	CEU3		2.06	ORw1118	TE2		1.7	4.48	0.379464	RAL315	EPS
			3.48	CEU3		2.09	ORw1118	TE2		2.83	5.92	0.478041	RAL315	EPS
			2.34	CEU3		0	ORw1118	TE2		0.93	4.85	0.191753	RAL315	EPS
			1.62	CEU3		2.5	ORw1118	TE2		2.71	4.4	0.615909	RAL315	EPS
			2.5	CEU3		1.5	ORw1118	TE2		1.15	5.71	0.201401	RAL315	EPS
			1.41	CEU3		3.03	ORw1118	TE2		0.15	5.47	0.0274223	RAL315	EPS
			3.44	CEU3		1.86	ORw1118	TE2		2.41	4.15	0.580723	RAL315	EPS
			1.18	CEU3		1.39	ORw1118	TE2		1.41	4.28	0.329439	RAL315	EPS
			2.56	CEU3		1.59	ORw1118	TE2		1.3	4.68	0.277778	RAL315	EPS
			1.9	CEU3		1.58	ORw1118	TE2		1.44	8.23	0.17497	RAL315	EPS
			3.47	CEU3		3.21	ORw1118	TE2		0	8.81	0	RAL315	EPS
			2.75	CEU3		1.77	ORw1118	TE2		2.54	6	0.423333	RAL315	EPS
			1.31	CEU3		1.79	ORw1118	TE2		2.54	6.31	0.402536	RAL315	EPS
			2.18	CEU3		1.99	ORw1118	TE2		3.26	5.21	0.62572	RAL315	EPS
			2.47	CEU3		1.97	ORw1118	TE2		0.96	4.93	0.194726	RAL315	EPS
			2.47	CEU3		2.28	ORw1118	TE2		0	3.88	0	RAL315	EPS
			0.59	CEU3		2.75	ORw1118	TE2		0.53	4.09	0.129584	RAL315	EPS
			2.11	CEU3		2.08	ORw1118	TE2		1.4	3.23	0.433437	RAL315	EPS
			2.73	CEU3		2.95	ORw1118	TE2		0.43	3.7	0.116216	RAL315	EPS
			3.08	CEU3		1.33	ORw1118	TE2		1.02	4.58	0.222707	RAL315	EPS
			1.71	CEU3		2.36	ORw1118	TE2		1.39	4.36	0.318807	RAL315	EPS
			0.63	CEU3		2.09	ORw1118	TE2		0.64	4.45	0.14382	RAL315	EPS
			2.24	CEU3		2.51	ORw1118	TE2		2.93	5.7	0.514035	RAL315	EPS
			1.78	CEU3		2.73	ORw1118	TE2		0	4.51	0	RAL315	EPS
			3.43	CEU3		1.79	ORw1118	TE2		1.71	4.91	0.348269	RAL315	EPS
			0.87	CEU3		0.97	ORw1118	TE2		3.71	5.96	0.622483	RAL315	EPS
			0	CEU3		0	ORw1118	TE2		2.15	4.64	0.463362	RAL315	EPS
			3.68	CEU3		1.23	ORw1118	TE2		0.93	6.56	0.141768	RAL315	EPS
			1.24	CEU3		1.19	ORw1118	TE2		2.63	4.86	0.541152	RAL315	EPS
			1.25	CEU3		1.46	ORw1118	TE2		3.76	4.17	0.901679	RAL315	EPS
			2.54	CEU3		2.57	ORw1118	TE2		3	5.2	0.576923	RAL315	EPS
			3.64	CEU3		3.04	ORw1118	TE2		1.71	4.47	0.38255	RAL315	EPS
			0.8	CEU3		1.98	ORw1118	TE2		1.66	4.09	0.405868	RAL315	EPS
			3.68	CEU3		0	ORw1118	TE2		2.17	4.42	0.49095	RAL315	EPS
			2.73	CEU3		2.93	ORw1118	TE2		0.94	5.32	0.176692	RAL315	EPS
			3.11	CEU3		0	ORw1118	TE2		2.28	3.63	0.628099	RAL315	EPS
			1.95	CEU3		0	ORw1118	TE2		1.64	5.61	0.292335	RAL315	EPS
			0.59	CEU3		0	ORw1118	TE2		2.94	6	0.49	RAL315	EPS
			1.3	EU1		1.78	ORw1118	TE2		1.79	5.53	0.323689	RAL315	EPS
			1.23	EU1		1.47	ORw1118	TE2		3	5.88	0.510204	RAL315	EPS
			0	EU1		2.4	ORw1118	TE2		1.76	3.84	0.458333	RAL315	EPS
			1.26	EU1		2.13	ORw1118	TE2		2.4	6.47	0.370943	RAL315	EPS
			1.7	EU1		0	ORw1118	TE2		2.8	4.18	0.669856	RAL315	EPS
			0	EU1		2.82	ORw1118	TE2		1.06	4.52	0.234513	RAL315	EPS
			3.64	EU1		1.19	ORw1118	TE2		1.62	5.65	0.286726	RAL315	EPS
			1.86	EU1		2.09	ORw1118	TE2		3.09	6.17	0.50081	RAL315	EPS
			0	EU1		3.35	RAL315	TE2		1.79	2.58	0.693798	RAL315	EPS
			2.99	EU1		1.7	RAL315	TE2		2.83	4.14	0.683575	RAL315	EPS
			2.05	EU1		1.81	RAL315	TE2		1.39	4.87	0.285421	RAL315	EPS
			0	EU1		0	RAL315	TE2		0.7	5.19	0.134875	RAL315	EPS
			1.32	EU1		1.93	RAL315	TE2		1.31	3.4	0.385294	RAL315	EPS
			1.42	EU1		3.97	RAL315	TE2		2.37	6.23	0.380417	RAL315	EPS
			0.26	EU1		2.63	RAL315	TE2		1.06	4.2	0.252381	RAL315	EPS
			2.04	EU1		2.53	RAL315	TE2		1.48	4.15	0.356627	RAL315	EPS
			1.97	EU1		1.78	RAL315	TE2		2.48	4.15	0.59759	RAL315	EPS
			2.21	EU1		2.55	RAL315	TE2		1.84	4.33	0.424942	RAL315	EPS
			2.47	EU1		2.39	RAL315	TE2		2.51	4.88	0.514344	RAL315	EPS
			0	EU1		0	RAL315	TE2		0.1	4.93	0.020284	RAL315	EPS
			0.81	EU1		2.26	RAL315	TE2		2.1	3.91	0.537084	RAL315	EPS
			0	EU1		2.02	RAL315	TE2		0.9	2.92	0.308219	RAL315	EPS
			2.4	EU1		2.24	RAL315	TE2		2.76	4.48	0.616071	RAL315	EPS
			0	EU1		1.39	RAL315	TE2		1.93	4.57	0.422319	RAL315	EPS
			2.11	EU1		2.9	RAL315	TE2		0.9	3.89	0.231362	RAL315	EPS
			1.6	EU1		1.38	RAL315	TE2		2.63	3.82	0.688482	RAL315	EPS
			1.36	EU1		2.43	RAL315	TE2		2.12	3.18	0.666667	RAL315	EPS
			0	EU1		0	RAL315	TE2		0.39	4.37	0.0892449	RAL315	EPS
			1	EU1		1.12	RAL315	TE2		1.62	4.83	0.335404	RAL315	EPS
			0	EU1		1.5	RAL315	TE2		1.8	3.39	0.530973	RAL315	EPS
			1.43	EU1		2.85	RAL315	TE2		0	5.47	0	ORw1118	HD4
			0	EU1		1.46	RAL315	TE2		1.52	4.33	0.351039	ORw1118	HD4
			1.83	EU1		3.06	RAL315	TE2		1.81	4.16	0.435096	ORw1118	HD4
			1.85	EU1		2.24	RAL315	TE2		1.21	4.29	0.282051	ORw1118	HD4
			2.67	EU1		2.57	RAL315	TE2		1.57	4.37	0.359268	ORw1118	HD4
			0	EU1		2.07	RAL315	TE2		1.13	4.38	0.257991	ORw1118	HD4
			3.85	EU1		2.9	RAL315	CTE1		2.21	4.11	0.537713	ORw1118	HD4
			0.62	EU1		1.63	RAL315	CTE1		0.81	4.84	0.167355	ORw1118	HD4
			2.7	EU1		3.8	RAL315	CTE1		1.04	4.33	0.240185	ORw1118	HD4
			3.02	EU1		3	RAL315	CTE1		2.22	4.71	0.471338	ORw1118	HD4
			0	EU1		0.88	RAL315	CTE1		1.89	4.97	0.380282	ORw1118	HD4
			1.45	EU1		3.07	RAL315	CTE1		1.49	3.47	0.429395	ORw1118	HD4
			1.5	EU1		2.02	RAL315	CTE1		2.08	5.09	0.408644	ORw1118	HD4
			2.09	EU1		1.31	RAL315	CTE1		2.42	4.1	0.590244	ORw1118	HD4
			2.09	EU1		3.75	RAL315	CTE1		3.12	4.58	0.681223	ORw1118	HD4
			0	EU1		2.8	RAL315	CTE1		1.87	5.19	0.360308	ORw1118	HD4
			0.53	EU1		3.71	RAL315	CTE1		1.91	4.14	0.461353	ORw1118	HD4
			0.5	EU1		0.75	RAL315	CTE1		1.5	3.49	0.429799	ORw1118	HD4
			4.39	EU1		3.46	RAL315	CTE1		1.18	4.5	0.262222	ORw1118	HD4
			1.41	EU1		2.51	RAL315	CTE1		2	3.3	0.606061	ORw1118	HD4
			1.58	EU1		3.34	RAL315	CTE1		1.45	4.59	0.315904	ORw1118	HD4
			0.88	EU1		4.55	RAL315	CTE1		1.25	4.5	0.277778	ORw1118	HD4
			2.06	EU1		3.71	RAL315	CTE1		2.22	3.87	0.573643	ORw1118	HD4
			2.57	EU1		1.17	RAL315	CTE1		2.39	3.24	0.737654	ORw1118	HD4
			2.47	EU1		2.2	RAL315	CTE1		2.72	3.87	0.702842	ORw1118	HD4
			1.93	EU1		2.14	RAL315	CTE1		0.33	3.73	0.0884718	ORw1118	HD4
			2.18	EU1		3.2	RAL315	CTE1		1.47	4	0.3675	ORw1118	HD4
			0.8	EU1		2.67	RAL315	CTE1		0.96	4.19	0.229117	ORw1118	HD4
			2.5	EU1		3.36	RAL315	CTE1		2.88	6.17	0.466775	ORw1118	HD4
			1.55	EU1		3.89	RAL315	CTE1		1.35	5.06	0.266798	ORw1118	HD4
			0.71	EU1		2.67	RAL315	CTE1		1.21	3.61	0.33518	ORw1118	HD4
			2.46	EU1		3.3	RAL315	CTE1		2.3	4.6	0.5	ORw1118	HD4
			1.78	EU1		2.55	RAL315	CTE1		0.83	3.89	0.213368	ORw1118	HD4
			1.14	EU1		4.29	RAL315	CTE1		0.75	4.07	0.184275	ORw1118	HD4
			2.2	EU1		2.42	RAL315	CTE1		1.44	3.55	0.405634	ORw1118	HD4
			0.92	EU1		2.82	RAL315	CTE1		0.84	3.92	0.214286	ORw1118	HD4
			4.13	EU1		2.86	RAL315	CTE1		2.2	3.82	0.575916	ORw1118	HD4
			2.68	EU1		1.9	RAL315	CTE1		1.25	3.22	0.388199	ORw1118	HD4
			0	EU1		3.6	RAL315	CTE1		1.25	4.05	0.308642	ORw1118	HD4
			2.63	EU1		3.72	RAL315	CTE1		1.35	3.6	0.375	ORw1118	HD4
			3.16	EU1		1.9	RAL315	CTE1		0	4.47	0	ORw1118	HD4
			1.62	EU1		4.05	RAL315	CTE1		2.94	4.48	0.65625	ORw1118	HD4
			1.74	EU1		2.76	RAL315	CTE1		2.58	4.51	0.572062	ORw1118	HD4
			2.62	EU1		3.29	RAL315	CTE1		2.3	6.43	0.357698	ORw1118	HD4
			1.68	EU1		4.31	RAL315	CTE1		3.58	5.52	0.648551	ORw1118	HD4
			1.71	EU1		0.71	RAL315	CTE1		1.44	3.62	0.39779	ORw1118	HD4
			1.14	EU1		2.45	RAL315	CTE1		1.23	3.98	0.309045	ORw1118	HD4
			1.69	EU1		2.81	RAL315	CTE1		0.93	3.81	0.244094	ORw1118	HD4
			2.47	EU1		3.99	RAL315	CTE1		0.84	3.07	0.273616	ORw1118	HD4
			1.35	EU1		1.78	RAL315	CTE1		1.02	2.66	0.383459	ORw1118	HD4
			0	EU1		2.84	RAL315	CTE1		1.27	5.09	0.249509	ORw1118	HD4
			1.26	EU1		1.1	RAL315	CTE1		1.45	3.84	0.377604	ORw1118	HD4
			1.78	EU1		2.34	RAL315	CTE1		2.08	4.9	0.42449	ORw1118	HD4
			2.81	EU1		2.53	RAL315	CTE1		2.4	5.95	0.403361	ORw1118	HD4
			1.67	EU1		0.92	RAL315	CTE1		0.89	3.83	0.232376	ORw1118	HD4
			2.8	EU1		5.49	RAL315	CTE1		0.84	3.02	0.278146	ORw1118	HD4
			1.9	EU1		2.71	RAL315	CTE1		1.21	2.73	0.443223	ORw1118	HD4
			2.65	EU1		5.04	RAL315	CTE1		1.68	4.08	0.411765	ORw1118	HD4
			1.62	EU1		3.03	RAL315	CTE1		0.52	4.78	0.108787	ORw1118	HD4
			1.83	EU1		1.24	RAL315	CTE1		2.17	4.3	0.504651	ORw1118	HD4
			1.52	EU1		4.19	RAL315	CTE1		0.96	2.95	0.325424	ORw1118	HD4
			2.05	EU1		3.09	RAL315	CTE1		2.8	4.13	0.677966	ORw1118	HD4
			3.51	EU1		2.96	RAL315	CTE1		1.3	4.3	0.302326	ORw1118	HD4
			1.12	EU1		3.96	RAL315	CTE1		3	5.24	0.572519	ORw1118	HD4
			2.39	EU1		1.22	RAL315	CTE1		1.62	4.23	0.382979	ORw1118	HD4
			1.46	EU1		3.54	RAL315	CTE1		2.3	5.43	0.423573	ORw1118	HD4
			2.06	EU1		1.06	RAL315	CTE1		1.81	4.61	0.392625	ORw1118	HD4
			1.93	EU1		1.7	RAL315	CTE1		1.48	3.6	0.411111	ORw1118	HD4
			1.06	EU1		3.84	RAL315	CTE1		1.32	4.36	0.302752	ORw1118	HD4
			1.62	EU1		3.26	RAL315	CTE1		1.35	3.43	0.393586	ORw1118	HD4
			1.7	EU1		1.98	RAL315	CTE1		3.03	5.43	0.558011	ORw1118	HD4
			2.81	EU1		3.8	RAL315	CTE1		2.49	4.01	0.620948	ORw1118	HD4
			1.34	EU1		3.69	RAL315	CTE1		2.68	5.15	0.520388	ORw1118	HD4
			2.14	EU1		4.28	RAL315	CTE1		1.04	5.66	0.183746	ORw1118	HD4
			1.96	EU1		3.24	RAL315	CTE1		3.67	4.32	0.849537	ORw1118	HD4
			1.39	EU1		1.74	RAL315	CTE1		0	6.19	0	ORw1118	HD4
			0.79	EU1		2.07	RAL315	CTE1		2.97	4.9	0.606122	ORw1118	HD4
			0.9	EU1		3.87	RAL315	CTE1		1.61	4.56	0.35307	ORw1118	HD4
			2.36	EU1		3.86	RAL315	CTE1		0.98	3.35	0.292537	ORw1118	HD4
			1.73	EU1		3.7	RAL315	CTE1		1.14	4.68	0.24359	ORw1118	HD4
			1.58	EU1		4.1	RAL315	CTE1		1.96	4.77	0.410901	ORw1118	HD4
			0	EU1		1.92	RAL315	CTE1		2.19	4.7	0.465957	ORw1118	HD4
			0	EU1		1.82	RAL315	CTE1		2.3	3.44	0.668605	ORw1118	HD4
			1.67	EU1		1.72	RAL315	CTE1		3.19	3.69	0.864499	ORw1118	HD4
			1.06	EU1		3.11	ORw1118	CTE1		1.38	4.47	0.308725	ORw1118	HD4
			0.18	EU1		2.07	ORw1118	CTE1		2	3.76	0.531915	ORw1118	HD4
			1.06	EU1		0	ORw1118	CTE1		3.07	5.7	0.538596	ORw1118	HD4
			0	EU1		3.33	ORw1118	CTE1		0.5	4.22	0.118483	ORw1118	HD4
			0.83	EU1		2.74	ORw1118	CTE1		3.85	8.02	0.48005	ORw1118	HD4
			1.41	EU1		3.87	ORw1118	CTE1		1.98	4.58	0.432314	ORw1118	HD4
			0.92	EU1		3.43	ORw1118	CTE1		0.83	5.08	0.163386	ORw1118	HD4
			1.54	EU1		3.03	ORw1118	CTE1		1.56	4.78	0.32636	ORw1118	HD4
			1.07	EU1		2.95	ORw1118	CTE1		2.43	4.17	0.582734	ORw1118	HD4
			0	EU1		2.4	ORw1118	CTE1		1.45	4.23	0.34279	ORw1118	HD4
			0	EU1		2	ORw1118	CTE1		2.4	4.46	0.538117	ORw1118	HD4
			3.43	EU1		3.24	ORw1118	CTE1		2.9	4.38	0.6621	ORw1118	HD4
			0.62	EU1		3.64	ORw1118	CTE1		2.1	4.8	0.4375	ORw1118	HD4
			1.49	EU1		2.93	ORw1118	CTE1		1.53	5.32	0.287594	ORw1118	HD4
			1.59	EU1		2.39	ORw1118	CTE1		0.93	5	0.186	ORw1118	HD4
			1.63	EU1		3.35	ORw1118	CTE1		2.29	3.95	0.579747	ORw1118	HD4
			1.14	EU1		3.42	ORw1118	CTE1		0.1	4.64	0.0215517	ORw1118	HD4
			0	EU1		3.47	ORw1118	CTE1		2.37	3.68	0.644022	ORw1118	HD4
			1.23	EU1		3.14	ORw1118	CTE1		1.69	4.58	0.368996	ORw1118	HD4
			1.46	EU1		1.69	ORw1118	CTE1		1.18	5.54	0.212996	ORw1118	HD4
			1.85	EU1		3.18	ORw1118	CTE1		2.4	3.53	0.679887	ORw1118	HD4
			1.06	EU1		3.03	ORw1118	CTE1		2.32	5.03	0.461233	ORw1118	HD4
			2.46	EU1		2.36	ORw1118	CTE1		3.43	5.57	0.615799	ORw1118	HD4
			5.35	EU1		2.99	ORw1118	CTE1		3.72	5.26	0.707224	ORw1118	HD4
			1.71	EU1		3.87	ORw1118	CTE1		1.66	4.51	0.368071	ORw1118	HD4
			1.43	EU1		2.27	ORw1118	CTE1		2.36	3.93	0.600509	ORw1118	HD4
			1.61	EU1		2.29	ORw1118	CTE1		2.41	3.39	0.710914	ORw1118	HD4
			1.39	EU1		3.01	ORw1118	CTE1		1.28	3.67	0.348774	ORw1118	HD4
			1.62	EU1		1.78	ORw1118	CTE1		0.84	4.47	0.187919	ORw1118	HD4
			1.62	EU1		1.14	ORw1118	CTE1		0.6	4.04	0.148515	ORw1118	HD4
			1.9	EU1		2.73	ORw1118	CTE1		0	2.57	0	ORw1118	HD4
			1.5	EU1		2.03	ORw1118	CTE1		1.43	3.9	0.366667	ORw1118	HD4
			0.59	EU1		0.63	ORw1118	CTE1		1.26	3.55	0.35493	ORw1118	HD4
			1.33	EU1		1.39	ORw1118	CTE1		1.56	3.86	0.404145	ORw1118	HD4
			0.37	EU1		2.98	ORw1118	CTE1		1.38	3.68	0.375	ORw1118	HD4
			1.43	EU1		1.58	ORw1118	CTE1		1.11	5.19	0.213873	ORw1118	HD4
			0	EU2		1.55	ORw1118	CTE1		1.7	2.6	0.653846	ORw1118	HD4
			0.88	EU2		3.03	ORw1118	CTE1		2.7	3.5	0.771429	ORw1118	HD4
			2.31	EU2		1.9	ORw1118	CTE1		1.73	3.22	0.537267	ORw1118	HD4
			1.57	EU2		2.55	ORw1118	CTE1		1.81	4.04	0.44802	ORw1118	HD4
			1.77	EU2		3.05	ORw1118	CTE1		1.5	3.97	0.377834	ORw1118	HD4
			1.85	EU2		3.36	ORw1118	CTE1		0.96	4.26	0.225352	ORw1118	HD4
			0.59	EU2		2.27	ORw1118	CTE1		1.61	4.2	0.383333	ORw1118	HD4
			1.81	EU2		1.88	ORw1118	CTE1		1.81	4.38	0.413242	ORw1118	HD4
			1.56	EU2		3.59	ORw1118	CTE1		2.49	4.32	0.576389	ORw1118	HD4
			2.24	EU2		4.67	ORw1118	CTE1		1.75	3.66	0.478142	ORw1118	HD4
			2.46	EU2		2.6	ORw1118	CTE1		1.12	3.1	0.36129	ORw1118	HD4
			2.39	EU2		3.05	ORw1118	CTE1		2.13	4.2	0.507143	ORw1118	HD4
			2.56	EU2		3.01	ORw1118	CTE1		3	4.7	0.638298	ORw1118	HD4
			1.32	EU2		3.73	ORw1118	CTE1		1.77	3.86	0.458549	ORw1118	HD4
			2.62	EU2		1.85	ORw1118	CTE1		0.66	3.1	0.212903	ORw1118	HD4
			2.81	EU2		5.26	ORw1118	CTE1		1.87	4.82	0.387967	ORw1118	HD4
			0.35	EU2		2.71	ORw1118	CTE1		0.81	3.74	0.216578	ORw1118	HD4
			0.71	EU2		2.43	ORw1118	CTE1		0.94	6.22	0.151125	ORw1118	HD4
			3.79	EU2		2.37	ORw1118	CTE1		0.1	5	0.02	ORw1118	HD4
			0.81	EU2		3.93	ORw1118	CTE1		2.08	5.63	0.369449	ORw1118	HD4
			2.11	EU2		2.27	ORw1118	CTE1		2.05	4.04	0.507426	ORw1118	HD4
			1.28	EU2		2.45	ORw1118	CTE1		0.7	4.6	0.152174	ORw1118	HD4
			2.24	EU2		1.74	ORw1118	CTE1		1.04	4.4	0.236364	ORw1118	HD4
			0.98	EU2		2.28	ORw1118	CTE1		3.24	5.56	0.582734	ORw1118	HD4
			2.66	EU2		3.17	ORw1118	CTE1		0.1	5.66	0.0176678	ORw1118	HD4
			2.87	EU2		3.16	ORw1118	CTE1		0.1	3.95	0.0253165	ORw1118	HD4
			2.75	EU2		0.44	ORw1118	CTE1		1.35	4.44	0.304054	ORw1118	HD4
			0.26	EU2		3.87	ORw1118	CTE1		1.76	4.32	0.407407	ORw1118	HD4
			1.49	EU2		0.83	ORw1118	CTE1		2.05	5.29	0.387524	ORw1118	HD4
			1.95	EU2		2.67	ORw1118	CTE1		1.35	4.37	0.308924	ORw1118	HD4
			1.93	EU2		2.22	ORw1118	CTE1		1.25	4.6	0.271739	ORw1118	HD4
			1.18	EU2		4.44	ORw1118	CTE1		1.54	4.41	0.349206	ORw1118	HD4
			1.25	EU2		3.54	ORw1118	CTE1		1.25	3.39	0.368732	ORw1118	HD4
			2.52	EU2		1.71	ORw1118	CTE1		0.61	3.84	0.158854	ORw1118	HD4
			0.9	EU2		2.14	ORw1118	CTE1		2.3	5	0.46	ORw1118	HD4
			2.14	EU2		1.7	ORw1118	CTE1		1.61	3.74	0.430481	ORw1118	HD4
			2.66	EU2		3.62	ORw1118	CTE1		1.57	2.89	0.543253	ORw1118	HD4
			0.88	EU2		1.45	RAL315	CTE2		1.32	3.2	0.4125	ORw1118	HD4
			2.25	EU2		2.43	RAL315	CTE2		1.35	5.52	0.244565	ORw1118	HD4
			2.93	EU2		4.92	RAL315	CTE2		1.18	4.71	0.250531	ORw1118	HD4
			1.67	EU2		1.62	RAL315	CTE2		1.68	4.05	0.414815	ORw1118	HD4
			0.2	EU2		1.5	RAL315	CTE2		2.3	3.86	0.595855	ORw1118	HD4
			3.17	EU2		3.27	RAL315	CTE2		1.74	6.68	0.260479	ORw1118	HD4
			1.78	EU2		1.67	RAL315	CTE2		1.3	6.73	0.193165	ORw1118	HD4
			3.72	EU2		4.68	RAL315	CTE2		2.32	5.41	0.428835	ORw1118	HD4
			1	EU2		2.59	RAL315	CTE2		1.35	4.2	0.321429	ORw1118	HD4
			3.3	EU2		1.24	RAL315	CTE2		1.27	3.93	0.323155	ORw1118	HD4
			2.39	EU2		1.62	RAL315	CTE2		1.18	2.58	0.457364	ORw1118	HD4
			3.61	EU2		1.73	RAL315	CTE2		1.64	4.32	0.37963	ORw1118	HD4
			0.83	EU2		3.5	RAL315	CTE2		1.74	4.27	0.407494	ORw1118	HD4
			3.88	EU2		2.34	RAL315	CTE2		1.28	3.9	0.328205	ORw1118	HD4
			2.42	EU2		4.27	RAL315	CTE2		2.72	3.76	0.723404	ORw1118	HD4
			1.86	EU2		2.04	RAL315	CTE2		1.16	3.5	0.331429	ORw1118	HD4
			3.07	EU2		3.5	RAL315	CTE2		3.05	4.28	0.712617	ORw1118	HD4
			1.69	EU2		3.7	RAL315	CTE2		3.4	4.41	0.770975	ORw1118	HD4
			1.14	EU2		2.27	RAL315	CTE2		2.65	3.67	0.722071	ORw1118	HD4
			0.51	EU2		2.45	RAL315	CTE2		1.88	4.55	0.413187	ORw1118	HD4
			2.83	EU2		2.66	RAL315	CTE2		1.34	3.96	0.338384	ORw1118	HD4
			2.57	EU2		0	RAL315	CTE2		2.15	2.49	0.863454	ORw1118	HD4
			2.03	EU2		1.37	RAL315	CTE2		1.18	3.6	0.327778	ORw1118	HD4
			3.07	EU2		3.12	RAL315	CTE2		2.39	2.77	0.862816	ORw1118	HD4
			2.55	EU2		1.85	RAL315	CTE2		1.28	3.05	0.419672	ORw1118	HD4
			0.97	EU2		1.77	RAL315	CTE2		2.48	3.81	0.650919	ORw1118	HD4
			0.69	EU2		2.63	RAL315	CTE2		0.62	4.55	0.136264	ORw1118	HD4
			0	EU2		3.48	RAL315	CTE2		1.61	4.42	0.364253	ORw1118	HD4
			1.55	EU2		2.65	RAL315	CTE2		2.24	4.58	0.489083	ORw1118	HD4
			1.06	EU2		2.54	RAL315	CTE2		0.96	4.15	0.231325	ORw1118	HD4
			0.26	EU2		0.8	RAL315	CTE2		2.49	4.47	0.557047	ORw1118	HD4
			2.24	EU2		1.41	RAL315	CTE2		1.71	4.09	0.418093	ORw1118	HD4
			0.87	EU2		0.42	RAL315	CTE2		1.15	3.93	0.292621	ORw1118	HD4
			2.14	EU2		3.51	RAL315	CTE2		1.11	3.81	0.291339	ORw1118	HD4
			0.8	EU2		2.64	RAL315	CTE2		1.18	3.81	0.309711	ORw1118	HD4
			1.1	EU2		0.73	RAL315	CTE2		1.67	4.21	0.396675	ORw1118	HD4
			1.72	EU2		2.77	RAL315	CTE2		1.96	3.39	0.578171	ORw1118	HD4
			1.27	EU2		2.69	RAL315	CTE2		2.54	4.09	0.621027	ORw1118	HD4
			1.19	EU2		3.01	RAL315	CTE2		2.27	4.22	0.537915	ORw1118	HD4
			1.14	EU2		2.56	RAL315	CTE2		1.39	3.05	0.455738	ORw1118	HD4
			2.75	EU2		0.59	RAL315	CTE2		0.96	4.33	0.221709	ORw1118	HD4
			0.7	EU2		2.47	RAL315	CTE2		0	4.5	0	ORw1118	HD4
			2.69	EU2		1.79	RAL315	CTE2		3.45	5.19	0.66474	ORw1118	HD4
			2.48	EU2		3.32	RAL315	CTE2		0.96	4.13	0.232446	ORw1118	HD4
			1.47	EU2		1.67	RAL315	CTE2		0	4.52	0	ORw1118	HD4
			1.61	EU2		1.37	RAL315	CTE2		1.43	3.68	0.388587	ORw1118	HD4
			2.9	EU2		3.82	RAL315	CTE2		1.84	3.6	0.511111	ORw1118	HD4
			1.81	EU2		3.53	RAL315	CTE2		1.62	3.6	0.45	ORw1118	HD4
			1.96	EU2		5.42	RAL315	CTE2		1.89	3.5	0.54	ORw1118	HD4
			2	EU2		4.12	RAL315	CTE2		1.68	3.36	0.5	ORw1118	HD4
			1.22	EU2		2.32	RAL315	CTE2		2.17	3.47	0.62536	ORw1118	HD4
			2.39	EU2		2.69	RAL315	CTE2		1.71	3.59	0.476323	ORw1118	HD4
			1.65	EU2		4.22	RAL315	CTE2		1.86	3.35	0.555224	ORw1118	HD4
			2.7	EU2		0.71	RAL315	CTE2		0.71	3.16	0.224684	ORw1118	HD4
			2.07	EU2		2.93	RAL315	CTE2		1.47	4.45	0.330337	ORw1118	HD4
			0	EU2		3.54	RAL315	CTE2		1.56	4.66	0.334764	ORw1118	HD4
			1.97	EU2		2.73	RAL315	CTE2		2	5.25	0.380952	ORw1118	HD4
			0.33	EU2		2.16	RAL315	CTE2		1.74	5.11	0.340509	ORw1118	HD4
			0.81	EU2		2.71	RAL315	CTE2		1.16	4.05	0.28642	ORw1118	HD4
			1.71	EU2		2.12	RAL315	CTE2		1.27	5.67	0.223986	ORw1118	HD4
			1.58	EU2		3.82	RAL315	CTE2		1.21	3.84	0.315104	ORw1118	HD4
			2.52	EU2		2.13	RAL315	CTE2		1.68	4.09	0.410758	ORw1118	HD4
			1.51	EU2		1	RAL315	CTE2		1.25	4.65	0.268817	ORw1118	HD4
			1.54	EU2		2.31	RAL315	CTE2		1.09	4.32	0.252315	ORw1118	HD4
			2.65	EU2		3.93	RAL315	CTE2		1.82	2.78	0.654676	ORw1118	HD4
			0.81	EU2		3.18	RAL315	CTE2		2.16	4.8	0.45	ORw1118	HD4
			1.5	EU2		1.69	RAL315	CTE2		1.52	3.43	0.443149	ORw1118	HD4
			1.85	EU2		2.47	RAL315	CTE2		0.72	3.55	0.202817	ORw1118	HD4
			1.75	EU2		3.64	RAL315	CTE2		0.1	4.28	0.0233645	ORw1118	HD4
			1.74	EU2		2.33	RAL315	CTE2		1.59	4.82	0.329876	ORw1118	HD4
			2.45	EU2		3.61	RAL315	CTE2		0.52	4.82	0.107884	ORw1118	HD4
			0.75	EU2		3.96	RAL315	CTE2		1.66	6.5	0.255385	ORw1118	HD4
			1.76	EU2		2.44	RAL315	CTE2		2.39	5.5	0.434545	ORw1118	HD4
			2.68	EU2		2.87	RAL315	CTE2		0.53	4.32	0.122685	ORw1118	HD4
			2.37	EU2		2.79	RAL315	CTE2		1.35	4.8	0.28125	ORw1118	HD4
			3.5	EU2		2.89	RAL315	CTE2		0.13	4.88	0.0266393	ORw1118	HD4
			1	EU2		0.75	RAL315	CTE2		1.23	7.2	0.170833	ORw1118	HD4
			1.96	EU2		1.65	RAL315	CTE2		0.98	3.77	0.259947	ORw1118	HD4
			2.47	EU2		2.99	RAL315	CTE2		1.43	3.39	0.421829	ORw1118	HD4
			2.76	EU2		4.1	RAL315	CTE2		1.87	3.53	0.529745	ORw1118	HD4
			0.44	EU2		3.21	RAL315	CTE2		1.81	2.72	0.665441	ORw1118	HD4
			3.18	EU2		3.81	RAL315	CTE2		2.53	3.64	0.695055	ORw1118	HD4
			2.68	EU2		2.65	RAL315	CTE2		1.87	3.74	0.5	ORw1118	HD4
			2.73	EU2		3.78	ORw1118	CTE2		1.54	3.78	0.407407	ORw1118	HD4
			1.3	EU2		3.77	ORw1118	CTE2		0.62	3.09	0.200647	ORw1118	HD4
			0	EU2		2.59	ORw1118	CTE2		1.02	2.88	0.354167	ORw1118	HD4
			2.46	EU2		0.6	ORw1118	CTE2		1.78	3.12	0.570513	ORw1118	HD4
			2.79	EU2		1.63	ORw1118	CTE2		1.14	2.95	0.386441	ORw1118	HD4
			0.81	EU2		3.85	ORw1118	CTE2		1.23	4.38	0.280822	ORw1118	HD4
			2.28	EU2		3.63	ORw1118	CTE2		0.89	3.95	0.225316	ORw1118	HD4
			2.32	EU2		1.98	ORw1118	CTE2		0.98	4.67	0.20985	ORw1118	HD4
			2.45	EU2		2.92	ORw1118	CTE2		1.37	4.02	0.340796	ORw1118	HD4
			1.85	EU2		2.8	ORw1118	CTE2		1.67	3.81	0.43832	ORw1118	HD4
			1.6	EU2		3.44	ORw1118	CTE2		2.89	5.14	0.562257	ORw1118	HD4
			0.35	EU2		2.7	ORw1118	CTE2		0.89	3.19	0.278997	ORw1118	HD4
			0.88	EU2		1.55	ORw1118	CTE2		3.43	3.68	0.932065	ORw1118	HD4
			1.63	EU2		2.29	ORw1118	CTE2		0.69	3	0.23	ORw1118	HD4
			2.31	EU2		3.55	ORw1118	CTE2		0.91	4.12	0.220874	ORw1118	HD4
			1.81	EU2		4.15	ORw1118	CTE2		2.39	4	0.5975	ORw1118	HD4
			2.61	EU2		3.62	ORw1118	CTE2		0.74	3.5	0.211429	ORw1118	HD4
			1.73	EU2		1.39	ORw1118	CTE2		1.21	3.811	0.317502	ORw1118	HD4
			1.74	EU2		2.6	ORw1118	CTE2		1	3.75	0.266667	ORw1118	HD4
			1.37	EU2		4.67	ORw1118	CTE2		1.07	4.29	0.249417	ORw1118	HD4
			0	EU2		1.27	ORw1118	CTE2		2.42	3.96	0.611111	ORw1118	HD4
			0.66	EU2		2.5	ORw1118	CTE2		0.44	3.67	0.119891	ORw1118	HD4
			1.76	EU2		2.92	ORw1118	CTE2		1.09	3.35	0.325373	ORw1118	HD4
			2.02	EU2		3.17	ORw1118	CTE2		3	6.56	0.457317	ORw1118	HD4
			2.12	EU2		1.15	ORw1118	CTE2		0.52	5.89	0.0882852	ORw1118	HD4
			1.27	EU2		1.58	ORw1118	CTE2		1.16	4.32	0.268519	RAL315	HD4
			1.5	EU2		3.32	ORw1118	CTE2		2.82	4.43	0.636569	RAL315	HD4
			1.77	EU2		2.39	ORw1118	CTE2		0.52	3.62	0.143646	RAL315	HD4
			1.16	EU2		2.84	ORw1118	CTE2		2.28	4.6	0.495652	RAL315	HD4
			3.23	EU2		3.46	ORw1118	CTE2		1.4	4.7	0.297872	RAL315	HD4
			3	EU2		0	ORw1118	CTE2		2.02	4.15	0.486747	RAL315	HD4
			3.23	EU2		2.18	ORw1118	CTE2		1.12	5.05	0.221782	RAL315	HD4
			3.17	EU2		3.64	ORw1118	CTE2		2.63	5.8	0.453448	RAL315	HD4
			1.81	EU2		3.41	ORw1118	CTE2		1.98	3.85	0.514286	RAL315	HD4
			3.54	EU2		2.81	ORw1118	CTE2		0	3.6	0	RAL315	HD4
			2.07	EU2		2.2	ORw1118	CTE2		1.04	3.33	0.312312	RAL315	HD4
			0	EU2		1.06	ORw1118	CTE2		1.21	5	0.242	RAL315	HD4
			0.97	EU2		1.8	ORw1118	CTE2		1.49	4.48	0.332589	RAL315	HD4
			2.3	EU2		4.07	ORw1118	CTE2		1.62	4.55	0.356044	RAL315	HD4
			2.32	EU2		1.12	ORw1118	CTE2		0.84	3.79	0.221636	RAL315	HD4
			1.55	EU2		2.09	ORw1118	CTE2		1.71	6.47	0.264297	RAL315	HD4
			2.69	EU2		2.45	ORw1118	CTE2		0.96	5.45	0.176147	RAL315	HD4
			0	EU2		1.25	ORw1118	CTE2		1.98	3.39	0.584071	RAL315	HD4
			2	EU2		3.45	ORw1118	CTE2		1.56	5.4	0.288889	RAL315	HD4
			4.14	EU2		2.79	ORw1118	CTE2		1.93	5.72	0.337413	RAL315	HD4
			2.95	EU2		5.29	ORw1118	CTE2		1.4	4.7	0.297872	RAL315	HD4
			1.76	EU2		2.3	ORw1118	CTE2		1.94	4.33	0.448037	RAL315	HD4
			2.53	EU2		1.73	ORw1118	CTE2		1.74	4.5	0.386667	RAL315	HD4
			2.78	EU2		2.44	ORw1118	CTE2		3.26	5.52	0.59058	RAL315	HD4
			1.5	EU2		3.32	ORw1118	CTE2		2.1	4.11	0.510949	RAL315	HD4
			3.01	EU2		2.46	ORw1118	CTE2		1.47	4.11	0.357664	RAL315	HD4
			0	EU2		1.3	ORw1118	CTE2		1.62	4.18	0.38756	RAL315	HD4
			2.61	EU2		1.86	ORw1118	CTE2		1.56	3.38	0.461538	RAL315	HD4
			2.2	EU2		2.73	ORw1118	CTE2		1.81	4.09	0.442543	RAL315	HD4
			1.58	EU2		1.78	ORw1118	CTE2		0.29	3.67	0.0790191	RAL315	HD4
			3.42	EU2		2.1	ORw1118	CTE2		0.42	3.23	0.130031	RAL315	HD4
			0	EU3		3.2	ORw1118	CTE2		2.65	3.85	0.688312	RAL315	HD4
			1.32	EU3		1.81	ORw1118	CTE2		0.43	4.4	0.0977273	RAL315	HD4
			2.21	EU3		0.26	ORw1118	CTE2		1.91	4.48	0.426339	RAL315	HD4
			3.17	EU3		1.89	ORw1118	CTE2		2.42	4.68	0.517094	RAL315	HD4
			2.39	EU3		3.88	ORw1118	CTE2		0	4.26	0	RAL315	HD4
			0.53	EU3		3.75	ORw1118	CTE2		0	3.62	0	RAL315	HD4
			1.42	EU3		2.32	ORw1118	CTE2		1.04	4.12	0.252427	RAL315	HD4
			2.98	EU3		3.03	ORw1118	CTE2		0.59	5.11	0.11546	RAL315	HD4
			2.64	EU3		2.28	ORw1118	CTE2		2	6.46	0.309598	RAL315	HD4
			2.62	EU3		3.11	ORw1118	CTE2		2.33	4.36	0.534404	RAL315	HD4
			3.16	EU3		2.11	ORw1118	CTE2		1.25	3.85	0.324675	RAL315	HD4
			1.94	EU3		3.24	ORw1118	CTE2		1.76	3.21	0.548287	RAL315	HD4
			2.52	EU3		4.3	ORw1118	CTE2		0.1	5.07	0.0197239	RAL315	HD4
			0.97	EU3		3.99	ORw1118	CTE2		1.35	4.69	0.287846	RAL315	HD4
			1.07	EU3		5.59	ORw1118	CTE2		1.79	4.26	0.420188	RAL315	HD4
			2.09	EU3		3.14	ORw1118	CTE2		1.91	3.95	0.483544	RAL315	HD4
			3.19	EU3		2.24	ORw1118	CTE2		2.42	4.36	0.555046	RAL315	HD4
			2.66	EU3		2.77	ORw1118	CTE2		0.98	3.02	0.324503	RAL315	HD4
			3.14	EU3		0.9	ORw1118	CTE2		1.6	3.57	0.448179	RAL315	HD4
			2.14	EU3		2.73	ORw1118	CTE2		0.59	3.68	0.160326	RAL315	HD4
			3.56	EU3		1.61	ORw1118	CTE2		0.64	2.78	0.230216	RAL315	HD4
			2.88	EU3		2.62	ORw1118	CTE2		0.76	3.46	0.219653	RAL315	HD4
			0	EU3		3.73	ORw1118	CTE2		1.25	3.4	0.367647	RAL315	HD4
			0	EU3		2.2	ORw1118	CTE2		0.96	3.96	0.242424	RAL315	HD4
			1.89	EU3		2.2	ORw1118	CTE2		2	5	0.4	RAL315	HD4
			1.71	EU3		2.27	ORw1118	CTE2		1.59	3.69	0.430894	RAL315	HD4
			2.09	EU3		0.63	ORw1118	CTE2		0.93	4	0.2325	RAL315	HD4
			2.28	EU3		1.41	ORw1118	CTE2		2	4.81	0.4158	RAL315	HD4
			1.85	EU3		2.39	ORw1118	CTE2		1.91	4.13	0.46247	RAL315	HD4
			3.26	EU3		0.59	ORw1118	CTE2		2.89	4.48	0.645089	RAL315	HD4
			1.16	EU3		3.12	ORw1118	CTE2		0.75	3.82	0.196335	RAL315	HD4
			1.68	EU3		3.39	ORw1118	CTE2		2.55	3.72	0.685484	RAL315	HD4
			2.21	EU3		1.9	ORw1118	CTE2		1.33	4.77	0.278826	RAL315	HD4
			1.89	EU3						1.33	3.16	0.420886	RAL315	HD4
			1.8	EU3						3.53	5.22	0.676245	RAL315	HD4
			2.53	EU3						1.81	4.18	0.433014	RAL315	HD4
			0	EU3						2.91	3.33	0.873874	RAL315	HD4
			1.5	EU3						1.85	4.22	0.438389	RAL315	HD4
			2.14	EU3						2.4	4.26	0.56338	RAL315	HD4
			1.5	EU3						0	3.74	0	RAL315	HD4
			1.15	EU3						1.15	3.53	0.325779	RAL315	HD4
			4.45	EU3						1.46	4.4	0.331818	RAL315	HD4
			2.18	EU3						1.66	4.63	0.358531	RAL315	HD4
			0.8	EU3						2.5	5.17	0.483559	RAL315	HD4
			2.58	EU3						1.87	4.93	0.37931	RAL315	HD4
			3.34	EU3						1.47	4.4	0.334091	RAL315	HD4
			0	EU3						2.65	4.58	0.578603	RAL315	HD4
			0	EU3						0.26	5.14	0.0505837	RAL315	HD4
			3.38	EU3						2	4.37	0.457666	RAL315	HD4
			2.88	EU3						3.72	4.83	0.770186	RAL315	HD4
			2.22	EU3						0	3.78	0	RAL315	HD4
			2.86	EU3						1.37	4.64	0.295259	RAL315	HD4
			3.14	EU3						1.08	3.02	0.357616	RAL315	HD4
			2.12	EU3						0.1	3.23	0.0309598	RAL315	HD4
			1.94	EU3						1.45	3.43	0.422741	RAL315	HD4
			3.72	EU3						0.62	3.53	0.175637	RAL315	HD4
			0.35	EU3						1.54	3.4	0.452941	RAL315	HD4
			4.29	EU3						0	3.76	0	RAL315	HD4
			1.8	EU3						0.1	3.46	0.0289017	RAL315	HD4
			2.95	EU3						0.1	2.6	0.0384615	RAL315	HD4
			1.88	EU3						0.84	3.53	0.23796	RAL315	HD4
			3.67	EU3						1.25	3.28	0.381098	RAL315	HD4
			1.55	EU3						1.62	3.7	0.437838	RAL315	HD4
			1.14	EU3						1.49	5.09	0.292731	RAL315	HD4
			1.68	EU3						1.29	3.5	0.368571	RAL315	HD4
			1.98	EU3						1.8	3.28	0.54878	RAL315	HD4
			0.6	EU3						1.66	3.75	0.442667	RAL315	HD4
			3.17	EU3						3	5.24	0.572519	RAL315	HD4
			2.1	EU3						2	4.35	0.45977	RAL315	HD4
			0.83	EU3						2.47	5.21	0.474088	RAL315	HD4
			2.37	EU3						2.21	5.47	0.404022	RAL315	HD4
			2.56	EU3						2.21	4.43	0.498871	RAL315	HD4
			2.05	EU3						1.8	4.07	0.44226	RAL315	HD4
			1.28	EU3						0.68	4.45	0.152809	RAL315	HD4
			2.08	EU3						1	4.7	0.212766	RAL315	HD4
			3.11	EU3						1.87	3.1	0.603226	RAL315	HD4
			3.47	EU3						3.34	4.73	0.706131	RAL315	HD4
			1.96	EU3						0.7	5	0.14	RAL315	HD4
			1.56	EU3						2.22	4.45	0.498876	RAL315	HD4
			3.06	EU3						2.15	6.09	0.353038	RAL315	HD4
			3.11	EU3						1.06	4.68	0.226496	RAL315	HD4
			1.13	EU3						2.18	5.54	0.393502	RAL315	HD4
			2.31	EU3						2.6	4.97	0.523139	RAL315	HD4
			0.99	EU3						1.73	5.5	0.314545	RAL315	HD4
			1.49	EU3						0.76	3.9	0.194872	RAL315	HD4
			1.19	EU3						2.97	4.45	0.667416	RAL315	HD4
			2.5	EU3						0.72	5.31	0.135593	RAL315	HD4
			1.62	EU3						1.36	5.39	0.252319	RAL315	HD4
			2.89	EU3						2.16	4.45	0.485393	RAL315	HD4
			1.95	EU3						3.3	4.33	0.762125	RAL315	HD4
			1.26	EU3						0.3	4.81	0.0623701	RAL315	HD4
			0.24	EU3						1.72	4.75	0.362105	RAL315	HD4
			2.31	EU3						1.63	4.64	0.351293	RAL315	HD4
			1.82	EU3						3.42	5.78	0.591696	RAL315	HD4
			1.54	EU3						2.77	4.82	0.574689	RAL315	HD4
			2.5	EU3						1.33	4.26	0.312207	RAL315	HD4
			0.76	EU3						1.27	2.95	0.430508	RAL315	HD4
			2.26	EU3						1.68	4.24	0.396226	RAL315	HD4
			1.39	EU3						2.89	5.36	0.539179	RAL315	HD4
			1.34	EU3						3.13	6.59	0.474962	RAL315	HD4
			3.06	EU3						0.75	5.72	0.131119	RAL315	HD4
			1.39	EU3						1.18	4.58	0.257642	RAL315	HD4
			1.56	EU3						1.32	2.95	0.447458	RAL315	HD4
			3.9	EU3						1.47	4.2	0.35	RAL315	HD4
			1.63	EU3						1.89	4.04	0.467822	RAL315	HD4
			1.97	EU3						2.1	4.28	0.490654	RAL315	HD4
			2.15	EU3						2.71	4.61	0.587852	RAL315	HD4
			0.74	EU3						1.56	6.37	0.244898	RAL315	HD4
			3.1	EU3						0.1	4.31	0.0232019	RAL315	HD4
			1.06	EU3						1.67	3.31	0.504532	RAL315	HD4
			2.21	EU3						0.1	3.6	0.0277778	RAL315	HD4
			2.68	EU3						3.46	5.3	0.65283	RAL315	HD4
			3.19	EU3						0.49	4	0.1225	RAL315	HD4
			2.07	EU3						1.96	4.03	0.486352	RAL315	HD4
			2.47	EU3						1.11	5.11	0.217221	RAL315	HD4
			2.41	EU3						1.32	5.8	0.227586	RAL315	HD4
			1.3	EU3						0.1	5.32	0.018797	RAL315	HD4
			2.38	EU3						1.38	4.52	0.30531	RAL315	HD4
			2.42	EU3						1.73	4.18	0.413876	RAL315	HD4
			2.33	EU3						3.34	5.14	0.649805	RAL315	HD4
			3.07	EU3						1.81	3.83	0.472585	RAL315	HD4
			2.22	EU3						2.69	3.28	0.820122	RAL315	HD4
			3.26	EU3						1	4.84	0.206612	RAL315	HD4
			3.64	EU3						2.1	4.43	0.474041	RAL315	HD4
			2.04	EU3						1.73	3.48	0.497126	RAL315	HD4
			2.43	EU3						1.13	4	0.2825	RAL315	HD4
			1.83	EU3						0.21	4.06	0.0517241	RAL315	HD4
			2.16	EU3						5.28	5.74	0.919861	RAL315	HD4
			2.39	EU3						2.67	3.74	0.713904	RAL315	HD4
			3.62	EU3						1.21	4.11	0.294404	RAL315	HD4
			2.43	EU3						0.35	4.36	0.0802752	RAL315	HD4
			3.42	EU3						0.93	5.7	0.163158	RAL315	HD4
			2.4	EU3						3.14	4.64	0.676724	RAL315	HD4
			2.48	EU3						0.6	5.61	0.106952	RAL315	HD4
			2.73	EU3						1.86	3.81	0.488189	RAL315	HD4
			1.81	EU3						2.7	5.19	0.520231	RAL315	HD4
										2.77	3.96	0.699495	RAL315	HD4
										2.61	4.68	0.557692	RAL315	HD4
										1.47	4.46	0.329596	RAL315	HD4
										1.05	4.36	0.240826	RAL315	HD4
										1.44	5.4	0.266667	RAL315	HD4
										2.8	6.41	0.436817	RAL315	HD4
										1.29	3.65	0.353425	RAL315	HD4
										2.04	4.49	0.454343	RAL315	HD4
										2.79	4.15	0.672289	RAL315	HD4
										1.67	4.26	0.392019	RAL315	HD4
										1.28	4.91	0.260692	RAL315	HD4
										1.35	5.22	0.258621	RAL315	HD4
										1.54	3.39	0.454277	RAL315	HD4
										1.81	4.89	0.370143	RAL315	HD4
										2.45	4.46	0.549327	RAL315	HD4
										1.62	4.89	0.331288	RAL315	HD4
										2.31	6.8	0.339706	RAL315	HD4
										2.7	4.57	0.59081	RAL315	HD4
										1.61	3.88	0.414948	RAL315	HD4
										3.06	4.24	0.721698	RAL315	HD4
										3.34	4.86	0.687243	RAL315	HD4
										0.53	5.03	0.105368	RAL315	HD4
										1.77	5.68	0.31162	RAL315	HD4
										2.52	5.56	0.453237	RAL315	HD4
										0.44	3.47	0.126801	RAL315	HD4
										1.71	3.81	0.448819	RAL315	HD4
										0.2	4.55	0.043956	RAL315	HD4
										3.14	5.75	0.546087	RAL315	HD4
										4.45	5.35	0.831776	RAL315	HD4
										2.49	4.16	0.598558	RAL315	HD4
										1.74	4.62	0.376623	RAL315	HD4
										1.95	3.6	0.541667	RAL315	HD4
										2.25	4.64	0.484914	RAL315	HD4
										1.73	3.72	0.465054	RAL315	HD4
